# Supplementary material for: Novel Genes Required for the Fitness of Streptococcus pyogenes in Human Saliva
Source: PubMed Central journal article supplement (PMC5663985; doi:10.1128/mspheredirect.00460-17), 2017-11-01
Supplement: sph006172393sf1.pdf [file sph006172393sf1.pdf]

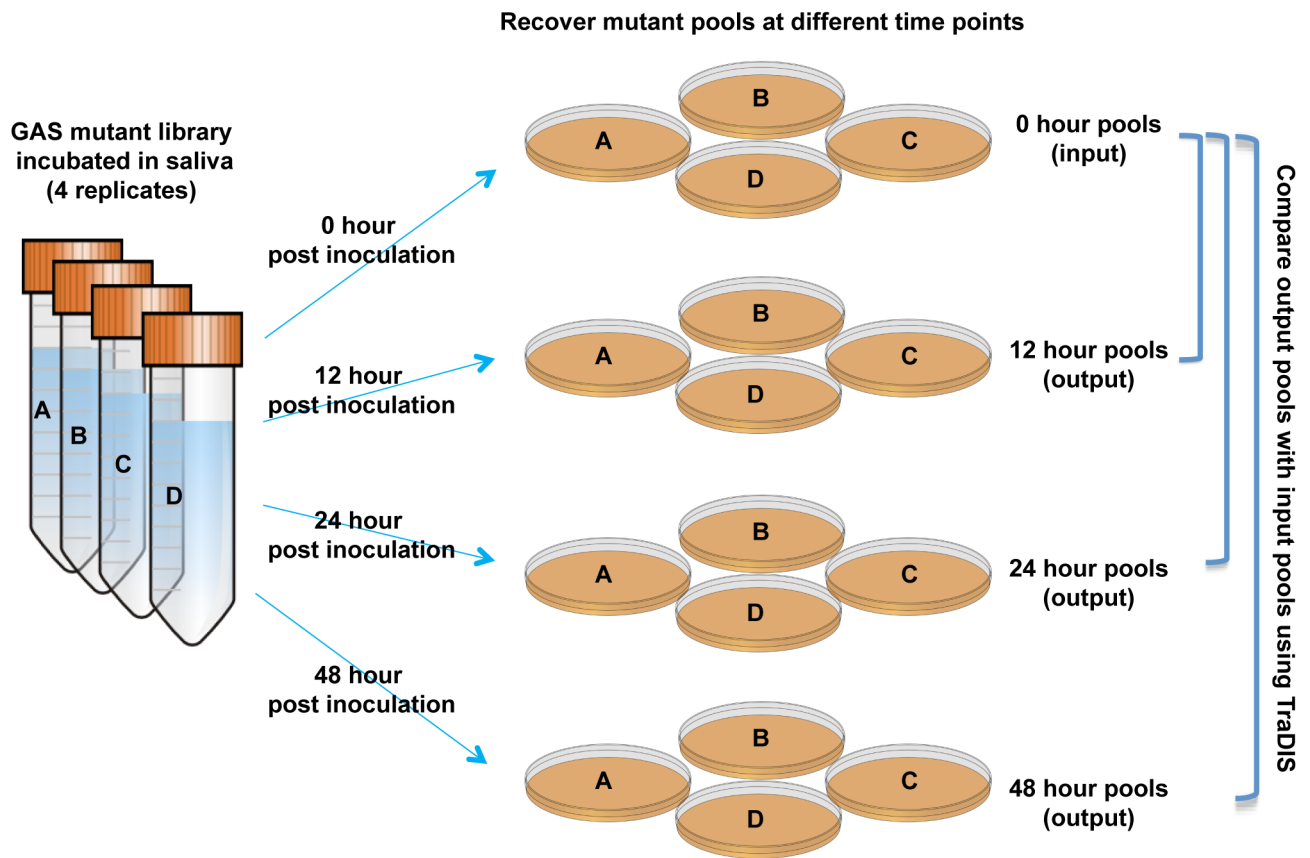

**FIG S1 Experimental strategy for TradIS mutant screens in human saliva.**
