# Supplementary material for: Novel Genes Required for the Fitness of Streptococcus pyogenes in Human Saliva
Source: PubMed Central journal article supplement (PMC5663985; doi:10.1128/mspheredirect.00460-17), 2017-11-01
Supplement: sph006172393st2.pdf [file sph006172393st2.pdf]

TABLE S1 Essential genes identified in the genome of serotype M1 GAS strain MGAS2221 under the conditions tested.

| No. | locus_tag     | gene_name     | start  | end    | strand | read_count | ins_index   | gene_length | ins_count | fcn                                                                                    |
|-----|---------------|---------------|--------|--------|--------|------------|-------------|-------------|-----------|----------------------------------------------------------------------------------------|
| 1   | M5005_Spy0001 | dnaA          | 232    | 1587   | 1      | 66         | 0.002948653 | 1356        | 4         | chromosomal replication initiator protein                                              |
| 2   | M5005_Spy0002 | dnaN          | 17423  | 28778  | 3      | 3          | 0.00159015  | 1742        | 2         | DNA polymerase III beta chain                                                          |
| 3   | M5005_Spy0005 | ph            | 4665   | 5234   | 1      | 0          | 0           | 570         | 0         | peptidyl-tRNA hydrolase                                                                |
| 4   | M5005_Spy0008 | divIC         | 9161   | 9532   | 1      | 77         | 0.010752688 | 372         | 4         | cell division protein                                                                  |
| 5   | M5005_Spy0011 | tisS          | 10950  | 12236  | 1      | 1          | 0.000777001 | 1287        | 1         | tRNA(Ile)-lysidine synthetase                                                          |
| 6   | M5005_Spy0012 | M5005_Spy0012 | 12241  | 12783  | 1      | 1          | 0.001841621 | 543         | 1         | hypoxanthine-guanine phosphoribosyltransferase                                         |
| 7   | M5005_Spy0013 | ftsH          | 12805  | 14784  | 1      | 1523       | 0.005055055 | 1980        | 10        | cell division protein                                                                  |
| 8   | M5005_Spy0017 | sibA          | 31164  | 32360  | 1      | 49         | 0.000835422 | 1197        | 1         | secreted protein                                                                       |
| 9   | M5005_Spy0018 | prsA2         | 32613  | 33575  | 1      | 186        | 0.007268951 | 963         | 7         | ribose-phosphate pyrophosphokinase                                                     |
| 10  | M5005_Spy0020 | phxK          | 34619  | 35626  | 1      | 3          | 0.000920263 | 1008        | 1         | fatty acid phospholipid synthesis protein                                              |
| 11  | M5005_Spy0021 | acpP2         | 35619  | 35961  | 1      | 0          | 0           | 243         | 0         | acyl carrier protein                                                                   |
| 12  | M5005_Spy0035 | rvbB          | 54461  | 55459  | 1      | 21         | 0.009009009 | 999         | 9         | holliday junction DNA helicase                                                         |
| 13  | M5005_Spy0037 | M5005_Spy0037 | 56057  | 56458  | 1      | 0          | 0           | 402         | 0         | putative membrane associated protein                                                   |
| 14  | M5005_Spy0038 | M5005_Spy0038 | 56455  | 58230  | 1      | 18         | 0.001126126 | 1776        | 2         | acyltransferase family                                                                 |
| 15  | M5005_Spy0043 | rpsJ          | 64330  | 64638  | 1      | 0          | 0           | 309         | 0         | SSU ribosomal protein S10P                                                             |
| 16  | M5005_Spy0044 | rplC          | 64854  | 65480  | 1      | 0          | 0           | 627         | 0         | LSU ribosomal protein L3P                                                              |
| 17  | M5005_Spy0045 | rplD          | 65504  | 66127  | 1      | 1          | 0.001602564 | 624         | 1         | LSU ribosomal protein L1E                                                              |
| 18  | M5005_Spy0046 | rplW          | 66127  | 66423  | 1      | 0          | 0           | 297         | 0         | LSU ribosomal protein L23P                                                             |
| 19  | M5005_Spy0047 | rplB          | 66441  | 67274  | 1      | 0          | 0           | 834         | 0         | LSU ribosomal protein L2P                                                              |
| 20  | M5005_Spy0048 | rpsS          | 67413  | 67691  | 1      | 0          | 0           | 279         | 0         | SSU ribosomal protein S19P                                                             |
| 21  | M5005_Spy0049 | rplV          | 67707  | 68051  | 1      | 0          | 0           | 345         | 0         | LSU ribosomal protein L22P                                                             |
| 22  | M5005_Spy0050 | rpsC          | 68064  | 68717  | 1      | 1          | 0.001529052 | 654         | 1         | SSU ribosomal protein S3P                                                              |
| 23  | M5005_Spy0051 | rplP          | 68721  | 69134  | 1      | 1          | 0.002415459 | 414         | 1         | LSU ribosomal protein L16P                                                             |
| 24  | M5005_Spy0052 | rpmC          | 69144  | 69350  | 1      | 0          | 0           | 207         | 0         | LSU ribosomal protein L29P                                                             |
| 25  | M5005_Spy0053 | rpsQ          | 69376  | 69636  | 1      | 1          | 0.003831418 | 261         | 1         | SSU ribosomal protein S17P                                                             |
| 26  | M5005_Spy0054 | rplN          | 69661  | 70029  | 1      | 3          | 0.005420054 | 369         | 2         | LSU ribosomal protein L14P                                                             |
| 27  | M5005_Spy0058 | rplX          | 70413  | 70413  | 1      | 0          | 0           | 306         | 0         | LSU ribosomal protein L24P                                                             |
| 28  | M5005_Spy0056 | rplE          | 70437  | 70979  | 1      | 0          | 0.001841621 | 543         | 1         | LSU ribosomal protein L5P                                                              |
| 29  | M5005_Spy0057 | rpsN          | 70995  | 71180  | 1      | 0          | 0           | 186         | 0         | SSU ribosomal protein S14P                                                             |
| 30  | M5005_Spy0058 | rpsH          | 71331  | 71729  | 1      | 0          | 0           | 399         | 0         | SSU ribosomal protein S8P                                                              |
| 31  | M5005_Spy0059 | rplF          | 71932  | 72468  | 1      | 0          | 0           | 537         | 0         | LSU ribosomal protein L6P                                                              |
| 32  | M5005_Spy0060 | rplR          | 72573  | 72929  | 1      | 0          | 0           | 357         | 0         | LSU ribosomal protein L18P                                                             |
| 33  | M5005_Spy0061 | rpsE          | 72948  | 73442  | 1      | 1          | 0.002020202 | 495         | 1         | SSU ribosomal protein S5P                                                              |
| 34  | M5005_Spy0062 | rpmD          | 73457  | 73639  | 1      | 1          | 0.005464481 | 183         | 1         | LSU ribosomal protein L30P                                                             |
| 35  | M5005_Spy0063 | rplD          | 73853  | 74293  | 1      | 0          | 0           | 441         | 0         | LSU ribosomal protein L15P                                                             |
| 36  | M5005_Spy0064 | secY          | 74310  | 75814  | 1      | 0          | 0           | 1305        | 0         | protein translocase subunit                                                            |
| 37  | M5005_Spy0065 | adk           | 75764  | 76402  | 1      | 276        | 0.00312989  | 639         | 2         | adenylate kinase                                                                       |
| 38  | M5005_Spy0066 | infA          | 76520  | 76738  | 1      | 0          | 0           | 219         | 0         | bacterial protein translation initiation factor 1                                      |
| 39  | M5005_Spy0067 | rpmJ          | 76764  | 76880  | 1      | 0          | 0           | 117         | 0         | LSU ribosomal protein L36P                                                             |
| 40  | M5005_Spy0068 | rpsM          | 76898  | 77263  | 1      | 0          | 0           | 366         | 0         | SSU ribosomal protein S13P                                                             |
| 41  | M5005_Spy0069 | rpsK          | 77281  | 77664  | 1      | 1          | 0.002604167 | 384         | 1         | SSU ribosomal protein S11P                                                             |
| 42  | M5005_Spy0070 | rpoA          | 77710  | 78648  | 1      | 1          | 0.001064963 | 939         | 1         | DNA-directed RNA polymerase alpha chain                                                |
| 43  | M5005_Spy0071 | rplQ          | 78663  | 79048  | 1      | 0          | 0           | 387         | 0         | LSU ribosomal protein L17P                                                             |
| 44  | M5005_Spy0081 | tyrS          | 90247  | 91503  | -1     | 2          | 0.00159109  | 1257        | 2         | tyrosyl-tRNA synthetase                                                                |
| 45  | M5005_Spy0083 | rpoB          | 94171  | 97737  | 1      | 1          | 0.000280348 | 3567        | 1         | DNA-directed RNA polymerase beta chain                                                 |
| 46  | M5005_Spy0084 | rpoC          | 97828  | 101469 | 1      | 1369       | 0.001922021 | 3642        | 7         | DNA-directed RNA polymerase beta' chain                                                |
| 47  | M5005_Spy0094 | ackA          | 106806 | 108002 | 1      | 24         | 0.000835422 | 1197        | 1         | acetate kinase                                                                         |
| 48  | M5005_Spy0138 | nusG          | 149282 | 149821 | 1      | 70         | 0.005555556 | 540         | 3         | transcription antitermination protein                                                  |
| 49  | M5005_Spy0140 | M5005_Spy0140 | 151552 | 152037 | 1      | 113        | 0.00617284  | 486         | 3         | hypothetical protein                                                                   |
| 50  | M5005_Spy0147 | leuS          | 157881 | 160268 | 1      | 30         | 0.001675042 | 2388        | 4         | leucyl-tRNA synthetase                                                                 |
| 51  | M5005_Spy0159 | polA          | 172165 | 174807 | 1      | 174        | 0.003783579 | 2643        | 10        | DNA polymerase I                                                                       |
| 52  | M5005_Spy0179 | M5005_Spy0179 | 186408 | 188223 | 1      | 20         | 0.007751938 | 516         | 4         | tRNA-specific adenosine deaminase                                                      |
| 53  | M5005_Spy0185 | pgj           | 192329 | 193678 | 1      | 129        | 0.003703704 | 1350        | 5         | glucose-6-phosphate isomerase                                                          |
| 54  | M5005_Spy0192 | hasC2         | 198307 | 199206 | -1     | 28         | 0.001111111 | 900         | 1         | UTP-glucose-1-phosphate uridylyltransferase                                            |
| 55  | M5005_Spy0194 | gpsA          | 199239 | 200255 | -1     | 0          | 0           | 1017        | 0         | glycerol-3-phosphate dehydrogenase [NAD(P)+]                                           |
| 56  | M5005_Spy0203 | gtX           | 209080 | 210525 | 1      | 141        | 0.002074689 | 1446        | 3         | glutamyl-tRNA synthetase                                                               |
| 57  | M5005_Spy0207 | fasX          | 214830 | 215189 | 1      | 311        | 0.008333333 | 360         | 3         | ribonuclease P protein component                                                       |
| 58  | M5005_Spy0211 | rpmH          | 217223 | 217357 | 1      | 0          | 0           | 135         | 0         | LSU ribosomal protein L34P                                                             |
| 59  | M5005_Spy0223 | M5005_Spy0223 | 228230 | 229102 | 1      | 54         | 0.004581901 | 873         | 4         | GTPase                                                                                 |
| 60  | M5005_Spy0224 | rpe           | 229112 | 229774 | 1      | 755        | 0.013574661 | 663         | 9         | ribulose-phosphate 3-epimerase                                                         |
| 61  | M5005_Spy0230 | rpsL          | 229526 | 236939 | 1      | 0          | 0           | 414         | 0         | SSU ribosomal protein S12P                                                             |
| 62  | M5005_Spy0231 | rpsG          | 236960 | 237430 | 1      | 74         | 0.004246285 | 471         | 2         | SSU ribosomal protein S7P                                                              |
| 63  | M5005_Spy0232 | fus           | 237797 | 239875 | 1      | 221        | 0.001924002 | 2079        | 4         | protein translation elongation factor G                                                |
| 64  | M5005_Spy0233 | pir           | 240223 | 241233 | 1      | 312        | 0.002967359 | 1011        | 3         | glyceraldehyde 3-phosphate dehydrogenase                                               |
| 65  | M5005_Spy0235 | M5005_Spy0235 | 241717 | 242457 | -1     | 1          | 0.001349528 | 741         | 1         | amino acid transport ATP-binding protein                                               |
| 66  | M5005_Spy0236 | M5005_Spy0236 | 242450 | 244018 | -1     | 0          | 0           | 1569        | 0         | ABC transporter amino acid-binding protein/amino acid ABC transporter permease protein |
| 67  | M5005_Spy0239 | mecA          | 247165 | 247926 | 1      | 115        | 0.007874016 | 762         | 6         | negative regulator of genetic competence                                               |
| 68  | M5005_Spy0240 | M5005_Spy0240 | 248077 | 249102 | 1      | 328        | 0.010721248 | 1026        | 11        | undecaprenyl-phosphate alpha-N-acetylglucosaminophosphotransferase                     |
| 69  | M5005_Spy0260 | M5005_Spy0260 | 272715 | 273299 | 1      | 393        | 0.003418023 | 595         | 2         | putative lipase                                                                        |
| 70  | M5005_Spy0261 | M5005_Spy0261 | 275299 | 274417 | 1      | 1          | 0.000893655 | 1119        | 1         | GTP-binding protein                                                                    |
| 71  | M5005_Spy0263 | nadD          | 274819 | 275451 | 1      | 0          | 0           | 633         | 0         | nicotinate-nucleotide adenyltransferase                                                |
| 72  | M5005_Spy0264 | M5005_Spy0264 | 276448 | 276041 | 1      | 38         | 0.005055055 | 594         | 3         | hydrolase                                                                              |
| 73  | M5005_Spy0270 | M5005_Spy0270 | 279970 | 280812 | 1      | 341        | 0.008303677 | 843         | 7         | ABC transporter substrate-binding protein                                              |
| 74  | M5005_Spy0276 | M5005_Spy0276 | 286920 | 287594 | -1     | 145        | 0.002962963 | 675         | 2         | potassium uptake protein                                                               |
| 75  | M5005_Spy0277 | M5005_Spy0277 | 287604 | 288995 | -1     | 0          | 0           | 1392        | 0         | potassium uptake protein                                                               |
| 76  | M5005_Spy0281 | M5005_Spy0281 | 291662 | 292195 | 1      | 11         | 0.007490637 | 534         | 4         | putative cytosolic protein                                                             |
| 77  | M5005_Spy0282 | covR          | 292462 | 293148 | 1      | 3          | 0.004366812 | 687         | 3         | response regulator                                                                     |
| 78  | M5005_Spy0283 | covS          | 293291 | 294665 | 1      | 264        | 0.002187602 | 1365        | 3         | transmembrane histidine kinase                                                         |
| 79  | M5005_Spy0284 | M5005_Spy0284 | 295384 | 295384 | 1      | 453        | 0.014141414 | 495         | 7         | putative regulatory protein                                                            |
| 80  | M5005_Spy0285 | dnaB          | 295348 | 296233 | 1      | 1          | 0.00085034  | 1176        | 1         | replicative DNA helicase                                                               |
| 81  | M5005_Spy0286 | dnal          | 296524 | 297426 | 1      | 1          | 0.00110742  | 903         | 1         | primosomal protein                                                                     |
| 82  | M5005_Spy0287 | pgdA          | 297489 | 298799 | 1      | 1          | 0.000762777 | 1311        | 1         | GTP-binding protein                                                                    |
| 83  | M5005_Spy0289 | M5005_Spy0289 | 302347 | 302949 | 1      | 0          | 0           | 603         | 0         | putative cytosolic protein                                                             |
| 84  | M5005_Spy0290 | murC          | 302989 | 304317 | 1      | 187        | 0.003009782 | 1329        | 4         | UDP-N-acetylmuramate-alanine ligase                                                    |
| 85  | M5005_Spy0292 | M5005_Spy0292 | 304963 | 306531 | 1      | 178        | 0.007648184 | 1569        | 12        | aminooxychoisamate lyase family                                                        |
| 86  | M5005_Spy0295 | M5005_Spy0295 | 307709 | 308632 | -1     | 332        | 0.014069264 | 924         | 13        | 60 kDa inner membrane protein Y1DC                                                     |
| 87  | M5005_Spy0302 | M5005_Spy0302 | 312725 | 312967 | 1      | 0          | 0           | 243         | 0         | putative exported protein                                                              |
| 88  | M5005_Spy0303 | glr           | 313145 | 313939 | 1      | 0          | 0           | 795         | 0         | glutamate racemase                                                                     |
| 89  | M5005_Spy0319 | ppaC          | 325505 | 326440 | 1      | 85         | 0.00534188  | 936         | 5         | manganese-dependent inorganic pyrophosphatase                                          |
| 90  | M5005_Spy0325 | murE          | 331240 | 332685 | -1     | 5          | 0.002074689 | 1446        | 3         | UDP-N-acetylmuramoyl-L-alanyl-D-glutamate-lysine ligase                                |
| 91  | M5005_Spy0326 | M5005_Spy0326 | 332773 | 334407 | 1      | 1623       | 0.001223242 | 1635        | 2         | export protein for polysaccharides and teichoic acids                                  |
| 92  | M5005_Spy0328 | clpP          | 335428 | 336018 | 1      | 232        | 0.013536379 | 591         | 8         | ATP-dependent Clp protease proteolytic subunit                                         |
| 93  | M5005_Spy0330 | tmk           | 337034 | 337669 | 1      | 19         | 0.003144654 | 636         | 2         | thymidylate kinase                                                                     |
| 94  | M5005_Spy0331 | dnaX          | 337687 | 338562 | 1      | 215        | 0.006849315 | 876         | 6         | DNA polymerase III                                                                     |
| 95  | M5005_Spy0334 | M5005_Spy0334 | 339225 | 339548 | 1      | 27         | 0.00617284  | 324         | 2         | hypothetical protein                                                                   |
| 96  | M5005_Spy0345 | metS          | 351409 | 353406 | 1      | 28         | 0.003003003 | 1998        | 6         | methionyl-tRNA synthetase                                                              |
| 97  | M5005_Spy0362 | gcaD          | 367792 | 369174 | 1      | 315        | 0.002169197 | 1383        | 3         | glucosamine-1-phosphate acetyltransferase/UDP-N-acetylglucosamine pyrophosphorylase    |
| 98  | M5005_Spy0365 | pfs           | 370030 | 370725 | 1      | 271        | 0.001436782 | 996         | 1         | 5'-methylthioadenosine nucleosidase/S-adenosylhomocysteine nucleosidase                |
| 99  | M5005_Spy0368 | mtsA          | 372123 | 373043 | 1      | 5          | 0.004343105 | 621         | 4         | manganese-binding protein                                                              |
| 100 | M5005_Spy0369 | mtsB          | 373107 | 373832 | 1      | 2          | 0.002754821 | 726         | 2         | manganese transport system ATP-binding protein                                         |
| 101 | M5005_Spy0370 | mtsC          | 373833 | 374687 | 1      | 16         | 0.007017544 | 855         | 6         | manganese transport system membrane protein                                            |
| 102 | M5005_Spy0372 | ftsK          | 375858 | 378263 | 1      | 444        | 0.00186251  | 2406        | 4         | cell division protein                                                                  |
| 103 | M5005_Spy0374 | rplK          | 378930 | 379355 | 1      | 0          | 0           | 426         | 0         | LSU ribosomal protein L11P                                                             |
| 104 | M5005_Spy0375 | rplA          | 379461 | 380150 | 1      | 4          | 0.001449275 | 690         | 1         | LSU ribosomal protein L1P                                                              |
| 105 | M5005_Spy0377 | pyrH          | 381799 | 382527 | 1      | 42         | 0.005489698 | 729         | 4         | uridylylase                                                                            |
| 106 | M5005_Spy0380 | rff           | 382556 | 383113 | 1      | 11         | 0.001792115 | 558         | 1         | ribosome recycling factor                                                              |
| 107 | M5005_Spy0388 | M5005_Spy0388 | 390224 | 390772 | 1      | 0          | 0           | 549         | 0         | putative metal-binding protein                                                         |
| 108 | M5005_Spy0389 | dgk           | 390753 | 391160 | 1      | 0          | 0           | 408         | 0         | diacylglycerol kinase                                                                  |
| 109 | M5005_Spy0390 | era           | 391280 | 392176 | 1      | 15         | 0.002229654 | 897         | 2         | GTP-binding protein-like protein                                                       |
| 110 | M5005_Spy0409 | M5005_Spy0409 | 401625 | 402305 | 1      | 54         | 0.010279001 | 681         | 7         | dephospho-CoA kinase                                                                   |
| 111 | M5005_Spy0413 | secG          | 405501 | 405737 | 1      | 24         | 0.012658228 | 237         | 3         | protein translocase subunit                                                            |
| 11  |               |               |        |        |        |            |             |             |           |                                                                                        |

|     |               |               |        |        |    |      |             |      |    |                                                                                                                              |
|-----|---------------|---------------|--------|--------|----|------|-------------|------|----|------------------------------------------------------------------------------------------------------------------------------|
| 120 | M5005_Spy0484 | ptsK          | 473608 | 474633 | 1  | 484  | 0.011695906 | 1026 | 12 | hpr(ser) kinase                                                                                                              |
| 121 | M5005_Spy0488 | M5005_Spy0488 | 476418 | 476702 | -1 | 0    | 0           | 285  | 0  | hypothetical protein                                                                                                         |
| 122 | M5005_Spy0495 | lysS          | 479999 | 481492 | -1 | 0    | 0           | 1494 | 0  | lysyl-tRNA synthetase                                                                                                        |
| 123 | M5005_Spy0506 | ftsW          | 482532 | 493806 | 1  | 203  | 0.007058824 | 1275 | 9  | cell division protein                                                                                                        |
| 124 | M5005_Spy0508 | M5005_Spy0508 | 485160 | 495356 | 1  | 1    | 0.000835422 | 1197 | 2  | protein translation elongation factor Tu                                                                                     |
| 125 | M5005_Spy0509 | tpi           | 495597 | 496355 | 1  | 392  | 0.005270092 | 759  | 4  | triosephosphate isomerase                                                                                                    |
| 126 | M5005_Spy0510 | M5005_Spy0510 | 496454 | 497689 | -1 | 224  | 0.003236246 | 1236 | 4  | factor essential for expression of methicillin resistance                                                                    |
| 127 | M5005_Spy0511 | murM          | 497676 | 498902 | -1 | 2    | 0.001629992 | 1227 | 2  | UDP-N-acetylmuramoylpentapeptide-lysine N(6)-alanyltransferase/UDP-N-acetylmuramoylpentapeptide-lysine N(6)-seryltransferase |
| 128 | M5005_Spy0512 | M5005_Spy0512 | 498902 | 499711 | -1 | 1    | 0.001234568 | 810  | 1  | hydrolase                                                                                                                    |
| 129 | M5005_Spy0516 | pacL          | 502167 | 504848 | 1  | 153  | 0.00186428  | 2682 | 5  | calcium-transporting ATPase                                                                                                  |
| 130 | M5005_Spy0530 | prfB          | 518136 | 519149 | 1  | 2    | 0.001972387 | 1014 | 2  | bacterial peptide chain release factor 2                                                                                     |
| 131 | M5005_Spy0531 | ftsE          | 519168 | 519860 | 1  | 0    | 0           | 693  | 0  | cell division ATP-binding protein                                                                                            |
| 132 | M5005_Spy0532 | ftsK          | 519853 | 520782 | 1  | 76   | 0.003225806 | 930  | 3  | cell division protein                                                                                                        |
| 133 | M5005_Spy0538 | asnS          | 526880 | 528226 | 1  | 7    | 0.00074239  | 1347 | 1  | asparaginyl-tRNA synthetase                                                                                                  |
| 134 | M5005_Spy0546 | rpmE          | 536826 | 537086 | -1 | 6    | 0.003831418 | 261  | 1  | LSU ribosomal protein L31P                                                                                                   |
| 135 | M5005_Spy0547 | M5005_Spy0547 | 537201 | 538142 | -1 | 17   | 0.007430998 | 942  | 7  | phosphoesterase                                                                                                              |
| 136 | M5005_Spy0548 | M5005_Spy0548 | 538536 | 538985 | 1  | 178  | 0.008888889 | 450  | 4  | flavodoxin                                                                                                                   |
| 137 | M5005_Spy0551 | rplS          | 540815 | 541162 | 1  | 0    | 0           | 348  | 0  | LSU ribosomal protein L19P                                                                                                   |
| 138 | M5005_Spy0552 | M5005_Spy0552 | 542165 | 542734 | 1  | 3    | 0.005263158 | 570  | 3  | DNA gyrase related protein                                                                                                   |
| 139 | M5005_Spy0553 | gyrB          | 542735 | 544687 | 1  | 0    | 0           | 1953 | 0  | DNA gyrase subunit B                                                                                                         |
| 140 | M5005_Spy0554 | M5005_Spy0554 | 545055 | 546779 | 1  | 100  | 0.002898551 | 1725 | 5  | septation ring formation regulator                                                                                           |
| 141 | M5005_Spy0556 | emoS          | 547596 | 548903 | 1  | 297  | 0.003058104 | 1308 | 4  | enolase                                                                                                                      |
| 142 | M5005_Spy0573 | lig           | 572301 | 574259 | 1  | 318  | 0.001020929 | 1959 | 2  | NAD-dependent DNA ligase                                                                                                     |
| 143 | M5005_Spy0574 | M5005_Spy0574 | 574273 | 575295 | 1  | 231  | 0.010752688 | 1023 | 11 | diacylglycerol kinase family                                                                                                 |
| 144 | M5005_Spy0575 | atpE          | 575688 | 575885 | 1  | 0    | 0           | 198  | 0  | ATP synthase C chain                                                                                                         |
| 145 | M5005_Spy0576 | atpB          | 575920 | 576636 | 1  | 0    | 0           | 717  | 0  | ATP synthase A chain                                                                                                         |
| 146 | M5005_Spy0577 | atpF          | 576654 | 577148 | 1  | 0    | 0           | 495  | 0  | ATP synthase B chain                                                                                                         |
| 147 | M5005_Spy0578 | atpH          | 577148 | 577684 | 1  | 0    | 0           | 537  | 0  | ATP synthase delta chain                                                                                                     |
| 148 | M5005_Spy0579 | atpA          | 577700 | 579208 | 1  | 0    | 0           | 1509 | 0  | ATP synthase alpha chain                                                                                                     |
| 149 | M5005_Spy0580 | atpD          | 579224 | 580099 | 1  | 4    | 0.002283105 | 876  | 2  | ATP synthase gamma chain                                                                                                     |
| 150 | M5005_Spy0581 | atpD          | 580261 | 581667 | 1  | 3    | 0.001421464 | 1407 | 2  | ATPase                                                                                                                       |
| 151 | M5005_Spy0582 | atpC          | 581680 | 582096 | 1  | 20   | 0.011990408 | 417  | 5  | ATP synthase epsilon chain                                                                                                   |
| 152 | M5005_Spy0587 | pheS          | 585005 | 586048 | 1  | 0    | 0           | 1044 | 0  | phenylalanyl-tRNA synthetase alpha chain                                                                                     |
| 153 | M5005_Spy0588 | pheT          | 586243 | 588663 | 1  | 3    | 0.000826105 | 2421 | 2  | phenylalanyl-tRNA synthetase beta chain                                                                                      |
| 154 | M5005_Spy0595 | rexA          | 595702 | 599370 | 1  | 432  | 0.013355138 | 3669 | 49 | ATP-dependent nuclease subunit A                                                                                             |
| 155 | M5005_Spy0597 | M5005_Spy0597 | 600433 | 600639 | 1  | 0    | 0           | 207  | 0  | SSU ribosomal protein S21P                                                                                                   |
| 156 | M5005_Spy0599 | dnaG          | 601260 | 603074 | 1  | 0    | 0           | 1815 | 0  | DNA primase                                                                                                                  |
| 157 | M5005_Spy0600 | rpmD          | 603083 | 604182 | 1  | 125  | 0.000900901 | 1110 | 1  | RNA polymerase sigma factor                                                                                                  |
| 158 | M5005_Spy0605 | rmlD          | 604964 | 605758 | 1  | 0    | 0           | 855  | 0  | dTDP-4-dehydrothiamine reductase                                                                                             |
| 159 | M5005_Spy0603 | rgpAc         | 605877 | 607031 | 1  | 1428 | 0.001731602 | 1155 | 2  | alpha-(1,2)-rhamnosyltransferase                                                                                             |
| 160 | M5005_Spy0604 | rgpBc         | 607021 | 607953 | 1  | 1428 | 0.002143623 | 933  | 2  | alpha-L-Rha alpha-1,3-L-rhamnosyltransferase                                                                                 |
| 161 | M5005_Spy0605 | rgpCc         | 607956 | 608759 | 1  | 0    | 0           | 804  | 0  | polysaccharide export ABC transporter permease protein                                                                       |
| 162 | M5005_Spy0606 | rgpDc         | 608759 | 609694 | 1  | 202  | 0.002487562 | 1206 | 3  | polysaccharide export ATP-binding protein                                                                                    |
| 163 | M5005_Spy0607 | rgpEc         | 609899 | 610996 | 1  | 1    | 0.000992063 | 1008 | 1  | glycosyltransferase                                                                                                          |
| 164 | M5005_Spy0608 | rgpFc         | 610993 | 612738 | 1  | 342  | 0.005154639 | 1746 | 9  | alpha-1,3-L-rhamnosyltransferase                                                                                             |
| 165 | M5005_Spy0613 | M5005_Spy0613 | 617896 | 619182 | 1  | 676  | 0.005344021 | 1497 | 8  | putative membrane spanning protein                                                                                           |
| 166 | M5005_Spy0615 | etsA          | 620540 | 621028 | 1  | 5    | 0.008179959 | 489  | 4  | pore forming protein                                                                                                         |
| 167 | M5005_Spy0616 | M5005_Spy0616 | 621015 | 621212 | -1 | 7    | 0.005050505 | 1987 | 1  | ferredoxin                                                                                                                   |
| 168 | M5005_Spy0617 | M5005_Spy0617 | 621261 | 621737 | 1  | 5    | 0.002096436 | 477  | 1  | putative membrane associated protein                                                                                         |
| 169 | M5005_Spy0619 | infC          | 622594 | 623124 | 1  | 0    | 0           | 531  | 0  | bacterial protein translation initiation factor 3                                                                            |
| 170 | M5005_Spy0620 | rpl36         | 623166 | 623363 | 1  | 0    | 0           | 198  | 0  | LSU ribosomal protein L35P                                                                                                   |
| 171 | M5005_Spy0621 | rplT          | 623422 | 623781 | 1  | 0    | 0           | 360  | 0  | LSU ribosomal protein L20P                                                                                                   |
| 172 | M5005_Spy0622 | M5005_Spy0622 | 624072 | 626243 | -1 | 349  | 0.001841621 | 2172 | 4  | phosphoglycerol transferase                                                                                                  |
| 173 | M5005_Spy0633 | rplU          | 637444 | 637758 | 1  | 0    | 0           | 315  | 0  | LSU ribosomal protein L21P                                                                                                   |
| 174 | M5005_Spy0634 | M5005_Spy0634 | 637770 | 638096 | 1  | 0    | 0           | 327  | 0  | putative ribosome-associated protein                                                                                         |
| 175 | M5005_Spy0635 | rpmA          | 638124 | 638417 | 1  | 1    | 0.003401361 | 294  | 1  | LSU ribosomal protein L27P                                                                                                   |
| 176 | M5005_Spy0638 | M5005_Spy0638 | 640124 | 641014 | 1  | 38   | 0.01010101  | 891  | 9  | ribosomal large subunit pseudouridine synthase D                                                                             |
| 177 | M5005_Spy0648 | rpsP          | 645264 | 645436 | 1  | 20   | 0.010989011 | 273  | 3  | SSU ribosomal protein S16P                                                                                                   |
| 178 | M5005_Spy0655 | rimM          | 661070 | 661588 | 1  | 0    | 0           | 519  | 0  | 16S rRNA processing protein                                                                                                  |
| 179 | M5005_Spy0656 | trmD          | 661578 | 662309 | 1  | 596  | 0.00273224  | 732  | 2  | tRNA (guanine-N(1))-methyltransferase                                                                                        |
| 180 | M5005_Spy0657 | trxB          | 662309 | 663301 | 1  | 123  | 0.013091641 | 993  | 13 | thioredoxin reductase                                                                                                        |
| 181 | M5005_Spy0671 | M5005_Spy0671 | 673722 | 674102 | 1  | 0    | 0           | 381  | 0  | transposase                                                                                                                  |
| 182 | M5005_Spy0672 | M5005_Spy0672 | 674102 | 674950 | 1  | 99   | 0.011778563 | 849  | 10 | degY family protein                                                                                                          |
| 183 | M5005_Spy0678 | rpsA          | 675075 | 676283 | 1  | 601  | 0.01065426  | 894  | 2  | poly(A) polymerase/tRNA nucleotidyltransferase                                                                               |
| 184 | M5005_Spy0682 | mvaK1         | 684614 | 685507 | 1  | 0    | 0           | 894  | 0  | nevalonate kinase                                                                                                            |
| 185 | M5005_Spy0683 | mvaD          | 685489 | 686433 | 1  | 0    | 0           | 945  | 0  | diphosphomevalonate decarboxylase                                                                                            |
| 186 | M5005_Spy0684 | mvaK2         | 686426 | 687433 | 1  | 1    | 0.000992063 | 1008 | 1  | phosphomevalonate kinase                                                                                                     |
| 187 | M5005_Spy0685 | M5005_Spy0685 | 687426 | 688415 | 1  | 5    | 0.001010101 | 990  | 1  | isopentenyl-diphosphate delta-isomerase                                                                                      |
| 188 | M5005_Spy0686 | M5005_Spy0686 | 688645 | 689922 | -1 | 44   | 0.001564945 | 1278 | 2  | 3-hydroxy-3-methylglutaryl-coenzyme A reductase                                                                              |
| 189 | M5005_Spy0687 | mvaS1         | 689909 | 691084 | -1 | 1    | 0.00085034  | 1176 | 1  | hydroxymethylglutaryl-CoA synthase                                                                                           |
| 190 | M5005_Spy0688 | thyA          | 691293 | 692132 | 1  | 1    | 0.001190476 | 840  | 1  | thymidylate synthase                                                                                                         |
| 191 | M5005_Spy0697 | atpF          | 692212 | 692709 | 1  | 5    | 0.004016064 | 498  | 2  | dihydrofolate reductase                                                                                                      |
| 192 | M5005_Spy0692 | M5005_Spy0692 | 694268 | 694667 | 1  | 172  | 0.003333333 | 600  | 2  | GTP-binding protein                                                                                                          |
| 193 | M5005_Spy0695 | rplA          | 698294 | 698977 | 1  | 14   | 0.00877193  | 684  | 6  | ribose 5-phosphate isomerase                                                                                                 |
| 194 | M5005_Spy0696 | deoB          | 699054 | 700265 | 1  | 20   | 0.00990099  | 1212 | 12 | phosphopentomutase                                                                                                           |
| 195 | M5005_Spy0698 | punA          | 700708 | 701517 | 1  | 28   | 0.009876543 | 810  | 8  | purine nucleoside phosphorylase                                                                                              |
| 196 | M5005_Spy0710 | M5005_Spy0710 | 712627 | 713268 | -1 | 0    | 0           | 642  | 0  | putative membrane spanning protein                                                                                           |
| 197 | M5005_Spy0711 | parE          | 713403 | 715352 | 1  | 9    | 0.001025641 | 1950 | 2  | topoisomerase IV subunit B                                                                                                   |
| 198 | M5005_Spy0712 | parC          | 715443 | 717902 | 1  | 185  | 0.00203252  | 2460 | 5  | topoisomerase IV subunit A                                                                                                   |
| 199 | M5005_Spy0714 | M5005_Spy0714 | 719111 | 719341 | 1  | 3    | 0.008658009 | 231  | 2  | putative cytosolic protein                                                                                                   |
| 200 | M5005_Spy0715 | M5005_Spy0715 | 719732 | 720397 | 1  | 25   | 0.00318775  | 1206 | 4  | LSU ribosomal protein S1P                                                                                                    |
| 201 | M5005_Spy0725 | etsC          | 728127 | 729056 | 1  | 952  | 0.004301075 | 930  | 4  | metal-dependent hydrolase                                                                                                    |
| 202 | M5005_Spy0729 | dnaD          | 732777 | 733460 | 1  | 0    | 0           | 684  | 0  | DNA replication protein                                                                                                      |
| 203 | M5005_Spy0731 | M5005_Spy0731 | 734185 | 734871 | 1  | 49   | 0.002911208 | 687  | 2  | para-aminobenzoate synthase component I/anthranilate synthase component I                                                    |
| 204 | M5005_Spy0734 | cpsFO         | 736853 | 737722 | 1  | 0    | 0           | 870  | 0  | glucose-1-phosphate thymidyltransferase                                                                                      |
| 205 | M5005_Spy0735 | cpsFP         | 737722 | 738315 | 1  | 1    | 0.001683502 | 594  | 1  | dTDP-4-dehydrothiamine 3,5-epimerase                                                                                         |
| 206 | M5005_Spy0736 | cpsFQ         | 738559 | 739599 | 1  | 537  | 0.006724304 | 1041 | 7  | dTDP-glucose 4,6-dehydratase                                                                                                 |
| 207 | M5005_Spy0747 | M5005_Spy0747 | 748009 | 749670 | 1  | 26   | 0.001203369 | 1662 | 2  | Zn-dependent hydrolase                                                                                                       |
| 208 | M5005_Spy0753 | acoC          | 755392 | 756901 | 1  | 33   | 0.00992978  | 1410 | 14 | dihydrolipicamide acetyltransferase component of pyruvate dehydrogenase complex                                              |
| 209 | M5005_Spy0759 | M5005_Spy0759 | 763313 | 764104 | 1  | 195  | 0.008838384 | 792  | 7  | putative membrane associated protein                                                                                         |
| 210 | M5005_Spy0760 | M5005_Spy0760 | 764104 | 765447 | -1 | 1    | 0.000744048 | 1344 | 1  | UDP-N-acetylmuramoylalanine-D-glutamate--2, 6-diaminopimelate ligase                                                         |
| 211 | M5005_Spy0761 | M5005_Spy0761 | 765554 | 766405 | 1  | 1    | 0.001173709 | 852  | 1  | putative membrane spanning protein                                                                                           |
| 212 | M5005_Spy0763 | femD          | 767412 | 768767 | 1  | 1416 | 0.005162242 | 1356 | 7  | phosphoglucosamine mutase                                                                                                    |
| 213 | M5005_Spy0792 | M5005_Spy0792 | 797080 | 797682 | 1  | 24   | 0.013266998 | 603  | 8  | NAD(P)H-dependent quinone reductase                                                                                          |
| 214 | M5005_Spy0794 | thdF          | 799284 | 800660 | -1 | 6    | 0.002178649 | 1377 | 3  | tRNA (5-carboxymethylaminomethyl-2-thiouridylyl) synthase                                                                    |
| 215 | M5005_Spy0795 | rplJ          | 800897 | 801493 | 1  | 1    | 0.001675042 | 597  | 1  | LSU ribosomal protein L10P                                                                                                   |
| 216 | M5005_Spy0796 | rplL          | 801558 | 801923 | 1  | 0    | 0           | 366  | 0  | LSU ribosomal protein L12P                                                                                                   |
| 217 | M5005_Spy0820 | folH1         | 815143 | 816420 | 1  | 18   | 0.00312989  | 1278 | 4  | folylpolyglutamate synthase/dihydrofolate synthase                                                                           |
| 218 | M5005_Spy0821 | folE          | 816467 | 817033 | 1  | 0    | 0           | 567  | 0  | GTP cyclohydrolase I                                                                                                         |
| 219 | M5005_Spy0822 | folP          | 817042 | 817842 | 1  | 9    | 0.001248439 | 801  | 1  | dihydropterate synthase                                                                                                      |
| 220 | M5005_Spy0823 | folQ          | 817849 | 818208 | 1  | 0    | 0           | 360  | 0  | dihydropteroin aldolase                                                                                                      |
| 221 | M5005_Spy0825 | murB          | 818855 | 819742 | 1  | 110  | 0.003378378 | 888  | 3  | UDP-N-acetylenolpyruvoylglucosamine reductase                                                                                |
| 222 | M5005_Spy0842 | M5005_Spy0842 | 835819 | 836643 | -1 | 2    | 0.003100775 | 645  | 2  | redox-sensitive transcriptional regulator Rex                                                                                |
| 223 | M5005_Spy0844 | nifS2         | 837052 | 838179 | -1 | 0    | 0           | 1128 | 0  | cysteine desulfhydrase                                                                                                       |
| 224 | M5005_Spy0845 | M5005_Spy0845 | 838176 | 839156 | -1 | 0    | 0           | 981  | 0  | ribose-phosphate pyrophosphokinase                                                                                           |
| 225 | M5005_Spy0848 | M5005_Spy0848 | 840908 | 841444 | 1  | 650  | 0.004778973 | 1080 | 4  | ATP-NAD kinase                                                                                                               |
| 226 | M5005_Spy0863 | pfsA          | 852306 | 854285 | 1  | 14   | 0.000925926 | 1980 | 1  | bacterial peptide chain release factor 1                                                                                     |
| 227 | M5005_Spy0865 | M5005_Spy0865 | 855108 | 855698 | 1  | 2    | 0.003384095 | 591  | 2  | SUA5 protein                                                                                                                 |
| 228 | M5005_Spy0874 | gyrA          | 865400 | 867886 | 1  | 669  | 0.004423    | 2487 | 11 | DNA gyrase subunit A                                                                                                         |

|     |               |               |         |         |    |      |             |      |    |                                                                                                                     |
|-----|---------------|---------------|---------|---------|----|------|-------------|------|----|---------------------------------------------------------------------------------------------------------------------|
| 242 | M5005_Spy0945 | coaA          | 935108  | 936028  | 1  | 15   | 0.002171553 | 921  | 2  | pantothenate kinase                                                                                                 |
| 243 | M5005_Spy0950 | phoU          | 941520  | 942173  | -1 | 15   | 0.009174312 | 654  | 6  | phosphate transport system protein                                                                                  |
| 244 | M5005_Spy0959 | M5005_Spy0959 | 949030  | 949434  | -1 | 0    | 0           | 405  | 0  | arsenate reductase family protein                                                                                   |
| 245 | M5005_Spy0960 | mreA          | 949477  | 950409  | -1 | 0    | 0           | 933  | 0  | riboflavin kinase/FMN adenylyltransferase                                                                           |
| 246 | M5005_Spy0972 | mreA          | 952274  | 964558  | -1 | 38   | 0.004176444 | 2318 | 12 | DNA helicase II                                                                                                     |
| 247 | M5005_Spy0978 | M5005_Spy0978 | 965087  | 966409  | -1 | 164  | 0.012083726 | 1323 | 16 | Na(+)-linked D-alanine glycine permease                                                                             |
| 248 | M5005_Spy0979 | M5005_Spy0979 | 964926  | 965096  | -1 | 0    | 0           | 171  | 0  | hypothetical protein                                                                                                |
| 249 | M5005_Spy0986 | glmS          | 972045  | 973859  | -1 | 0    | 0           | 1815 | 0  | glucosamine-fructose-6-phosphate aminotransferase (isomerizing)                                                     |
| 250 | M5005_Spy0988 | pyk           | 974810  | 976312  | -1 | 0    | 0           | 1503 | 0  | pyruvate kinase                                                                                                     |
| 251 | M5005_Spy0989 | pk            | 976375  | 977388  | -1 | 3    | 0.001972387 | 1014 | 2  | non-allosteric 6-phosphofructokinase                                                                                |
| 252 | M5005_Spy0990 | dnaE          | 977468  | 980578  | -1 | 3    | 0.00064288  | 3111 | 2  | DNA polymerase III alpha subunit                                                                                    |
| 253 | M5005_Spy0991 | M5005_Spy0991 | 980763  | 981134  | -1 | 53   | 0.008064516 | 372  | 3  | transcriptional regulator                                                                                           |
| 254 | M5005_Spy0994 | M5005_Spy0994 | 982254  | 983368  | -1 | 0    | 0           | 615  | 0  | putative membrane-associated alkaline phosphatase                                                                   |
| 255 | M5005_Spy1070 | dtd           | 1042897 | 1044147 | -1 | 116  | 0.003996803 | 1251 | 5  | protein precursor                                                                                                   |
| 256 | M5005_Spy1071 | M5005_Spy1071 | 1044140 | 1044379 | -1 | 0    | 0           | 240  | 0  | D-alanyl carrier protein                                                                                            |
| 257 | M5005_Spy1072 | M5005_Spy1072 | 1044397 | 1045653 | -1 | 6    | 0.00159109  | 1257 | 2  | protein DtlB                                                                                                        |
| 258 | M5005_Spy1073 | dltA          | 1046560 | 1047188 | -1 | 2    | 0.000649773 | 1539 | 1  | D-alanine-activating enzyme                                                                                         |
| 259 | M5005_Spy1074 | M5005_Spy1074 | 1047200 | 1047343 | -1 | 0    | 0           | 144  | 0  | hypothetical protein                                                                                                |
| 260 | M5005_Spy1076 | glnH          | 1049791 | 1051965 | -1 | 1    | 0.00045977  | 2175 | 1  | transporter                                                                                                         |
| 261 | M5005_Spy1077 | glnQ2         | 1051965 | 1052705 | -1 | 0    | 0           | 741  | 0  | glutamine transport ATP-binding protein                                                                             |
| 262 | M5005_Spy1088 | cbg           | 1061432 | 1062745 | -1 | 2    | 0.00152207  | 1314 | 2  | GTP-binding protein OBG family                                                                                      |
| 263 | M5005_Spy1089 | M5005_Spy1089 | 1062802 | 1062930 | -1 | 9    | 0.007751938 | 129  | 1  | hypothetical protein                                                                                                |
| 264 | M5005_Spy1103 | map           | 1076325 | 1077185 | -1 | 8    | 0.00116144  | 861  | 1  | methionine aminopeptidase                                                                                           |
| 265 | M5005_Spy1108 | metK2         | 1081717 | 1082913 | -1 | 213  | 0.005847953 | 1197 | 7  | S-adenosylmethionine synthetase                                                                                     |
| 266 | M5005_Spy1110 | birA          | 1086032 | 1086973 | -1 | 848  | 0.011677282 | 942  | 11 | biotin operon repressor/biotin-[acetyl-CoA:carboxylase] synthetase                                                  |
| 267 | M5005_Spy1112 | M5005_Spy1112 | 1087246 | 1088916 | -1 | 323  | 0.002397776 | 1671 | 4  | DNA polymerase III subunit gamma/tau                                                                                |
| 268 | M5005_Spy1113 | M5005_Spy1113 | 1088916 | 1089413 | -1 | 101  | 0.008032129 | 498  | 4  | GAF domain-containing protein                                                                                       |
| 269 | M5005_Spy1119 | gapN          | 1094052 | 1095479 | -1 | 0    | 0           | 1428 | 0  | NADP-dependent glyceraldehyde-3-phosphate dehydrogenase                                                             |
| 270 | M5005_Spy1120 | psll          | 1095664 | 1097397 | -1 | 32   | 0.007497116 | 1734 | 13 | phosphoenolpyruvate-protein phosphotransferase                                                                      |
| 271 | M5005_Spy1121 | phlH          | 1134782 | 1136173 | -1 | 0    | 0           | 264  | 0  | phosphocarrier protein HPr                                                                                          |
| 272 | M5005_Spy1122 | nrdH          | 1098058 | 1098276 | -1 | 0    | 0           | 219  | 0  | glutaredoxin                                                                                                        |
| 273 | M5005_Spy1123 | nrdE2         | 1098296 | 1100455 | -1 | 1    | 0.000462963 | 2160 | 1  | ribonucleoside-diphosphate reductase alpha chain                                                                    |
| 274 | M5005_Spy1124 | nrdF2         | 1100788 | 1101747 | -1 | 32   | 0.003125    | 960  | 3  | ribonucleoside-diphosphate reductase beta chain                                                                     |
| 275 | M5005_Spy1132 | alaS          | 1106469 | 1109087 | -1 | 5    | 0.001145475 | 2619 | 3  | alanyl-tRNA synthetase                                                                                              |
| 276 | M5005_Spy1145 | sodA          | 1121336 | 1121941 | -1 | 649  | 0.00909099  | 606  | 6  | superoxide dismutase                                                                                                |
| 277 | M5005_Spy1146 | M5005_Spy1146 | 1122038 | 1123078 | -1 | 102  | 0.002881844 | 1041 | 3  | DNA polymerase III                                                                                                  |
| 278 | M5005_Spy1149 | M5005_Spy1149 | 1126235 | 1126975 | -1 | 529  | 0.004048983 | 741  | 3  | 1-acyl-sn-glycerol-3-phosphate acyltransferase                                                                      |
| 279 | M5005_Spy1157 | trpF          | 1134782 | 1136173 | -1 | 0    | 0           | 1382 | 0  | UDP-N-acetylmuramoylalanine-D-glutamyl-L-lysine--D-alanine-D-alanine ligase                                         |
| 280 | M5005_Spy1158 | dltA          | 1136384 | 1137410 | -1 | 313  | 0.003820439 | 1047 | 4  | D-alanine-D-alanine ligase                                                                                          |
| 281 | M5005_Spy1164 | gpmA          | 1141140 | 1141835 | -1 | 7    | 0.002873563 | 696  | 2  | phosphoglycerate mutase                                                                                             |
| 282 | M5005_Spy1219 | M5005_Spy1219 | 1176548 | 1176895 | -1 | 290  | 0.002873563 | 348  | 1  | phage transcriptional regulator                                                                                     |
| 283 | M5005_Spy1230 | M5005_Spy1230 | 1185007 | 1185834 | -1 | 54   | 0.006038647 | 828  | 5  | hemolysin                                                                                                           |
| 284 | M5005_Spy1231 | fps           | 1185827 | 1186699 | -1 | 114  | 0.011454754 | 873  | 10 | dimethylallyltransferase/geranyltransferase                                                                         |
| 285 | M5005_Spy1234 | foiD          | 1188385 | 1189239 | -1 | 21   | 0.003508772 | 855  | 3  | methylentetrahydrofolate dehydrogenase (NADP+)-methyltetrahydrofolate cyclohydrolase                                |
| 286 | M5005_Spy1243 | ileS          | 1198435 | 1201236 | -1 | 744  | 0.002141328 | 2802 | 6  | isoleucyl-tRNA synthetase                                                                                           |
| 287 | M5005_Spy1244 | divIVA        | 1201509 | 1202287 | -1 | 0    | 0           | 759  | 0  | cell division initiation protein                                                                                    |
| 288 | M5005_Spy1245 | M5005_Spy1245 | 1202277 | 1203068 | -1 | 0    | 0           | 792  | 0  | RNA binding protein                                                                                                 |
| 289 | M5005_Spy1246 | M5005_Spy1246 | 1203068 | 1203322 | -1 | 0    | 0           | 255  | 0  | integral membrane protein                                                                                           |
| 290 | M5005_Spy1247 | M5005_Spy1247 | 1203327 | 1203995 | -1 | 0    | 0           | 669  | 0  | putative cytosolic protein                                                                                          |
| 291 | M5005_Spy1248 | M5005_Spy1248 | 1203995 | 1204666 | -1 | 0    | 0           | 672  | 0  | pyridoxal-5'-phosphate family protein                                                                               |
| 292 | M5005_Spy1249 | ftsZ          | 1204669 | 1205988 | -1 | 0    | 0           | 1320 | 0  | cell division protein                                                                                               |
| 293 | M5005_Spy1250 | ftsA          | 1206012 | 1207376 | -1 | 0    | 0           | 1365 | 0  | cell division protein                                                                                               |
| 294 | M5005_Spy1251 | divB          | 1207588 | 1208736 | -1 | 2    | 0.001740644 | 1149 | 2  | cell division protein                                                                                               |
| 295 | M5005_Spy1252 | murG          | 1208737 | 1209819 | -1 | 1    | 0.000923361 | 1083 | 1  | UDP-N-acetylglucosamine-N-acetylmuramyl- (pentapeptide) pyrophosphoryl-undecaprenol N-acetylglucosamine transferase |
| 296 | M5005_Spy1253 | murD          | 1209819 | 1211177 | -1 | 4    | 0.002943341 | 1359 | 4  | UDP-N-acetylmuramoylalanine--D-glutamate ligase                                                                     |
| 297 | M5005_Spy1255 | trpA          | 1211820 | 1213761 | -1 | 49   | 0.002171553 | 1842 | 4  | GTP-binding protein                                                                                                 |
| 298 | M5005_Spy1267 | M5005_Spy1267 | 1221692 | 1222183 | -1 | 3    | 0.00203252  | 492  | 1  | phosphatase/adenylyltransferase                                                                                     |
| 299 | M5005_Spy1292 | valS          | 1248383 | 1250788 | -1 | 2    | 0.000415628 | 2406 | 1  | valyl-tRNA synthetase                                                                                               |
| 300 | M5005_Spy1318 | rocA          | 1279496 | 1280851 | -1 | 62   | 0.010324484 | 1356 | 14 | sensory transduction protein kinase                                                                                 |
| 301 | M5005_Spy1321 | M5005_Spy1321 | 1283842 | 1284375 | -1 | 4    | 0.001872659 | 534  | 1  | putative cytosolic protein                                                                                          |
| 302 | M5005_Spy1330 | M5005_Spy1330 | 1296432 | 1296809 | -1 | 626  | 0.007936508 | 378  | 3  | S1-type RNA-binding domain                                                                                          |
| 303 | M5005_Spy1332 | yyvC          | 1298246 | 1298887 | -1 | 237  | 0.014018692 | 642  | 9  | two-component response regulator                                                                                    |
| 304 | M5005_Spy1335 | M5005_Spy1335 | 1300696 | 1302594 | -1 | 14   | 0.000526593 | 1699 | 1  | serine/threonine protein kinase                                                                                     |
| 305 | M5005_Spy1336 | ppp1          | 1321180 | 1324354 | -1 | 1    | 0.001949528 | 741  | 1  | protein phosphatase 2C                                                                                              |
| 306 | M5005_Spy1338 | M5005_Spy1338 | 1304681 | 1305616 | -1 | 54   | 0.002136752 | 936  | 2  | methionyl-tRNA formyltransferase                                                                                    |
| 307 | M5005_Spy1339 | prfA          | 1305678 | 1308062 | -1 | 8    | 0.001677149 | 2385 | 4  | primosomal protein N                                                                                                |
| 308 | M5005_Spy1340 | M5005_Spy1340 | 1308127 | 1308444 | -1 | 49   | 0.012578616 | 318  | 4  | DNA-directed RNA polymerase omega chain                                                                             |
| 309 | M5005_Spy1341 | gmk           | 1308460 | 1309095 | -1 | 0    | 0           | 636  | 0  | guanylate kinase                                                                                                    |
| 310 | M5005_Spy1342 | M5005_Spy1342 | 1309205 | 1310812 | -1 | 50   | 0.007462887 | 1608 | 12 | hydroxylase                                                                                                         |
| 311 | M5005_Spy1352 | M5005_Spy1352 | 1320559 | 1320885 | -1 | 1    | 0.003058104 | 327  | 1  | cell division initiation protein                                                                                    |
| 312 | M5005_Spy1353 | M5005_Spy1353 | 1321007 | 1321522 | -1 | 46   | 0.009689922 | 516  | 5  | putative cytosolic protein                                                                                          |
| 313 | M5005_Spy1354 | recJ          | 1321616 | 1322202 | -1 | 3    | 0.001696867 | 604  | 0  | recombination protein                                                                                               |
| 314 | M5005_Spy1355 | ppp1A         | 1322180 | 1324354 | -1 | 2745 | 0.012003693 | 2166 | 26 | multimodular transpeptidase-transglycosylase                                                                        |
| 315 | M5005_Spy1357 | M5005_Spy1357 | 1326343 | 1327167 | -1 | 82   | 0.002424242 | 425  | 2  | NH(3)-dependent NAD(+) synthetase                                                                                   |
| 316 | M5005_Spy1358 | nadE          | 1327169 | 1328623 | -1 | 20   | 0.002061856 | 1455 | 3  | nicotinate phosphoribosyltransferase                                                                                |
| 317 | M5005_Spy1360 | M5005_Spy1360 | 1330342 | 1331259 | -1 | 428  | 0.010893246 | 918  | 10 | thioredoxin reductase                                                                                               |
| 318 | M5005_Spy1362 | M5005_Spy1362 | 1331651 | 1332397 | -1 | 245  | 0.005354752 | 747  | 4  | transporter                                                                                                         |
| 319 | M5005_Spy1363 | M5005_Spy1363 | 1332394 | 1333197 | -1 | 0    | 0           | 804  | 0  | amino acid ABC transporter permease protein                                                                         |
| 320 | M5005_Spy1364 | M5005_Spy1364 | 1333392 | 1334735 | -1 | 6    | 0.001488095 | 1344 | 2  | ATP-dependent RNA helicase                                                                                          |
| 321 | M5005_Spy1365 | M5005_Spy1365 | 1334893 | 1335903 | -1 | 2    | 0.001978239 | 1011 | 2  | phospho-N-acetylmuramoyl-pentapeptide- transferase                                                                  |
| 322 | M5005_Spy1366 | M5005_Spy1366 | 1335905 | 1338160 | -1 | 2    | 0.00086525  | 2256 | 2  | division specific D                                                                                                 |
| 323 | M5005_Spy1367 | ftsL          | 1338164 | 1338487 | -1 | 33   | 0.00308642  | 324  | 1  | cell division protein                                                                                               |
| 324 | M5005_Spy1368 | mraW          | 1338492 | 1339505 | -1 | 9    | 0.004930966 | 1014 | 5  | S-adenosyl-methyltransferase                                                                                        |
| 325 | M5005_Spy1383 | M5005_Spy1383 | 1355848 | 1356105 | -1 | 214  | 0.011627907 | 328  | 3  | putative cytosolic protein                                                                                          |
| 326 | M5005_Spy1384 | glyS          | 1356259 | 1358298 | -1 | 6    | 0.000980392 | 2048 | 1  | glycyl-tRNA synthetase beta chain                                                                                   |
| 327 | M5005_Spy1385 | glyQ          | 1358676 | 1359933 | -1 | 1    | 0.001089325 | 918  | 1  | glycyl-tRNA synthetase alpha chain                                                                                  |
| 328 | M5005_Spy1391 | M5005_Spy1391 | 1365541 | 1366383 | -1 | 75   | 0.013048636 | 843  | 11 | degV family protein                                                                                                 |
| 329 | M5005_Spy1409 | infB          | 1379779 | 1382640 | -1 | 0    | 0           | 2862 | 0  | bacterial protein translation initiation factor 2                                                                   |
| 330 | M5005_Spy1410 | M5005_Spy1410 | 1382660 | 1382962 | -1 | 0    | 0           | 303  | 0  | LSU ribosomal protein L7AE                                                                                          |
| 331 | M5005_Spy1411 | M5005_Spy1411 | 1382955 | 1383251 | -1 | 0    | 0           | 297  | 0  | putative cytosolic protein                                                                                          |
| 332 | M5005_Spy1412 | nusA          | 1383267 | 1384424 | -1 | 1    | 0.000863558 | 1158 | 1  | N utilization substance protein A                                                                                   |
| 333 | M5005_Spy1413 | M5005_Spy1413 | 1384599 | 1385135 | -1 | 1    | 0.001862197 | 537  | 1  | putative cytosolic protein                                                                                          |
| 334 | M5005_Spy1455 | M5005_Spy1455 | 1420921 | 1421124 | -1 | 3    | 0.009803922 | 204  | 2  | phage protein                                                                                                       |
| 335 | M5005_Spy1456 | M5005_Spy1456 | 1421121 | 1421273 | -1 | 17   | 0.013071895 | 153  | 2  | phage protein                                                                                                       |
| 336 | M5005_Spy1457 | M5005_Spy1457 | 1421270 | 1421656 | -1 | 2    | 0.005167959 | 387  | 2  | phage protein                                                                                                       |
| 337 | M5005_Spy1458 | M5005_Spy1458 | 1421653 | 1421856 | -1 | 0    | 0           | 204  | 0  | phage protein                                                                                                       |
| 338 | M5005_Spy1459 | M5005_Spy1459 | 1421849 | 1422019 | -1 | 1    | 0.005847953 | 171  | 1  | phage protein                                                                                                       |
| 339 | M5005_Spy1460 | M5005_Spy1460 | 1422016 | 1422291 | -1 | 1    | 0.003623188 | 276  | 1  | phage protein                                                                                                       |
| 340 | M5005_Spy1461 | M5005_Spy1461 | 1422353 | 1422568 | -1 | 0    | 0           | 216  | 0  | phage protein                                                                                                       |
| 341 | M5005_Spy1463 | M5005_Spy1463 | 1423010 | 1423165 | -1 | 3    | 0.006410256 | 156  | 1  | phage protein                                                                                                       |
| 342 | M5005_Spy1464 | M5005_Spy1464 | 1423440 | 1423841 | -1 | 182  | 0.004975124 | 402  | 2  | phage transcriptional regulator                                                                                     |
| 343 | M5005_Spy1469 | M5005_Spy1469 | 1426829 | 1427620 | -1 | 2    | 0.001262626 | 792  | 1  | phosphotransferase enzyme family                                                                                    |
| 344 | M5005_Spy1476 | M5005_Spy1476 | 1432183 | 1432644 | -1 | 107  | 0.006493506 | 462  | 3  | ATP/GTP hydrolase                                                                                                   |
| 345 | M5005_Spy1483 | serS          | 1439369 | 1440646 | -1 | 606  | 0.006259781 | 1278 | 8  | seryl-tRNA synthetase                                                                                               |
| 346 | M5005_Spy1484 | accD          | 1440868 | 1441638 | -1 | 0    | 0           | 771  | 0  | acetyl-coenzyme A carboxylase carboxyl transferase subunit alpha                                                    |
| 347 | M5005_Spy1485 | accA          | 1441635 | 1442301 | -1 | 0    | 0           | 867  | 0  | acetyl-coenzyme A carboxylase carboxyl transferase subunit beta                                                     |
| 348 | M5005_Spy1486 | accC          | 1442510 | 1443874 | -1 | 1    | 0.0         |      |    |                                                                                                                     |

|     |               |               |         |         |    |      |             |      |    |                                                                                |
|-----|---------------|---------------|---------|---------|----|------|-------------|------|----|--------------------------------------------------------------------------------|
| 364 | M5005_Spy1507 | gatA          | 1461411 | 1462877 | -1 | 0    | 0           | 1467 | 0  | aspartyl/glutamyl-tRNA(Asn/Gln) amidotransferase subunit A                     |
| 365 | M5005_Spy1508 | gatC          | 1462877 | 1463179 | -1 | 0    | 0           | 303  | 0  | glutamyl-tRNA(Gln) amidotransferase subunit C                                  |
| 366 | M5005_Spy1512 | codY          | 1464875 | 1469567 | -1 | 147  | 0.003831418 | 783  | 3  | transcription pleiotropic repressor                                            |
| 367 | M5005_Spy1532 | acpS          | 1490763 | 1491863 | -1 | 0    | 0           | 1101 | 0  | alanine racemase                                                               |
| 368 | M5005_Spy1533 | alf           | 1491860 | 1492216 | -1 | 1    | 0.00290112  | 357  | 1  | holo-facyl-carrier protein synthase                                            |
| 369 | M5005_Spy1534 | secA          | 1492332 | 1494851 | -1 | 1    | 0.000396825 | 2520 | 1  | protein translocase subunit                                                    |
| 370 | M5005_Spy1543 | scrB          | 1503840 | 1505279 | 1  | 976  | 0.004166667 | 1440 | 6  | sucrose-6-phosphate hydrolase                                                  |
| 371 | M5005_Spy1545 | nusB          | 1506390 | 1506842 | -1 | 14   | 0.008830022 | 453  | 4  | N utilization substance protein B                                              |
| 372 | M5005_Spy1546 | M5005_Spy1546 | 1506835 | 1507224 | -1 | 0    | 0           | 390  | 0  | general stress protein                                                         |
| 373 | M5005_Spy1547 | efp           | 1507270 | 1507827 | -1 | 0    | 0           | 558  | 0  | protein translation elongation factor P                                        |
| 374 | M5005_Spy1551 | corA          | 1512638 | 1513582 | 1  | 1    | 0.001058201 | 945  | 1  | magnesium and cobalt transport protein                                         |
| 375 | M5005_Spy1553 | rpmR          | 1514504 | 1514743 | -1 | 0    | 0           | 240  | 0  | SSU ribosomal protein S18P                                                     |
| 376 | M5005_Spy1554 | spb3          | 1514908 | 1515399 | -1 | 20   | 0.004065041 | 492  | 2  | phage single-strand DNA binding protein                                        |
| 377 | M5005_Spy1555 | rpmF          | 1515421 | 1515711 | -1 | 1    | 0.003498426 | 291  | 1  | SSU ribosomal protein S6P                                                      |
| 378 | M5005_Spy1559 | trx           | 1518214 | 1518528 | -1 | 22   | 0.012698413 | 315  | 4  | thioredoxin                                                                    |
| 379 | M5005_Spy1564 | M5005_Spy1564 | 1522614 | 1523516 | 1  | 1    | 0.00110742  | 903  | 1  | ribonuclease HIII                                                              |
| 380 | M5005_Spy1565 | spi           | 1523227 | 1524120 | 1  | 101  | 0.001683502 | 594  | 1  | signal peptidase I                                                             |
| 381 | M5005_Spy1573 | gfpF2         | 1534322 | 1535170 | -1 | 118  | 0.014134276 | 849  | 12 | aquaporin                                                                      |
| 382 | M5005_Spy1591 | M5005_Spy1591 | 1549275 | 1550303 | -1 | 1    | 0.000971817 | 1029 | 1  | O-sialoglycoprotein endopeptidase                                              |
| 383 | M5005_Spy1593 | M5005_Spy1593 | 1550720 | 1551418 | -1 | 2    | 0.001430615 | 699  | 1  | glycoprotease protein family                                                   |
| 384 | M5005_Spy1594 | M5005_Spy1594 | 1551703 | 1551933 | 1  | 0    | 0           | 231  | 0  | putative transcriptional regulator                                             |
| 385 | M5005_Spy1595 | M5005_Spy1595 | 1551935 | 1553617 | 1  | 1    | 0.000594177 | 1683 | 1  | Zn-dependent hydrolase                                                         |
| 386 | M5005_Spy1596 | glnA          | 1553844 | 1555190 | -1 | 477  | 0.01484781  | 1347 | 20 | glutamine synthetase                                                           |
| 387 | M5005_Spy1597 | M5005_Spy1597 | 1555228 | 1555599 | -1 | 39   | 0.010752688 | 372  | 4  | transcriptional regulator                                                      |
| 388 | M5005_Spy1599 | pgk           | 1556480 | 1557676 | -1 | 3    | 0.002506266 | 1197 | 3  | phosphoglycerate kinase                                                        |
| 389 | M5005_Spy1602 | M5005_Spy1602 | 1560080 | 1561744 | -1 | 36   | 0.001801802 | 1665 | 3  | putative kinase related to hydroxyacetone kinase                               |
| 390 | M5005_Spy1603 | asp           | 1561744 | 1562109 | -1 | 1    | 0.00273224  | 366  | 1  | putative alkaline-shock protein                                                |
| 391 | M5005_Spy1607 | fba           | 1564157 | 1565038 | -1 | 3    | 0.003401361 | 882  | 3  | fructose-bisphosphate aldolase                                                 |
| 392 | M5005_Spy1616 | thiD          | 1572679 | 1573443 | -1 | 50   | 0.002614379 | 765  | 2  | phosphomethylpyrimidine kinase/hydroxymethylpyrimidine kinase                  |
| 393 | M5005_Spy1646 | rpsI          | 1606320 | 1608712 | -1 | 0    | 0           | 393  | 0  | SSU ribosomal protein S9P                                                      |
| 394 | M5005_Spy1647 | rplM          | 1606733 | 1607179 | -1 | 0    | 0           | 447  | 0  | LSU ribosomal protein L13P                                                     |
| 395 | M5005_Spy1655 | cysS          | 1611913 | 1613256 | -1 | 543  | 0.005952381 | 1344 | 8  | cysteinyI-tRNA synthetase                                                      |
| 396 | M5005_Spy1660 | M5005_Spy1660 | 1615328 | 1617460 | -1 | 226  | 0.009845288 | 2133 | 21 | polyribonucleotide nucleotidyltransferase                                      |
| 397 | M5005_Spy1666 | M5005_Spy1666 | 1622576 | 1622845 | -1 | 97   | 0.011111111 | 270  | 3  | SSU ribosomal protein S15P                                                     |
| 398 | M5005_Spy1669 | def           | 1623654 | 1624268 | 1  | 15   | 0.003252033 | 615  | 2  | peptide deformylase                                                            |
| 399 | M5005_Spy1672 | polC          | 1625513 | 1629910 | -1 | 1    | 0.000227376 | 4398 | 1  | DNA polymerase III alpha subunit                                               |
| 400 | M5005_Spy1673 | proS          | 1630166 | 1632021 | -1 | 607  | 0.002154012 | 1857 | 4  | prolyl-tRNA synthetase                                                         |
| 401 | M5005_Spy1674 | M5005_Spy1674 | 1632219 | 1633478 | -1 | 337  | 0.008730159 | 1260 | 11 | pheromone-processing membrane metalloprotease                                  |
| 402 | M5005_Spy1675 | cdsA          | 1633551 | 1634345 | -1 | 0    | 0           | 795  | 0  | phosphatidate cytidylyltransferase                                             |
| 403 | M5005_Spy1676 | uppS          | 1634358 | 1635107 | -1 | 0    | 0           | 750  | 0  | undecaprenyl pyrophosphate synthetase                                          |
| 404 | M5005_Spy1686 | reiA          | 1646250 | 1648469 | -1 | 9    | 0.001801802 | 2220 | 4  | GTP pyrophosphokinase/guanosine-3',5'-bis(diphosphate) 3'-pyrophosphohydrolase |
| 405 | M5005_Spy1690 | M5005_Spy1690 | 1650149 | 1650631 | 1  | 285  | 0.014492754 | 483  | 7  | nrdf.1                                                                         |
| 406 | M5005_Spy1734 | spi           | 1696679 | 1696984 | -1 | 127  | 0.009803922 | 306  | 3  | streptopain protease inhibitor                                                 |
| 407 | M5005_Spy1752 | M5005_Spy1752 | 1711754 | 1711906 | -1 | 0    | 0           | 153  | 0  | LSU ribosomal protein L33P                                                     |
| 408 | M5005_Spy1761 | groEL         | 1720962 | 1722593 | -1 | 3    | 0.00122549  | 1632 | 2  | 60 kDa chaperonin                                                              |
| 409 | M5005_Spy1762 | groES         | 1722629 | 1722961 | -1 | 1    | 0.003003003 | 333  | 1  | 10 kDa chaperonin                                                              |
| 410 | M5005_Spy1765 | csp           | 1726198 | 1728407 | -1 | 0    | 0           | 210  | 0  | cold shock protein                                                             |
| 411 | M5005_Spy1780 | rpsB          | 1746110 | 1746877 | 1  | 2    | 0.001302083 | 768  | 1  | SSU ribosomal protein S2P                                                      |
| 412 | M5005_Spy1781 | M5005_Spy1781 | 1747011 | 1748051 | 1  | 18   | 0.003842459 | 1041 | 4  | protein translation elongation factor Ts                                       |
| 413 | M5005_Spy1796 | M5005_Spy1796 | 1764579 | 1764998 | -1 | 0    | 0           | 420  | 0  | endonuclease involved in recombination                                         |
| 414 | M5005_Spy1798 | M5005_Spy1798 | 1765377 | 1765775 | -1 | 1    | 0.002506266 | 399  | 1  | arsenate reductase family protein                                              |
| 415 | M5005_Spy1802 | ruvA          | 1769201 | 1769797 | -1 | 55   | 0.008375209 | 597  | 5  | holliday junction DNA helicase                                                 |
| 416 | M5005_Spy1808 | argS          | 1776862 | 1778451 | 1  | 2292 | 0.001257862 | 1590 | 2  | arginyl-tRNA synthetase                                                        |
| 417 | M5005_Spy1812 | M5005_Spy1812 | 1780687 | 1781628 | -1 | 64   | 0.012738854 | 942  | 12 | putative membrane spanning protein                                             |
| 418 | M5005_Spy1813 | aspS          | 1781521 | 1783369 | -1 | 8    | 0.002858776 | 1749 | 5  | aspartyl-tRNA synthetase                                                       |
| 419 | M5005_Spy1814 | hisS          | 1783707 | 1784987 | -1 | 1    | 0.00078064  | 1281 | 1  | histidyl-tRNA synthetase                                                       |
| 420 | M5005_Spy1815 | rpmF          | 1785207 | 1785389 | 1  | 33   | 0.010928962 | 183  | 2  | LSU ribosomal protein L32P                                                     |
| 421 | M5005_Spy1831 | rpsD          | 1797339 | 1797950 | -1 | 2    | 0.001633987 | 612  | 1  | SSU ribosomal protein S4P                                                      |
| 422 | M5005_Spy1834 | M5005_Spy1834 | 1800006 | 1800278 | -1 | 17   | 0.007326007 | 273  | 2  | hypothetical protein                                                           |
| 423 | M5005_Spy1835 | holB          | 1800295 | 1801662 | -1 | 4    | 0.001461988 | 1368 | 2  | replicative DNA helicase                                                       |
| 424 | M5005_Spy1838 | gidA          | 1804208 | 1806106 | -1 | 147  | 0.002106372 | 1899 | 4  | glucose inhibited division protein A                                           |
| 425 | M5005_Spy1840 | trmJ          | 1807324 | 1808445 | -1 | 21   | 0.001782531 | 1122 | 2  | tRNA (5-methylaminomethyl-2-thiouridylate)-methyltransferase                   |
| 426 | M5005_Spy1844 | cbiQ          | 1811697 | 1812497 | -1 | 1    | 0.001248439 | 801  | 1  | cobalt transport protein                                                       |
| 427 | M5005_Spy1845 | cbiO2         | 1812490 | 1813332 | -1 | 0    | 0           | 843  | 0  | cobalt transport ATP-binding protein                                           |
| 428 | M5005_Spy1846 | cbiO1         | 1813308 | 1814198 | -1 | 0    | 0           | 891  | 0  | cobalt transport ATP-binding protein                                           |
| 429 | M5005_Spy1847 | M5005_Spy1847 | 1814149 | 1814691 | -1 | 2    | 0.001841621 | 543  | 1  | CDP-diaclylglycerol-glycerol-3-phosphatidyltransferase                         |
| 430 | M5005_Spy1848 | M5005_Spy1848 | 1814705 | 1815730 | -1 | 0    | 0           | 1026 | 0  | putative membrane associated protein                                           |
| 431 | M5005_Spy1858 | trsA          | 1827083 | 1828105 | -1 | 57   | 0.002932551 | 1023 | 3  | tryptophanyl-tRNA synthetase                                                   |
| 432 | M5005_Spy1859 | M5005_Spy1859 | 1828197 | 1828322 | -1 | 0    | 0           | 126  | 0  | hypothetical protein                                                           |
