# Supplementary material for: Novel Genes Required for the Fitness of Streptococcus pyogenes in Human Saliva
Source: PubMed Central journal article supplement (PMC5663985; doi:10.1128/mspheredirect.00460-17), 2017-11-01
Supplement: sph006172393st3.pdf [file sph006172393st3.pdf]

**TABLE S2 Gene mutations conferring decreased fitness after 12, 24 and 48 hour incubation with human saliva.**  
 Columns i, j, k: Comparing with other related genome-wide studies.  
 (a) Highlighted gene are found to be expressed in vivo in the monkey oropharynx. (Virtaneva et al., 2005)  
 (b) Homologous of highlighted genes are found to be required for *Pneumococcus* fitness in saliva. (Verhagen et al., 2014)  
 (c) Highlighted genes are found to be required for GAS fitness in human blood. (Le Breton, et al., 2013)

| No. | locus_tag     | gene_name     | function                                                   | Fitness in saliva, 12h | Fitness in saliva, 24h | Fitness in saliva, 48h | Expressed in NHP (a) | Pneumo fitness gene in saliva (b) | GAS fitness gene in blood (c) |
|-----|---------------|---------------|------------------------------------------------------------|------------------------|------------------------|------------------------|----------------------|-----------------------------------|-------------------------------|
|     |               |               |                                                            | Fold-change            | Fold-change            | Fold-change            |                      |                                   |                               |
| 1   | M5005_Spy0004 | M5005_Spy0004 | GTP-binding protein                                        | -1.578970785           | -1.58557353            | -1.742569733           | YES                  | YES                               |                               |
| 2   | M5005_Spy0019 | recO          | DNA repair protein                                         |                        |                        | -1.754292769           | YES                  |                                   |                               |
| 3   | M5005_Spy0085 | M5005_Spy0085 | putative DNA binding protein                               |                        |                        | -2.299023255           | YES                  |                                   |                               |
| 4   | M5005_Spy0104 | M5005_Spy0104 | tRNA-dihydrodrouidine synthase                             |                        |                        | -3.304617837           | YES                  | YES                               |                               |
| 5   | M5005_Spy0105 | M5005_Spy0105 | 33 kDa chaperone                                           |                        |                        | -2.072901471           | YES                  | YES                               |                               |
| 6   | M5005_Spy0122 | M5005_Spy0122 | putative DNA-binding protein                               |                        |                        | -2.341099429           | YES                  |                                   |                               |
| 7   | M5005_Spy0249 | oppA          | oligopeptide-binding protein                               |                        |                        | -1.737837023           | YES                  |                                   |                               |
| 8   | M5005_Spy0251 | oppC          | oligopeptide transport system permease protein             |                        |                        | -2.004743036           | YES                  | YES                               |                               |
| 9   | M5005_Spy0253 | oppF          | oligopeptide transport ATP-binding protein                 |                        |                        | -1.626716488           |                      | YES                               |                               |
| 10  | M5005_Spy0301 | M5005_Spy0301 | integral membrane protein                                  |                        |                        | -1.557764268           |                      |                                   |                               |
| 11  | M5005_Spy0327 | upp           | uracil phosphoribosyltransferase                           |                        | -1.742587365           | -1.55537654            | YES                  |                                   |                               |
| 12  | M5005_Spy0382 | msrA2         | peptide methionine sulfoxide reductase                     |                        | -1.695205174           |                        | YES                  |                                   |                               |
| 13  | M5005_Spy0401 | M5005_Spy0401 | putative cytosolic protein                                 |                        | -1.614876005           | -1.676926824           |                      |                                   |                               |
| 14  | M5005_Spy0436 | vicK          | two-component sensor histidine kinase                      | -1.700538087           | -1.684383807           |                        | YES                  |                                   |                               |
| 15  | M5005_Spy0448 | M5005_Spy0448 | hypothetical protein                                       |                        |                        | -1.821002051           | YES                  |                                   |                               |
| 16  | M5005_Spy0485 | igt           | prolipoprotein diacylglycerol transferase                  |                        |                        | -2.856429687           | YES                  | YES                               |                               |
| 17  | M5005_Spy0486 | M5005_Spy0486 | hypothetical protein                                       |                        | -1.611614426           | -2.522773501           |                      |                                   |                               |
| 18  | M5005_Spy0566 | sagE          | streptolysin S putative self-immunity protein              |                        |                        | -1.848273909           |                      |                                   |                               |
| 19  | M5005_Spy0567 | sagF          | streptolysin S biosynthesis protein                        |                        |                        | -1.564898859           | YES                  |                                   |                               |
| 20  | M5005_Spy0568 | sagG          | streptolysin S export ATP-binding protein                  | -13.89049981           | -7.982236796           | -12.05706834           | YES                  |                                   |                               |
| 21  | M5005_Spy0569 | sagH          | streptolysin S export transmembrane protein                | -11.5309895            | -13.50127029           | -750.0033792           | YES                  |                                   |                               |
| 22  | M5005_Spy0570 | sagI          | streptolysin S export transmembrane protein                | -10.44822569           | -28.60167119           | -11.59878722           | YES                  |                                   |                               |
| 23  | M5005_Spy0611 | M5005_Spy0611 | hypothetical protein                                       |                        |                        | -1.671569461           | YES                  |                                   |                               |
| 24  | M5005_Spy0630 | nfsI          | cysteine desulfhydrase                                     |                        | -1.723983908           | -22.42314591           | YES                  |                                   |                               |
| 25  | M5005_Spy0631 | thil          | thiamine biosynthesis protein                              |                        | -1.855500353           | -24.08627611           | YES                  |                                   |                               |
| 26  | M5005_Spy0642 | carA          | carbamoyl-phosphate synthase small chain                   |                        |                        | -1.549580679           | YES                  |                                   | YES                           |
| 27  | M5005_Spy0643 | carB          | carbamoyl-phosphate synthase large chain                   |                        |                        | -1.631651082           | YES                  |                                   | YES                           |
| 28  | M5005_Spy0644 | M5005_Spy0644 | periplasmic component of efflux system                     | -2.252987968           | -2.29658991            | -2.910849618           |                      |                                   |                               |
| 29  | M5005_Spy0645 | M5005_Spy0645 | ABC transporter ATP-binding protein                        | -1.87635273            | -2.005171629           | -2.721826223           | YES                  |                                   |                               |
| 30  | M5005_Spy0646 | M5005_Spy0646 | ABC transporter permease protein                           | -2.16470395            | -2.115199827           | -2.999056121           | YES                  |                                   |                               |
| 31  | M5005_Spy0665 | M5005_Spy0665 | transposase                                                |                        |                        | -1.57793436            |                      |                                   |                               |
| 32  | M5005_Spy0693 | M5005_Spy0693 | hypothetical protein                                       |                        |                        | -1.605451025           | YES                  |                                   |                               |
| 33  | M5005_Spy0718 | M5005_Spy0718 | hypothetical protein                                       |                        |                        | -1.588522263           | YES                  |                                   |                               |
| 34  | M5005_Spy0722 | miaA          | tRNA delta(2)-isopentenylpyrophosphate transferase         |                        |                        | -1.862764877           | YES                  |                                   |                               |
| 35  | M5005_Spy0805 | srtK          | nisin biosynthesis sensor protein                          |                        |                        | -1.508429525           | YES                  |                                   |                               |
| 36  | M5005_Spy0810 | srtG          | lantibiotic transport permease protein                     |                        |                        | -1.661863515           |                      |                                   |                               |
| 37  | M5005_Spy0817 | dacA1         | D-alanyl-D-alanine carboxypeptidase                        |                        |                        | -1.565288324           | YES                  |                                   |                               |
| 38  | M5005_Spy0826 | poIA          | spermidine/putrescine transport system ATP-binding protein | -1.521799626           |                        | -3.088251227           | YES                  |                                   |                               |
| 39  | M5005_Spy0829 | M5005_Spy0829 | spermidine/putrescine-binding protein                      |                        |                        | -1.946753612           |                      |                                   | YES                           |
| 40  | M5005_Spy0841 | M5005_Spy0841 | glutamine amidotransferase                                 |                        |                        | -1.633038038           | YES                  |                                   |                               |
| 41  | M5005_Spy0847 | M5005_Spy0847 | GTP pyrophosphokinase                                      | -1.697639654           | -1.566951387           |                        | YES                  |                                   |                               |
| 42  | M5005_Spy0860 | apbE          | thiamine biosynthesis lipoprotein                          | -1.535387549           | -2.002338933           |                        | YES                  |                                   |                               |
| 43  | M5005_Spy0864 | hemK          | peptide release factor-glutamine N5-methyltransferase      | -1.725261326           |                        |                        | YES                  |                                   |                               |
| 44  | M5005_Spy0872 | nox           | NADH oxidase H2O-forming                                   |                        |                        | -1.514291312           | YES                  |                                   |                               |
| 45  | M5005_Spy0926 | M5005_Spy0926 | cardiolipin synthetase                                     | -3.061011447           | -5.999314076           | -22.92056556           | YES                  | YES                               |                               |
| 46  | M5005_Spy0944 | M5005_Spy0944 | 16S rRNA m(2)G 1207 methyltransferase                      |                        |                        | -1.537389119           | YES                  |                                   |                               |
| 47  | M5005_Spy0951 | psIB          | phosphate transport ATP-binding protein                    |                        | -3.030859923           | -7.879985046           |                      | YES                               |                               |
| 48  | M5005_Spy0952 | psIB2         | phosphate transport ATP-binding protein                    | -1.636657929           | -3.627287832           | -8.2199908713          | YES                  | YES                               |                               |
| 49  | M5005_Spy0953 | psIA          | phosphate transport system permease protein                | -1.64675359            | -3.71529891            | -12.6715751            | YES                  | YES                               |                               |
| 50  | M5005_Spy0954 | psIC          | phosphate transport system permease protein                | -1.702665738           | -3.822470575           | -13.28351681           | YES                  | YES                               |                               |
| 51  | M5005_Spy0955 | psIS          | phosphate-binding protein                                  | -1.609345238           | -4.081100056           | -10.69078939           | YES                  | YES                               |                               |
| 52  | M5005_Spy0971 | M5005_Spy0971 | general stress protein, Glx24 family                       |                        | -1.658159678           | -2.48787223            | YES                  |                                   |                               |
| 53  | M5005_Spy0973 | M5005_Spy0973 | general stress protein, Glx24 family                       |                        | -1.736815972           | -1.903457746           | YES                  |                                   |                               |
| 54  | M5005_Spy0975 | M5005_Spy0975 | hypothetical protein                                       | -1.770147517           | -1.904237938           | -3.605469009           | YES                  |                                   |                               |
| 55  | M5005_Spy0987 | sipC          | signal peptidase I                                         |                        | -1.669798494           | -3.583806216           | YES                  |                                   |                               |
| 56  | M5005_Spy0992 | M5005_Spy0992 | ABC transporter ATP-binding protein                        | -2.35058252            | -2.001534524           | -2.847001093           |                      |                                   |                               |
| 57  | M5005_Spy0993 | M5005_Spy0993 | ABC transporter permease protein                           | -2.794310569           | -2.144272007           | -2.784840361           | YES                  |                                   |                               |
| 58  | M5005_Spy1021 | M5005_Spy1021 | phage protein                                              |                        |                        | -1.541202391           |                      |                                   |                               |
| 59  | M5005_Spy1023 | M5005_Spy1023 | terminase large subunit                                    |                        |                        | -1.553884241           |                      |                                   |                               |
| 60  | M5005_Spy1067 | malX          | maltose/maltodextrin-binding protein                       |                        |                        | -1.896662761           | YES                  |                                   |                               |
| 61  | M5005_Spy1068 | M5005_Spy1068 | transposase                                                |                        | -1.511512107           | -1.886032564           |                      |                                   |                               |
| 62  | M5005_Spy1075 | uvrB          | excinuclease ABC subunit B                                 |                        | -1.530782126           |                        | YES                  |                                   |                               |
| 63  | M5005_Spy1107 | murZ          | UDP-N-acetylglucosamine 1-carboxyvinyl transferase         | -1.64501845            |                        |                        | YES                  |                                   |                               |
| 64  | M5005_Spy1139 | nagB          | glucosamine-6-phosphate isomerase                          | -1.845643238           | -4.268789759           | -18.29865104           | YES                  |                                   |                               |
| 65  | M5005_Spy1182 | M5005_Spy1182 | phage protein                                              |                        |                        | -1.660660452           |                      |                                   |                               |
| 66  | M5005_Spy1226 | M5005_Spy1226 | degV family protein                                        |                        |                        | -1.548113507           |                      | YES                               |                               |
| 67  | M5005_Spy1242 | M5005_Spy1242 | putative cytosolic protein                                 | -2.396844911           | -14.18022438           | -195.1506992           | YES                  |                                   |                               |
| 68  | M5005_Spy1273 | arcB          | ornithine carbamoyltransferase                             |                        |                        | -2.494894006           | YES                  |                                   |                               |
| 69  | M5005_Spy1325 | M5005_Spy1325 | ribosome-associated factor Y                               |                        |                        | -2.14292978            |                      |                                   |                               |
| 70  | M5005_Spy1375 | tkt           | transketolase                                              | -3.496674695           | -5.730245502           | -15.59097809           | YES                  | YES                               |                               |
| 71  | M5005_Spy1381 | glpK          | glycerol kinase                                            | -1.535859342           |                        |                        | YES                  |                                   |                               |
| 72  | M5005_Spy1388 | nagA          | N-acetylglucosamine-6-phosphate deacetylase                | -1.930321315           | -7.819520774           | -148.3093522           | YES                  | YES                               |                               |
| 73  | M5005_Spy1402 | lacR1         | lactose phosphotransferase system repressor                |                        |                        | -2.57840735            | YES                  |                                   |                               |
| 74  | M5005_Spy1418 | M5005_Spy1418 | phage protein                                              |                        | -1.501932821           |                        |                      |                                   |                               |
| 75  | M5005_Spy1439 | M5005_Spy1439 | portal protein                                             |                        | -2.064830788           |                        | YES                  |                                   |                               |
| 76  | M5005_Spy1468 | M5005_Spy1468 | tRNA (m(7)G46) methyltransferase                           | -1.588241472           | -23.12331138           | -8197.940314           | YES                  |                                   |                               |
| 77  | M5005_Spy1472 | hit           | bis(5'-nucleosyl)tetraphosphatase (asymmetrical)           |                        | -1.681582108           | -2.315088687           | YES                  |                                   |                               |
| 78  | M5005_Spy1473 | M5005_Spy1473 | hypothetical protein                                       |                        |                        | -1.965495543           |                      |                                   |                               |
| 79  | M5005_Spy1479 | manL          | PTS system                                                 |                        |                        | -1.627000908           | YES                  |                                   |                               |
| 80  | M5005_Spy1480 | manM          | PTS system                                                 |                        |                        | -1.915777282           |                      |                                   |                               |
| 81  | M5005_Spy1481 | manN          | PTS system                                                 |                        |                        | -1.788676679           | YES                  |                                   | YES                           |
| 82  | M5005_Spy1519 | recG          | ATP-dependent DNA helicase                                 | -2.785545672           | -2.291381227           | -2.168312974           | YES                  |                                   |                               |
| 83  | M5005_Spy1560 | M5005_Spy1560 | phosphatidylglycerophosphatase B                           |                        | -1.51728074            | -2.310177493           | YES                  |                                   |                               |
| 84  | M5005_Spy1719 | emm1.0        | M protein                                                  |                        |                        | -1.523545262           | YES                  |                                   |                               |
| 85  | M5005_Spy1737 | rgg           | transcriptional regulator                                  |                        |                        | -1.524186201           |                      |                                   |                               |
| 86  | M5005_Spy1753 | pbp2A         | multimodular transpeptidase-transglycosylase               | -2.939159969           | -2.808870479           | -3.251429026           | YES                  | YES                               |                               |
| 87  | M5005_Spy1769 | ahpF          | peroxiredoxin reductase (NAD(P)H)                          |                        |                        | -3.048317251           |                      |                                   |                               |
| 88  | M5005_Spy1770 | hutI          | imidazolonepropionase                                      |                        |                        | -1.578855117           | YES                  |                                   |                               |
| 89  | M5005_Spy1783 | dexS          | trehalose-6-phosphate hydrolase                            |                        |                        | -2.283622667           | YES                  | YES                               |                               |
| 90  | M5005_Spy1810 | M5005_Spy1810 | putative membrane spanning protein                         |                        |                        | -3.920793404           | YES                  |                                   |                               |
| 91  | M5005_Spy1823 | M5005_Spy1823 | integral membrane protein                                  |                        |                        | -1.887367852           | YES                  |                                   |                               |
| 92  | M5005_Spy1837 | M5005_Spy1837 | phosphoesterase                                            | -3.74576977            | -18.70421192           | -163.915988            |                      |                                   |                               |
|     |               |               |                                                            |                        |                        |                        | Sum = 68             | Sum = 18                          | Sum = 4                       |
