# Supplementary material for: Novel Genes Required for the Fitness of Streptococcus pyogenes in Human Saliva
Source: PubMed Central journal article supplement (PMC5663985; doi:10.1128/mspheredirect.00460-17), 2017-11-01
Supplement: sph006172393st4.pdf [file sph006172393st4.pdf]

TABLE S3 Gene mutations conferring increased fitness after 12, 24 and 48 hour incubation with human saliva.

| No. | locus_tag     | gene name     | function                                                              | Fitness in saliva, 12h | Fitness in saliva, 24h | Fitness in saliva, 48h |
|-----|---------------|---------------|-----------------------------------------------------------------------|------------------------|------------------------|------------------------|
|     |               |               |                                                                       | Fold-change            | Fold-change            | Fold-change            |
| 1   | M5005_Spy0024 | purF          | amidophosphoribosyltransferase                                        |                        | 1.546287816            | 1.620231323            |
| 2   | M5005_Spy0077 | adcR          | transcriptional regulator, MarR family                                |                        |                        | 1.866940197            |
| 3   | M5005_Spy0153 | araD          | L-ribulose-5-phosphate 4-epimerase                                    |                        |                        | 1.560436139            |
| 4   | M5005_Spy0160 | M5005_Spy0160 | CoA binding protein                                                   |                        |                        | 1.514312702            |
| 5   | M5005_Spy0196 | M5005_Spy0196 | multidrug resistance ABC transporter ATP-binding and permease protein |                        | 1.660198805            | 2.046981293            |
| 6   | M5005_Spy0197 | M5005_Spy0197 | multidrug resistance ABC transporter ATP-binding and permease protein |                        | 1.501380503            | 1.650296122            |
| 7   | M5005_Spy0201 | M5005_Spy0201 | carbonic anhydrase                                                    |                        | 1.520079201            | 1.84580509             |
| 8   | M5005_Spy0218 | M5005_Spy0218 | N-acetylmannosamine kinase                                            |                        |                        | 1.517044391            |
| 9   | M5005_Spy0247 | M5005_Spy0247 | D-alanyl-D-alanine carboxypeptidase                                   |                        |                        | 1.714854011            |
| 10  | M5005_Spy0249 | oppA          | oligopeptide-binding protein                                          |                        | 1.502346643            |                        |
| 11  | M5005_Spy0250 | oppB          | oligopeptide transport system permease protein                        | 1.524493622            |                        |                        |
| 12  | M5005_Spy0252 | oppD          | oligopeptide transport ATP-binding protein                            |                        | 1.62410597             |                        |
| 13  | M5005_Spy0271 | M5005_Spy0271 | ABC transporter substrate-binding protein                             |                        |                        | 1.634038266            |
| 14  | M5005_Spy0272 | M5005_Spy0272 | ABC transporter ATP-binding protein                                   |                        |                        | 1.504571957            |
| 15  | M5005_Spy0273 | M5005_Spy0273 | ABC transporter permease protein                                      |                        |                        | 1.526467992            |
| 16  | M5005_Spy0300 | M5005_Spy0300 | hydrolase, HAD superfamily                                            |                        |                        | 2.329319634            |
| 17  | M5005_Spy0408 | fpg           | formamidopyrimidine-DNA glycosylase                                   |                        |                        | 1.706845388            |
| 18  | M5005_Spy0414 | M5005_Spy0414 | exoribonuclease II                                                    |                        |                        | 1.57886081             |
| 19  | M5005_Spy0418 | M5005_Spy0418 | permease                                                              |                        | 1.65667103             | 2.290059255            |
| 20  | M5005_Spy0536 | dinG          | ATP-dependent helicase                                                |                        |                        | 1.815809616            |
| 21  | M5005_Spy0539 | M5005_Spy0539 | ATP-binding protein                                                   |                        | 1.616159273            | 2.323902508            |
| 22  | M5005_Spy0701 | cpsY          | transcriptional regulator, LysR family                                |                        | 1.55009938             |                        |
| 23  | M5005_Spy0751 | acoA          | pyruvate dehydrogenase E1 component alpha subunit                     | 2.626460759            | 2.543422225            |                        |
| 24  | M5005_Spy0752 | acoB          | pyruvate dehydrogenase E1 component beta subunit                      | 2.246309539            | 2.463080347            |                        |
| 25  | M5005_Spy0781 | ptsB          | PTS system, mannose/fructose family IIB component                     |                        |                        | 1.528029417            |
| 26  | M5005_Spy0872 | nox           | NADH oxidase H2O-forming                                              | 1.585734715            |                        |                        |
| 27  | M5005_Spy0939 | M5005_Spy0939 | nucleoside transport system permease protein                          | 1.648182329            | 1.696950246            | 2.682402799            |
| 28  | M5005_Spy0940 | M5005_Spy0940 | nucleoside transport system permease protein                          | 1.651275744            | 1.751156511            | 2.872360691            |
| 29  | M5005_Spy0941 | M5005_Spy0941 | nucleoside transport ATP-binding protein                              | 1.661844082            | 1.671303782            | 2.764041275            |
| 30  | M5005_Spy0942 | M5005_Spy0942 | nucleoside-binding protein                                            |                        |                        | 2.163432682            |
| 31  | M5005_Spy0943 | cdd           | cytidine deaminase                                                    |                        | 1.523048766            | 2.209350977            |
| 32  | M5005_Spy1056 | malM          | 4-alpha-glucanotransferase                                            |                        |                        | 1.914275724            |
| 33  | M5005_Spy1061 | M5005_Spy1061 | transcriptional regulator, LacI family                                |                        |                        | 1.534836719            |
| 34  | M5005_Spy1307 | M5005_Spy1307 | putative membrane spanning protein                                    |                        |                        | 1.79063151             |
| 35  | M5005_Spy1399 | M5005_Spy1399 | PTS system, galactose-specific IIC component                          |                        | 1.954230725            | 1.723014989            |
| 36  | M5005_Spy1400 | M5005_Spy1400 | PTS system, galactose-specific IIB component                          |                        | 1.70092435             |                        |
| 37  | M5005_Spy1401 | M5005_Spy1401 | PTS system, galactose-specific IIA component                          |                        | 1.680429205            |                        |
| 38  | M5005_Spy1431 | M5005_Spy1431 | phage protein                                                         |                        |                        | 1.596824012            |
| 39  | M5005_Spy1527 | M5005_Spy1527 | ferrichrome transport system permease protein                         |                        |                        | 1.534785447            |
| 40  | M5005_Spy1538 | pmi           | mannose-6-phosphate isomerase                                         |                        |                        | 1.546254532            |
| 41  | M5005_Spy1544 | scrR          | sucrose operon repressor                                              | 1.665180925            |                        |                        |
| 42  | M5005_Spy1612 | ropA          | trigger factor, ppiase                                                |                        |                        | 1.625575913            |
| 43  | M5005_Spy1682 | msmK          | multiple sugar transport ATP-binding protein                          |                        |                        | 1.738151628            |
| 44  | M5005_Spy1683 | lrp           | leucine rich protein                                                  |                        |                        | 1.667179221            |
| 45  | M5005_Spy1692 | M5005_Spy1692 | PTS system, glucose-specific IIA component                            |                        |                        | 1.512690523            |
| 46  | M5005_Spy1699 | M5005_Spy1699 | ATPase, AAA family                                                    |                        |                        | 1.60618087             |
| 47  | M5005_Spy1726 | M5005_Spy1726 | ABC transporter permease protein                                      |                        |                        | 1.620490287            |
| 48  | M5005_Spy1727 | M5005_Spy1727 | ABC transporter ATP-binding protein                                   |                        |                        | 1.510127286            |
| 49  | M5005_Spy1728 | M5005_Spy1728 | periplasmic component of efflux system                                |                        | 1.512973768            | 1.77877113             |
| 50  | M5005_Spy1754 | M5005_Spy1754 | translation initiation inhibitor                                      |                        | 1.601589967            |                        |
| 51  | M5005_Spy1807 | argR2         | arginine repressor                                                    |                        |                        | 1.661303945            |
| 52  | M5005_Spy1818 | cadC          | cadmium efflux system accessory protein                               |                        | 1.501812564            |                        |
| 53  | M5005_Spy1857 | guaB          | inosine-5'-monophosphate dehydrogenase                                |                        |                        | 1.843457623            |
