# Supplementary material for: Novel Genes Required for the Fitness of Streptococcus pyogenes in Human Saliva
Source: PubMed Central journal article supplement (PMC5663985; doi:10.1128/mspheredirect.00460-17), 2017-11-01
Supplement: sph006172393st5.pdf [file sph006172393st5.pdf]

TABLE S4 Fitness score of each gene in the M1 GAS genome after 12 hour saliva incubation.

| locus_tag     | gene_name     | function                                                                            | Fitness score* | q.value     |
|---------------|---------------|-------------------------------------------------------------------------------------|----------------|-------------|
| M5005_Spy0004 | M5005_Spy0004 | GTP-binding protein                                                                 | -0.658984478   | 0.004613522 |
| M5005_Spy0006 | trcF          | transcription-repair coupling factor                                                | 0.152731351    | 0.022813858 |
| M5005_Spy0014 | M5005_Spy0014 | amino acid permease                                                                 | -0.244870632   | 0.002004011 |
| M5005_Spy0023 | M5005_Spy0023 | phosphoribosylformylglycinamide synthase                                            | 0.136661559    | 0.08100213  |
| M5005_Spy0024 | purF          | amidophosphoribosyltransferase                                                      | 0.142213903    | 0.086681958 |
| M5005_Spy0026 | purN          | phosphoribosylglycinamide formyltransferase                                         | 0.231280796    | 0.056654458 |
| M5005_Spy0027 | M5005_Spy0027 | phosphoribosylaminoimidazolecarboxamide formyltransferase/IMP cyclohydrolase        | 0.194261249    | 0.008249929 |
| M5005_Spy0029 | purD          | phosphoribosylamine-glycine ligase                                                  | 0.220085098    | 0.005805314 |
| M5005_Spy0033 | purB          | adenylosuccinate lyase                                                              | 0.190920835    | 0.031026832 |
| M5005_Spy0035 | ruvB          | holliday junction DNA helicase                                                      | -5.355174669   | 0.001023002 |
| M5005_Spy0077 | adcR          | transcriptional regulator, MarR family                                              | 0.326748966    | 0.088595213 |
| M5005_Spy0082 | pbp1b         | multimodular transpeptidase-transglycosylase PBP 1B                                 | -0.493376495   | 0.081891422 |
| M5005_Spy0093 | M5005_Spy0093 | adenine-specific methyltransferase                                                  | 0.169261005    | 0.016052162 |
| M5005_Spy0096 | proC          | pyrroline-5-carboxylate reductase                                                   | 0.182919464    | 0.081163703 |
| M5005_Spy0097 | pepA          | glutamyl aminopeptidase                                                             | 0.183742746    | 0.038729426 |
| M5005_Spy0103 | M5005_Spy0103 | deoxyadenosine kinase/deoxyguanosine kinase                                         | 0.211792279    | 0.044760874 |
| M5005_Spy0109 | M5005_Spy0109 | fibronectin-binding protein                                                         | 0.156437696    | 0.019843125 |
| M5005_Spy0113 | M5005_Spy0113 | transposase                                                                         | 0.177952721    | 0.061179099 |
| M5005_Spy0114 | M5005_Spy0114 | sortase                                                                             | 0.154083309    | 0.099426552 |
| M5005_Spy0122 | M5005_Spy0122 | putative DNA-binding protein                                                        | 0.271197351    | 0.009825821 |
| M5005_Spy0124 | sloR          | transcriptional regulator                                                           | 0.185873602    | 0.013162572 |
| M5005_Spy0213 | M5005_Spy0213 | N-acetylneuraminase-binding protein                                                 | 0.197142087    | 0.062727687 |
| M5005_Spy0224 | rpe           | ribulose-phosphate 3-epimerase                                                      | -0.69581883    | 0.016276004 |
| M5005_Spy0225 | M5005_Spy0225 | thiamin pyrophosphokinase                                                           | -0.883112446   | 1.36926E-06 |
| M5005_Spy0238 | bacA          | putative undecaprenol kinase                                                        | 0.218714424    | 0.079609375 |
| M5005_Spy0240 | M5005_Spy0240 | undecaprenyl-phosphate alpha-N-acetylglucosaminephosphotransferase                  | -0.999169025   | 1.16426E-18 |
| M5005_Spy0241 | rgpG          | putative cytosolic protein                                                          | -0.696209772   | 3.49051E-10 |
| M5005_Spy0245 | nifU          | iscU protein                                                                        | -0.315974812   | 0.08530506  |
| M5005_Spy0246 | M5005_Spy0246 | ABC transporter-associated protein                                                  | -0.217922814   | 0.094749046 |
| M5005_Spy0247 | M5005_Spy0247 | D-alanyl-D-alanine carboxypeptidase                                                 | 0.514367681    | 5.69884E-13 |
| M5005_Spy0249 | oppA          | oligopeptide-binding protein                                                        | 0.538718209    | 0.000276915 |
| M5005_Spy0250 | oppB          | oligopeptide transport system permease protein                                      | 0.608330115    | 0.00267604  |
| M5005_Spy0252 | oppD          | oligopeptide transport ATP-binding protein                                          | 0.529175008    | 0.002308473 |
| M5005_Spy0265 | M5005_Spy0265 | iojap protein family                                                                | 0.250462218    | 0.035573155 |
| M5005_Spy0288 | snf           | SWF/SNF family helicase                                                             | -0.436535236   | 1.10495E-07 |
| M5005_Spy0292 | M5005_Spy0292 | aminodeoxychorismate lyase family                                                   | -1.398021069   | 0.008792642 |
| M5005_Spy0297 | M5005_Spy0297 | transposase                                                                         | 0.187312822    | 0.090939043 |
| M5005_Spy0308 | M5005_Spy0308 | putative cytosolic protein                                                          | -0.577351766   | 0.000134024 |
| M5005_Spy0317 | hlyX          | putative hemolysin                                                                  | -0.208183855   | 0.023585478 |
| M5005_Spy0319 | ppaC          | manganese-dependent inorganic pyrophosphatase                                       | -2.077421416   | 0.000704562 |
| M5005_Spy0339 | exoA          | exodeoxyribonuclease III                                                            | -0.510757625   | 0.000185678 |
| M5005_Spy0362 | gcaD          | glucosamine-1-phosphate acetyltransferase/UDP-N-acetylglucosamine pyrophosphorylase | -0.713616392   | 0.049213846 |
| M5005_Spy0364 | M5005_Spy0364 | putative membrane associated protein                                                | -0.618042214   | 0.013513682 |
| M5005_Spy0384 | M5005_Spy0384 | surface antigen                                                                     | -0.225638512   | 0.008249929 |
| M5005_Spy0420 | M5005_Spy0420 | glucosyltransferase                                                                 | -0.271151013   | 0.008775124 |
| M5005_Spy0436 | vick          | two-component sensor histidine kinase                                               | -0.765991318   | 1.83718E-08 |
| M5005_Spy0439 | smc           | chromosome partition protein                                                        | -0.182969047   | 0.002909828 |
| M5005_Spy0470 | M5005_Spy0470 | hydrolase, HAD superfamily                                                          | 0.144496461    | 0.099312082 |
| M5005_Spy0486 | M5005_Spy0486 | hypothetical protein                                                                | -0.278131347   | 0.000105206 |
| M5005_Spy0499 | M5005_Spy0499 | thiamine transporter                                                                | 0.582643028    | 0.002374227 |
| M5005_Spy0516 | pacL          | calcium-transporting ATPase                                                         | -1.832712959   | 0.010438289 |
| M5005_Spy0532 | ftsX          | cell division protein                                                               | -3.095206603   | 0.000249808 |
| M5005_Spy0554 | M5005_Spy0554 | septation ring formation regulator                                                  | 1.073526865    | 0.026587383 |
| M5005_Spy0568 | sagG          | streptolysin S export ATP-binding protein                                           | -3.796026607   | 1.51349E-38 |
| M5005_Spy0569 | sagH          | streptolysin S export transmembrane protein                                         | -3.527444414   | 1.62459E-32 |
| M5005_Spy0570 | sagI          | streptolysin S export transmembrane protein                                         | -3.385186061   | 1.63633E-22 |
| M5005_Spy0609 | M5005_Spy0609 | phosphoglycerol transferase                                                         | -0.303195648   | 2.22767E-05 |
| M5005_Spy0623 | M5005_Spy0623 | methyltransferase                                                                   | -0.311312085   | 0.026274714 |
| M5005_Spy0624 | aroD          | 3-dehydroquinate dehydratase                                                        | -0.893875389   | 0.006605639 |
| M5005_Spy0628 | folC2         | folypolyglutamate synthase/dihydrofolate synthase                                   | 0.263048013    | 0.016342543 |
| M5005_Spy0642 | carA          | carbamoyl-phosphate synthase small chain                                            | -0.308985613   | 8.46644E-06 |
| M5005_Spy0643 | carB          | carbamoyl-phosphate synthase large chain                                            | -0.281185035   | 3.26425E-08 |
| M5005_Spy0644 | M5005_Spy0644 | periplasmic component of efflux system                                              | -1.171839609   | 7.71762E-93 |
| M5005_Spy0645 | M5005_Spy0645 | ABC transporter ATP-binding protein                                                 | -0.907931061   | 2.42106E-41 |
| M5005_Spy0646 | M5005_Spy0646 | ABC transporter permease protein                                                    | -1.114169732   | 5.3171E-92  |
| M5005_Spy0657 | trxB          | thioredoxin reductase                                                               | -0.950555933   | 0.08100213  |
| M5005_Spy0660 | fruR          | fructose repressor                                                                  | -0.221569848   | 0.063452252 |
| M5005_Spy0661 | fruB          | 1-phosphofructokinase                                                               | -0.400752833   | 0.016577104 |
| M5005_Spy0662 | fruA          | PTS system, fructose-specific IIABC component                                       | -0.254036683   | 0.099426552 |
| M5005_Spy0663 | mur11         | autolysin                                                                           | -0.180057752   | 0.053747552 |
| M5005_Spy0679 | M5005_Spy0679 | GTP pyrophosphokinase                                                               | -0.188759942   | 0.095871803 |
| M5005_Spy0693 | M5005_Spy0693 | hypothetical protein                                                                | 0.284637649    | 4.69155E-08 |
| M5005_Spy0715 | M5005_Spy0715 | SSU ribosomal protein S1P                                                           | 1.756768776    | 0.031196792 |
| M5005_Spy0728 | apt           | adenine phosphoribosyltransferase                                                   | 1.346037774    | 3.37325E-15 |
| M5005_Spy0740 | fbp           | fibronectin-binding protein                                                         | -0.22699608    | 0.016396718 |
| M5005_Spy0743 | M5005_Spy0743 | ABC transporter substrate-binding protein                                           | -0.181541268   | 0.038801584 |
| M5005_Spy0750 | M5005_Spy0750 | ABC transporter ATP-binding protein                                                 | -0.195195149   | 0.003735527 |
| M5005_Spy0751 | acoA          | pyruvate dehydrogenase E1 component alpha subunit                                   | 1.39312003     | 1.51782E-12 |
| M5005_Spy0752 | acoB          | pyruvate dehydrogenase E1 component beta subunit                                    | 1.167556743    | 1.20726E-05 |
| M5005_Spy0758 | lplB          | lipoate-protein ligase A                                                            | 0.389265511    | 0.06630619  |
| M5005_Spy0763 | femD          | phosphoglucosamine mutase                                                           | 0.380717368    | 0.070516093 |
| M5005_Spy0767 | M5005_Spy0767 | 4-nitrophenylphosphatase                                                            | 0.233209459    | 0.03960479  |

|               |               |                                                              |              |             |
|---------------|---------------|--------------------------------------------------------------|--------------|-------------|
| M5005_Spy0791 | uvrC          | excinuclease ABC subunit C                                   | -0.174380248 | 0.016052162 |
| M5005_Spy0817 | dacA1         | D-alanyl-D-alanine carboxypeptidase                          | -0.240331633 | 0.003926208 |
| M5005_Spy0818 | M5005_Spy0818 | polysaccharide deacetylase                                   | 0.180919149  | 0.041299878 |
| M5005_Spy0826 | potA          | spermidine/putrescine transport system ATP-binding protein   | -0.605778413 | 0.099312082 |
| M5005_Spy0838 | M5005_Spy0838 | lipase/acylhydrolase family protein                          | 0.277051007  | 0.000180968 |
| M5005_Spy0847 | M5005_Spy0847 | GTP pyrophosphokinase                                        | -0.763530261 | 0.021222749 |
| M5005_Spy0860 | apbE          | thiamine biosynthesis lipoprotein                            | -0.618602854 | 0.08270092  |
| M5005_Spy0864 | hemK          | peptide release factor-glutamine N5-methyltransferase        | -0.786814904 | 0.099739058 |
| M5005_Spy0869 | M5005_Spy0869 | antigen                                                      | -0.521323456 | 0.073355276 |
| M5005_Spy0872 | nox           | NADH oxidase H2O-forming                                     | 0.665151436  | 2.07049E-18 |
| M5005_Spy0898 | M5005_Spy0898 | 2-(5"-triphosphoribosyl)-3'-dephosphocoenzyme-A synthase     | 0.158426349  | 0.061166736 |
| M5005_Spy0906 | citE          | citrate lyase beta chain/citryl-CoA lyase subunit            | 0.201673656  | 0.002822296 |
| M5005_Spy0907 | citF          | citrate lyase alpha chain/citrate CoA-transferase            | 0.24846206   | 0.001334037 |
| M5005_Spy0925 | rmhB          | anaerobic ribonucleoside-triphosphate reductase              | -0.294058452 | 0.028749554 |
| M5005_Spy0926 | M5005_Spy0926 | cardiolipin synthetase                                       | -1.61400844  | 4.79854E-06 |
| M5005_Spy0934 | M5005_Spy0934 | lipoate-protein ligase A                                     | 0.174130379  | 0.056654458 |
| M5005_Spy0937 | M5005_Spy0937 | transporter                                                  | -0.838221881 | 0.01157833  |
| M5005_Spy0939 | M5005_Spy0939 | nucleoside transport system permease protein                 | 0.720875848  | 6.61781E-13 |
| M5005_Spy0940 | M5005_Spy0940 | nucleoside transport system permease protein                 | 0.723581053  | 3.27732E-14 |
| M5005_Spy0941 | M5005_Spy0941 | nucleoside transport ATP-binding protein                     | 0.732785031  | 9.71289E-16 |
| M5005_Spy0942 | M5005_Spy0942 | nucleoside-binding protein                                   | 0.548132533  | 1.64562E-07 |
| M5005_Spy0943 | cdd           | cytidine deaminase                                           | 0.555968977  | 4.60928E-10 |
| M5005_Spy0949 | pepN          | lysyl aminopeptidase/alanine aminopeptidase                  | 0.152310323  | 0.052092414 |
| M5005_Spy0950 | phoU          | phosphate transport system protein                           | 1.724668039  | 0.026587383 |
| M5005_Spy0951 | pstB          | phosphate transport ATP-binding protein                      | -0.570522025 | 4.16896E-16 |
| M5005_Spy0952 | pstB2         | phosphate transport ATP-binding protein                      | -0.710752821 | 4.12889E-12 |
| M5005_Spy0953 | pstA          | phosphate transport system permease protein                  | -0.719624695 | 1.35441E-24 |
| M5005_Spy0954 | pstC          | phosphate transport system permease protein                  | -0.767795237 | 1.10315E-15 |
| M5005_Spy0955 | pstS          | phosphate-binding protein                                    | -0.686473847 | 5.42317E-30 |
| M5005_Spy0970 | M5005_Spy0970 | NAD-dependent K+ or Na+ uptake system component              | -1.010507847 | 0.005041791 |
| M5005_Spy0974 | M5005_Spy0974 | small integral membrane protein                              | -0.616659397 | 0.099426552 |
| M5005_Spy0975 | M5005_Spy0975 | hypothetical protein                                         | -0.823869594 | 9.9717E-06  |
| M5005_Spy0987 | sipC          | signal peptidase I                                           | -0.521183455 | 3.60956E-15 |
| M5005_Spy0992 | M5005_Spy0992 | ABC transporter ATP-binding protein                          | -1.233018329 | 6.58789E-19 |
| M5005_Spy0993 | M5005_Spy0993 | ABC transporter permease protein                             | -1.482492376 | 1.16426E-18 |
| M5005_Spy1007 | M5005_Spy1007 | phage protein                                                | -0.13421468  | 0.062727687 |
| M5005_Spy1023 | M5005_Spy1023 | terminase large subunit                                      | 0.16483824   | 0.051754079 |
| M5005_Spy1032 | M5005_Spy1032 | phage protein                                                | -0.520937834 | 0.029146179 |
| M5005_Spy1044 | M5005_Spy1044 | phage protein                                                | 0.26785544   | 0.028749554 |
| M5005_Spy1050 | M5005_Spy1050 | phage transcriptional repressor                              | -0.81426741  | 0.00104902  |
| M5005_Spy1055 | glgP          | glycogen phosphorylase                                       | -0.464464399 | 2.53003E-20 |
| M5005_Spy1056 | malM          | 4-alpha-glucanotransferase                                   | 0.190946321  | 0.000943514 |
| M5005_Spy1057 | malR          | transcriptional regulator, LacI family                       | 0.318576906  | 6.94701E-06 |
| M5005_Spy1060 | malG          | maltose transport system permease protein                    | -0.158650552 | 0.030264184 |
| M5005_Spy1066 | amyB          | neopullulanase/cyclomaltodextrinase/maltogenic alpha-amylase | -0.319985153 | 7.87989E-08 |
| M5005_Spy1068 | M5005_Spy1068 | transposase                                                  | -0.283566789 | 0.009170186 |
| M5005_Spy1070 | ditD          | protein precursor                                            | -1.239407079 | 0.070029144 |
| M5005_Spy1075 | uvrB          | excinuclease ABC subunit B                                   | -0.434689982 | 5.03382E-06 |
| M5005_Spy1095 | M5005_Spy1095 | putative cytosolic protein                                   | 0.290339619  | 3.13717E-05 |
| M5005_Spy1099 | M5005_Spy1099 | transcriptional regulator, LytR family                       | -0.252337491 | 2.79164E-05 |
| M5005_Spy1107 | murZ          | UDP-N-acetylglucosamine 1-carboxyvinyl transferase           | -0.718103764 | 0.03062196  |
| M5005_Spy1108 | metK2         | S-adenosylmethionine synthetase                              | -1.049545437 | 0.010766061 |
| M5005_Spy1139 | nagB          | glucosamine-6-phosphate isomerase                            | -0.884123707 | 7.22728E-20 |
| M5005_Spy1226 | M5005_Spy1226 | degV family protein                                          | -0.211590973 | 0.049087055 |
| M5005_Spy1229 | argR1         | arginine repressor                                           | -0.310737406 | 0.013674358 |
| M5005_Spy1233 | M5005_Spy1233 | exodeoxyribonuclease VII large subunit                       | -0.428534745 | 0.000490899 |
| M5005_Spy1240 | clpE          | ATP-dependent clp protease ATP-binding subunit               | -0.338893935 | 2.63157E-08 |
| M5005_Spy1242 | M5005_Spy1242 | putative cytosolic protein                                   | -1.261136562 | 3.05751E-07 |
| M5005_Spy1266 | M5005_Spy1266 | ATP-dependent protease La                                    | -0.853753259 | 0.09702059  |
| M5005_Spy1272 | M5005_Spy1272 | arginine/ornithine antiporter                                | 0.228811713  | 0.002463814 |
| M5005_Spy1275 | arcA          | arginine deiminase                                           | 0.186307456  | 0.08270092  |
| M5005_Spy1314 | hyl           | hyaluronoglucoaminidase                                      | -0.175893731 | 0.035015208 |
| M5005_Spy1316 | M5005_Spy1316 | hypothetical protein                                         | -0.399198411 | 3.79037E-07 |
| M5005_Spy1317 | M5005_Spy1317 | alpha-mannosidase                                            | -0.463215344 | 6.44134E-11 |
| M5005_Spy1319 | M5005_Spy1319 | tRNA (uracil-5-)-methyltransferase                           | 0.12802925   | 0.099877694 |
| M5005_Spy1326 | comFC         | COMF operon protein 3                                        | -0.189249638 | 0.072289245 |
| M5005_Spy1328 | M5005_Spy1328 | Xaa-Pro dipeptidase                                          | 0.193375186  | 0.057161218 |
| M5005_Spy1333 | yvqE          | two-component sensor protein                                 | 0.232802719  | 0.081304282 |
| M5005_Spy1348 | M5005_Spy1348 | D-beta-hydroxybutyrate permease                              | 0.191391351  | 0.007044961 |
| M5005_Spy1349 | luxS          | autoinducer-2 production protein                             | 0.292587869  | 0.001995711 |
| M5005_Spy1356 | pepC          | aminopeptidase C                                             | 0.215706779  | 0.00315439  |
| M5005_Spy1375 | tkt           | transketolase                                                | -1.805983584 | 3.53596E-17 |
| M5005_Spy1380 | glpO          | alpha-glycerophosphate oxidase                               | 0.192995821  | 0.053747552 |
| M5005_Spy1381 | glpK          | glycerol kinase                                              | -0.619046096 | 1.0811E-11  |
| M5005_Spy1388 | nagA          | N-acetylglucosamine-6-phosphate deacetylase                  | -0.948841014 | 2.40063E-21 |
| M5005_Spy1390 | M5005_Spy1390 | hypothetical protein                                         | -0.318840945 | 0.09702059  |
| M5005_Spy1399 | M5005_Spy1399 | PTS system, galactose-specific IIC component                 | 0.466679867  | 8.21418E-11 |
| M5005_Spy1400 | M5005_Spy1400 | PTS system, galactose-specific IIB component                 | 0.583244158  | 1.16426E-18 |
| M5005_Spy1401 | M5005_Spy1401 | PTS system, galactose-specific IIA component                 | 0.445454846  | 3.82185E-06 |
| M5005_Spy1402 | lacR1         | lactose phosphotransferase system repressor                  | 0.258699263  | 0.000633075 |
| M5005_Spy1421 | M5005_Spy1421 | phage infection protein                                      | -0.186223164 | 0.016577104 |
| M5005_Spy1423 | M5005_Spy1423 | hyaluronoglucoaminidase                                      | -0.196297895 | 0.027136065 |
| M5005_Spy1424 | M5005_Spy1424 | phage endopeptidase                                          | -0.206008503 | 0.07644842  |
| M5005_Spy1439 | M5005_Spy1439 | portal protein                                               | -0.432535035 | 2.97587E-17 |
| M5005_Spy1444 | M5005_Spy1444 | adenine-specific methyltransferase                           | -0.393676418 | 0.000108112 |

|               |               |                                                |              |             |
|---------------|---------------|------------------------------------------------|--------------|-------------|
| M5005_Spy1447 | M5005_Spy1447 | phage-related DNA helicase                     | -0.255635751 | 0.057161218 |
| M5005_Spy1450 | M5005_Spy1450 | phage-encoded DNA polymerase                   | -0.412528601 | 0.005461935 |
| M5005_Spy1452 | M5005_Spy1452 | phage protein                                  | -0.870685732 | 0.072289245 |
| M5005_Spy1453 | M5005_Spy1453 | phage protein                                  | -0.320661979 | 0.038418056 |
| M5005_Spy1464 | M5005_Spy1464 | phage transcriptional regulator, Cro/Ci family | -1.254954762 | 0.006097375 |
| M5005_Spy1468 | M5005_Spy1468 | tRNA (m(7)G46) methyltransferase               | -0.667430273 | 4.42272E-07 |
| M5005_Spy1475 | M5005_Spy1475 | acetyltransferase                              | -0.242288441 | 0.080203529 |
| M5005_Spy1476 | M5005_Spy1476 | ATP/GTP hydrolase                              | -1.32669054  | 0.077911829 |
| M5005_Spy1513 | M5005_Spy1513 | aspartate aminotransferase                     | -0.347847113 | 4.59772E-08 |
| M5005_Spy1519 | recG          | ATP-dependent DNA helicase                     | -1.477959971 | 2.6649E-47  |
| M5005_Spy1543 | scrB          | sucrose-6-phosphate hydrolase                  | 0.773015774  | 3.91666E-06 |
| M5005_Spy1544 | scrR          | sucrose operon repressor                       | 0.735678937  | 3.55115E-25 |
| M5005_Spy1560 | M5005_Spy1560 | phosphatidylglycerophosphatase B               | -0.346662463 | 9.88302E-05 |
| M5005_Spy1566 | recD          | exodeoxyribonuclease V alpha chain             | -0.215257528 | 0.006097375 |
| M5005_Spy1571 | M5005_Spy1571 | c3-degrading proteinase                        | 0.215180204  | 0.001649004 |
| M5005_Spy1586 | nupC          | nucleoside permease                            | 0.161251567  | 0.029871029 |
| M5005_Spy1589 | crgR          | transcriptional regulator, GntR family         | -0.283055669 | 0.038801584 |
| M5005_Spy1611 | rpoE          | DNA-directed RNA polymerase delta chain        | 0.444206192  | 1.56602E-08 |
| M5005_Spy1617 | M5005_Spy1617 | tRNA pseudouridine synthase A                  | -1.410575605 | 0.000199844 |
| M5005_Spy1639 | lacR2         | lactose phosphotransferase system repressor    | 0.313642889  | 1.95803E-07 |
| M5005_Spy1682 | msmK          | multiple sugar transport ATP-binding protein   | -0.200717373 | 0.056813636 |
| M5005_Spy1683 | lrp           | leucine rich protein                           | -0.24189316  | 0.061166736 |
| M5005_Spy1687 | sclA          | collagen-like surface protein A                | -0.313629291 | 0.045201594 |
| M5005_Spy1719 | emm1.0        | M protein                                      | 0.280897974  | 0.008249929 |
| M5005_Spy1720 | mga           | trans-acting positive regulator                | 0.457217364  | 8.57288E-16 |
| M5005_Spy1726 | M5005_Spy1726 | ABC transporter permease protein               | 0.179580586  | 0.039698971 |
| M5005_Spy1727 | M5005_Spy1727 | ABC transporter ATP-binding protein            | 0.304511721  | 0.000305083 |
| M5005_Spy1728 | M5005_Spy1728 | periplasmic component of efflux system         | 0.28159381   | 2.38165E-05 |
| M5005_Spy1735 | speB          | streptococcal pyrogenic exotoxin B             | 0.296156622  | 9.54081E-08 |
| M5005_Spy1736 | M5005_Spy1736 | hypothetical protein                           | 0.51525382   | 0.007265281 |
| M5005_Spy1737 | rgg           | transcriptional regulator                      | 0.249339696  | 0.001945019 |
| M5005_Spy1744 | M5005_Spy1744 | PTS system, cellobiose-specific IIC component  | 0.16668779   | 0.053747552 |
| M5005_Spy1753 | pbp2A         | multimodular transpeptidase-transglycosylase   | -1.555403882 | 3.24363E-59 |
| M5005_Spy1754 | M5005_Spy1754 | translation initiation inhibitor               | 0.358163951  | 8.76587E-05 |
| M5005_Spy1770 | hutI          | imidazolonepropionase                          | -0.349788278 | 0.000349395 |
| M5005_Spy1779 | M5005_Spy1779 | transcriptional regulator, LuxR family         | 0.147536125  | 0.099312082 |
| M5005_Spy1784 | M5005_Spy1784 | PTS system, trehalose-specific IIBC component  | 0.165139415  | 0.0738986   |
| M5005_Spy1787 | M5005_Spy1787 | glyoxalase family protein                      | 0.167518665  | 0.043153018 |
| M5005_Spy1790 | M5005_Spy1790 | acetyltransferase                              | 0.350863396  | 0.03960479  |
| M5005_Spy1794 | M5005_Spy1794 | putative membrane spanning protein             | -0.465929667 | 3.56245E-07 |
| M5005_Spy1802 | ruvA          | holliday junction DNA helicase                 | -1.731745336 | 0.086681958 |
| M5005_Spy1809 | uviB          | bacteriocin                                    | 0.190499834  | 0.08100213  |
| M5005_Spy1818 | cadC          | cadmium efflux system accessory protein        | 0.283196614  | 0.010438289 |
| M5005_Spy1828 | M5005_Spy1828 | phage infection protein                        | 0.382742226  | 1.91016E-06 |
| M5005_Spy1830 | M5005_Spy1830 | transcriptional regulator, TetR family         | 0.221277378  | 0.002013881 |
| M5005_Spy1837 | M5005_Spy1837 | phosphoesterase, DHH family protein            | -1.905262228 | 1.77982E-21 |
| M5005_Spy1849 | M5005_Spy1849 | zinc protease                                  | 0.311997109  | 0.001023002 |
| M5005_Spy1850 | M5005_Spy1850 | zinc protease                                  | 0.280126642  | 0.002013881 |
| M5005_Spy1851 | hasA          | hyaluronan synthase                            | 0.146594367  | 0.099575179 |
| M5005_Spy1866 | parB          | chromosome partitioning protein                | -0.264045187 | 0.003194235 |

\* fitness score is defined as log2 fold changes in sequence read counts between input and output pools. Only genes with statistically significant change (q value < 0.1) are listed.
