# Supplementary material for: Novel Genes Required for the Fitness of Streptococcus pyogenes in Human Saliva
Source: PubMed Central journal article supplement (PMC5663985; doi:10.1128/mspheredirect.00460-17), 2017-11-01
Supplement: sph006172393st6.pdf [file sph006172393st6.pdf]

**TABLE S5 Fitness score of each gene in the M1 GAS genome after 24 hour saliva incubation.**

| locus_tag     | gene_name     | function                                                                          | Fitness score* | q.value     |
|---------------|---------------|-----------------------------------------------------------------------------------|----------------|-------------|
| M5005_Spy0004 | M5005_Spy0004 | GTP-binding protein                                                               | -0.665004783   | 0.010657001 |
| M5005_Spy0013 | ftsH          | cell division protein                                                             | -0.540255124   | 0.012515326 |
| M5005_Spy0014 | M5005_Spy0014 | amino acid permease                                                               | -0.373112573   | 1.99782E-12 |
| M5005_Spy0017 | sibA          | secreted protein                                                                  | -4.058691305   | 0.000996406 |
| M5005_Spy0022 | M5005_Spy0022 | phosphoribosylaminoimidazole-succinocarboxamide synthase                          | 0.244397101    | 0.004571132 |
| M5005_Spy0024 | purF          | amidophosphoribosyltransferase                                                    | 0.628808878    | 2.94011E-28 |
| M5005_Spy0025 | purM          | phosphoribosylformylglycinamidine cyclo-ligase                                    | 0.315246875    | 6.01592E-06 |
| M5005_Spy0029 | purD          | phosphoribosylamine-glycine ligase                                                | 0.15681278     | 0.057010926 |
| M5005_Spy0031 | purK          | phosphoribosylaminoimidazole carboxylase ATPase subunit                           | 0.184328333    | 0.070302886 |
| M5005_Spy0033 | purB          | adenylosuccinate lyase                                                            | 0.245133331    | 0.002537863 |
| M5005_Spy0036 | M5005_Spy0036 | protein tyrosine phosphatase                                                      | 1.156193535    | 0.041533509 |
| M5005_Spy0040 | adhA          | alcohol dehydrogenase                                                             | 0.315290017    | 0.00226187  |
| M5005_Spy0041 | M5005_Spy0041 | Na+ driven multidrug efflux pump                                                  | 0.185403687    | 0.006648581 |
| M5005_Spy0075 | M5005_Spy0075 | 4-diphosphocytidyl-2-C-methyl-D-erythritol kinase                                 | 0.307908538    | 0.000726122 |
| M5005_Spy0077 | adcR          | transcriptional regulator, MarR family                                            | 0.493200724    | 0.006974333 |
| M5005_Spy0084 | rpoC          | DNA-directed RNA polymerase beta' chain                                           | 0.487830148    | 0.029023215 |
| M5005_Spy0086 | comYA         | comG operon protein 1                                                             | -0.135116642   | 0.059947646 |
| M5005_Spy0093 | M5005_Spy0093 | adenine-specific methyltransferase                                                | 0.16477377     | 0.009073766 |
| M5005_Spy0094 | ackA          | acetate kinase                                                                    | -2.887494997   | 0.053003495 |
| M5005_Spy0096 | proC          | pyrroline-5-carboxylate reductase                                                 | 0.153119358    | 0.092715344 |
| M5005_Spy0097 | pepA          | glutamyl aminopeptidase                                                           | 0.156641254    | 0.028037604 |
| M5005_Spy0101 | M5005_Spy0101 | tRNA binding domain protein                                                       | 0.205864916    | 0.008029168 |
| M5005_Spy0103 | M5005_Spy0103 | deoxyadenosine kinase/deoxyguanosine kinase                                       | 0.336216853    | 0.001389716 |
| M5005_Spy0106 | rofA          | transcriptional regulator                                                         | -0.183928077   | 0.003940136 |
| M5005_Spy0107 | M5005_Spy0107 | fibronectin-binding protein                                                       | 0.186548615    | 0.005085303 |
| M5005_Spy0110 | eftL.SLB      | putative exported protein                                                         | -0.254260236   | 0.004130506 |
| M5005_Spy0112 | M5005_Spy0112 | transposase                                                                       | 0.158869452    | 0.006853968 |
| M5005_Spy0114 | M5005_Spy0114 | sortase                                                                           | 0.133647982    | 0.081416785 |
| M5005_Spy0116 | atoE          | short-chain fatty acids transporter                                               | 0.163778128    | 0.015300755 |
| M5005_Spy0117 | M5005_Spy0117 | transcriptional regulator, LysR family                                            | 0.143517086    | 0.021644626 |
| M5005_Spy0119 | M5005_Spy0119 | acetyl-CoA acetyltransferase                                                      | 0.302136411    | 5.58187E-06 |
| M5005_Spy0120 | atoD2         | acetate CoA-transferase alpha subunit                                             | 0.253294588    | 0.012515326 |
| M5005_Spy0121 | M5005_Spy0121 | acetyl-CoA:acetoacetyl-CoA transferase beta subunit                               | 0.376502453    | 0.000945219 |
| M5005_Spy0122 | M5005_Spy0122 | putative DNA-binding protein                                                      | -0.351892926   | 0.000946492 |
| M5005_Spy0123 | M5005_Spy0123 | translation initiation inhibitor                                                  | 0.42702981     | 0.030011302 |
| M5005_Spy0124 | sloR          | transcriptional regulator                                                         | 0.242733466    | 0.000420179 |
| M5005_Spy0127 | ntpK          | V-type sodium ATP synthase subunit K                                              | 0.327164728    | 0.012515326 |
| M5005_Spy0128 | ntpE          | V-type sodium ATP synthase subunit E                                              | -0.122698651   | 0.079707588 |
| M5005_Spy0132 | ntpB          | V-type sodium ATP synthase subunit B                                              | 0.225740798    | 0.003190623 |
| M5005_Spy0143 | M5005_Spy0143 | hypothetical protein                                                              | 0.461319239    | 0.0257664   |
| M5005_Spy0144 | M5005_Spy0144 | hypothetical protein                                                              | -0.341250295   | 0.073122383 |
| M5005_Spy0148 | M5005_Spy0148 | PTS system, 3-keto-L-gulonate specific IIC component                              | 0.196173265    | 0.033706494 |
| M5005_Spy0151 | M5005_Spy0151 | 3-keto-L-gulonate-6-phosphate decarboxylase                                       | -0.217634407   | 0.039844253 |
| M5005_Spy0153 | araD          | L-ribulose-5-phosphate 4-epimerase                                                | 0.448641474    | 0.00226187  |
| M5005_Spy0158 | opuABC        | glycine betaine-binding protein/glycine betaine transport system permease protein | 0.24073878     | 0.013081521 |
| M5005_Spy0161 | perR          | ferric uptake regulation protein                                                  | 0.358291756    | 0.016923119 |
| M5005_Spy0164 | M5005_Spy0164 | parB-like nuclease                                                                | -0.236067844   | 0.003656682 |
| M5005_Spy0166 | M5005_Spy0166 | transposase                                                                       | -0.213852034   | 0.098801441 |
| M5005_Spy0168 | M5005_Spy0168 | transposase                                                                       | -0.36264416    | 0.002961694 |
| M5005_Spy0169 | M5005_Spy0169 | malonate permease                                                                 | 0.254525406    | 0.000118177 |
| M5005_Spy0170 | nadC          | nicotinate-nucleotide pyrophosphorylase (carboxylating)                           | 0.155264141    | 0.068987033 |
| M5005_Spy0175 | tgt           | queuine tRNA-ribosyltransferase                                                   | 0.188055286    | 0.051073256 |
| M5005_Spy0178 | M5005_Spy0178 | metal-dependent hydrolase                                                         | 0.239175921    | 0.01251374  |
| M5005_Spy0180 | M5005_Spy0180 | S-layer homology domain                                                           | 0.143875572    | 0.053003495 |
| M5005_Spy0182 | speG          | exotoxin type G precursor                                                         | -0.207507899   | 0.020074681 |
| M5005_Spy0183 | M5005_Spy0183 | putative membrane associated protein                                              | 0.288963975    | 0.030627964 |
| M5005_Spy0196 | M5005_Spy0196 | multidrug resistance ABC transporter ATP-binding and permease protein             | 0.731356011    | 7.21887E-21 |
| M5005_Spy0197 | M5005_Spy0197 | multidrug resistance ABC transporter ATP-binding and permease protein             | 0.586289653    | 4.70347E-08 |
| M5005_Spy0201 | M5005_Spy0201 | carbonic anhydrase                                                                | 0.604146494    | 0.000777963 |
| M5005_Spy0208 | M5005_Spy0208 | 60 kDa inner membrane protein YIDC                                                | 0.378482402    | 0.003755128 |
| M5005_Spy0213 | M5005_Spy0213 | N-acetylneuraminase-binding protein                                               | 0.247023752    | 0.007658404 |
| M5005_Spy0217 | nanH          | N-acetylneuraminase lyase                                                         | 0.379657729    | 0.000337974 |
| M5005_Spy0218 | M5005_Spy0218 | N-acetylmannosamine kinase                                                        | 0.45662322     | 0.003280108 |
| M5005_Spy0224 | rpe           | ribulose-phosphate 3-epimerase                                                    | -1.297249405   | 7.60141E-06 |
| M5005_Spy0225 | M5005_Spy0225 | thiamin pyrophosphokinase                                                         | -1.155154563   | 9.11318E-08 |
| M5005_Spy0229 | prgA          | surface exclusion protein                                                         | 0.409144878    | 9.0459E-08  |
| M5005_Spy0237 | M5005_Spy0237 | putative membrane spanning protein                                                | 0.14223694     | 0.017600519 |
| M5005_Spy0238 | bacA          | putative undecaprenol kinase                                                      | 0.374255847    | 0.000436339 |
| M5005_Spy0240 | M5005_Spy0240 | undecaprenyl-phosphate alpha-N-acetylglucosaminophosphotransferase                | -0.933389105   | 1.471E-11   |
| M5005_Spy0241 | rgpG          | putative cytosolic protein                                                        | -0.479394132   | 0.001048597 |
| M5005_Spy0247 | M5005_Spy0247 | D-alanyl-D-alanine carboxypeptidase                                               | 0.549705123    | 5.26841E-16 |
| M5005_Spy0248 | dacA2         | D-alanyl-D-alanine carboxypeptidase                                               | -0.235561863   | 0.001549324 |
| M5005_Spy0249 | oppA          | oligopeptide-binding protein                                                      | 0.58721773     | 0.012623158 |
| M5005_Spy0250 | oppB          | oligopeptide transport system permease protein                                    | 0.583755139    | 0.000420179 |
| M5005_Spy0251 | oppC          | oligopeptide transport system permease protein                                    | 0.540206486    | 0.044729181 |
| M5005_Spy0252 | oppD          | oligopeptide transport ATP-binding protein                                        | 0.699645769    | 0.000160727 |
| M5005_Spy0253 | oppF          | oligopeptide transport ATP-binding protein                                        | 0.445960022    | 0.035734291 |
| M5005_Spy0266 | M5005_Spy0266 | methyltransferase                                                                 | -0.193157971   | 0.015461712 |
| M5005_Spy0267 | M5005_Spy0267 | putative cytosolic protein                                                        | 0.239579573    | 0.000479484 |
| M5005_Spy0268 | M5005_Spy0268 | hypothetical protein                                                              | -0.330037686   | 0.015976035 |

|               |               |                                                            |              |             |
|---------------|---------------|------------------------------------------------------------|--------------|-------------|
| M5005_Spy0271 | M5005_Spy0271 | ABC transporter substrate-binding protein                  | 0.398367517  | 3.80984E-13 |
| M5005_Spy0272 | M5005_Spy0272 | ABC transporter ATP-binding protein                        | 0.341832509  | 6.20946E-09 |
| M5005_Spy0273 | M5005_Spy0273 | ABC transporter permease protein                           | 0.307664351  | 1.4867E-06  |
| M5005_Spy0274 | braB          | branched-chain amino acid transport system carrier protein | 0.284865561  | 4.57064E-07 |
| M5005_Spy0278 | gidB          | glucose inhibited division protein B                       | -0.253396474 | 0.055279479 |
| M5005_Spy0279 | lemA          | LemA                                                       | 0.650278118  | 0.053003495 |
| M5005_Spy0280 | M5005_Spy0280 | heat shock protein                                         | 0.307480851  | 0.059241498 |
| M5005_Spy0288 | snf           | SWF/SNF family helicase                                    | -0.385826857 | 1.37911E-07 |
| M5005_Spy0292 | M5005_Spy0292 | aminodeoxychorismate lyase family                          | -2.934037901 | 0.026263958 |
| M5005_Spy0300 | M5005_Spy0300 | hydrolase, HAD superfamily                                 | 0.563197772  | 0.007630395 |
| M5005_Spy0306 | M5005_Spy0306 | CBS domain containing protein                              | -0.40801628  | 0.07730174  |
| M5005_Spy0308 | M5005_Spy0308 | putative cytosolic protein                                 | -0.37270861  | 0.045937634 |
| M5005_Spy0312 | M5005_Spy0312 | 23S rRNA methyltransferase                                 | 0.187842942  | 0.073238915 |
| M5005_Spy0313 | M5005_Spy0313 | riboflavin transporter                                     | -1.078108144 | 0.00396604  |
| M5005_Spy0321 | fluG          | ferrichrome transport system permease protein              | 0.139219058  | 0.053029593 |
| M5005_Spy0322 | fluB          | ferrichrome transport system permease protein              | 0.225532045  | 0.009103104 |
| M5005_Spy0326 | M5005_Spy0326 | export protein for polysaccharides and teichoic acids      | -0.599705726 | 0.001387193 |
| M5005_Spy0327 | upp           | uracil phosphoribosyltransferase                           | -0.801230988 | 1.329E-07   |
| M5005_Spy0330 | tmk           | thymidylate kinase                                         | -6.322129727 | 0.000518282 |
| M5005_Spy0335 | M5005_Spy0335 | corrin/porphyrin methyltransferase                         | 0.315595694  | 0.080103876 |
| M5005_Spy0336 | M5005_Spy0336 | putative membrane associated protein                       | -0.161633945 | 0.076731256 |
| M5005_Spy0339 | exoA          | exodeoxyribonuclease III                                   | -0.352901389 | 0.015461712 |
| M5005_Spy0340 | lctO          | L-lactate oxidase                                          | -0.176318206 | 0.03022142  |
| M5005_Spy0349 | nrde1         | ribonucleoside-diphosphate reductase alpha chain           | 0.157979372  | 0.021035449 |
| M5005_Spy0350 | M5005_Spy0350 | hypothetical protein                                       | -0.523338202 | 0.019221914 |
| M5005_Spy0354 | M5005_Spy0354 | hypothetical protein                                       | -0.243266706 | 0.018478687 |
| M5005_Spy0355 | M5005_Spy0355 | hypothetical protein                                       | -0.341615166 | 0.025342832 |
| M5005_Spy0356 | speJ          | exotoxin type J precursor                                  | -0.326584202 | 0.003845103 |
| M5005_Spy0357 | M5005_Spy0357 | hypothetical protein                                       | -0.205475642 | 0.067724702 |
| M5005_Spy0367 | scaR          | iron-dependent repressor                                   | -0.372659988 | 0.008985218 |
| M5005_Spy0373 | M5005_Spy0373 | integral membrane protein                                  | -1.168078319 | 0.006902019 |
| M5005_Spy0374 | rplK          | LSU ribosomal protein L11P                                 | 4.968094849  | 0.060683246 |
| M5005_Spy0382 | mnrA2         | peptide methionine sulfoxide reductase                     | -0.761459896 | 5.49792E-13 |
| M5005_Spy0383 | M5005_Spy0383 | D-alanyl-D-alanine carboxypeptidase                        | -0.219921483 | 0.053029593 |
| M5005_Spy0386 | phoH          | phoH protein                                               | 0.132041334  | 0.092715344 |
| M5005_Spy0392 | M5005_Spy0392 | hypothetical protein                                       | -0.265215692 | 0.084768133 |
| M5005_Spy0401 | M5005_Spy0401 | putative cytosolic protein                                 | -0.599019706 | 0.022101334 |
| M5005_Spy0404 | M5005_Spy0404 | hypothetical protein                                       | 0.216724338  | 0.080364615 |
| M5005_Spy0408 | fpg           | formamidopyrimidine-DNA glycosylase                        | 0.494796502  | 0.001830271 |
| M5005_Spy0410 | M5005_Spy0410 | ATPase                                                     | 0.243982751  | 0.000702035 |
| M5005_Spy0411 | M5005_Spy0411 | multidrug resistance protein B                             | 0.210506606  | 0.010945467 |
| M5005_Spy0414 | M5005_Spy0414 | exoribonuclease II                                         | 0.274822071  | 0.004737113 |
| M5005_Spy0418 | M5005_Spy0418 | permease                                                   | 0.728287151  | 0.028561733 |
| M5005_Spy0420 | M5005_Spy0420 | glycosyltransferase                                        | -0.322616694 | 0.000965194 |
| M5005_Spy0421 | gloA          | lactoylglutathione lyase                                   | -0.25417388  | 0.055886711 |
| M5005_Spy0427 | thrS          | threonyl-tRNA synthetase                                   | 0.730878554  | 0.010952329 |
| M5005_Spy0430 | M5005_Spy0430 | ABC transporter permease protein                           | 0.415981979  | 0.000502737 |
| M5005_Spy0431 | M5005_Spy0431 | dihydroxyacetone kinase                                    | -0.365752544 | 0.092922588 |
| M5005_Spy0432 | M5005_Spy0432 | acetyl-CoA acetyltransferase                               | 0.361952329  | 0.007609484 |
| M5005_Spy0433 | M5005_Spy0433 | long-chain-fatty-acid--CoA ligase                          | 0.196125091  | 0.045247482 |
| M5005_Spy0436 | vicK          | two-component sensor histidine kinase                      | -0.752220911 | 3.56529E-06 |
| M5005_Spy0439 | smc           | chromosome partition protein                               | -0.169939454 | 0.006974333 |
| M5005_Spy0442 | M5005_Spy0442 | putative cytosolic protein                                 | -0.2822698   | 0.03026461  |
| M5005_Spy0447 | M5005_Spy0447 | glycosyltransferase involved in cell wall biogenesis       | -0.15902536  | 0.080103876 |
| M5005_Spy0460 | M5005_Spy0460 | hypothetical protein                                       | 0.229072648  | 0.048354292 |
| M5005_Spy0462 | M5005_Spy0462 | hypothetical protein                                       | -0.269348546 | 0.009526976 |
| M5005_Spy0463 | M5005_Spy0463 | putative cytosolic protein                                 | -0.229154019 | 0.038014411 |
| M5005_Spy0466 | M5005_Spy0466 | hypothetical protein                                       | -0.418950118 | 5.16552E-06 |
| M5005_Spy0471 | M5005_Spy0471 | hydrolase, HAD superfamily                                 | 0.191271445  | 0.047828105 |
| M5005_Spy0472 | ftsY          | cell division protein                                      | -0.369328675 | 0.009752698 |
| M5005_Spy0478 | M5005_Spy0478 | putative membrane spanning protein                         | -0.18644643  | 0.012654748 |
| M5005_Spy0480 | M5005_Spy0480 | transcription accessory protein                            | 0.170608423  | 0.022216871 |
| M5005_Spy0483 | M5005_Spy0483 | stress-responsive transcriptional regulator                | 1.767840586  | 0.032316602 |
| M5005_Spy0485 | lgt           | prolipoprotein diacylglycerol transferase                  | -0.333569372 | 0.049555241 |
| M5005_Spy0486 | M5005_Spy0486 | hypothetical protein                                       | -0.688506625 | 7.42415E-25 |
| M5005_Spy0491 | M5005_Spy0491 | peptidase family U32                                       | 0.204144541  | 0.002362146 |
| M5005_Spy0498 | M5005_Spy0498 | transcriptional regulator                                  | 0.250906561  | 0.030466932 |
| M5005_Spy0513 | M5005_Spy0513 | putative cytosolic protein                                 | -0.481820775 | 1.26156E-09 |
| M5005_Spy0517 | regR          | transcriptional regulator, LacI family                     | -0.313439269 | 6.30121E-06 |
| M5005_Spy0532 | ftsX          | cell division protein                                      | -1.810786977 | 0.03511752  |
| M5005_Spy0536 | dinG          | ATP-dependent helicase                                     | 0.345617357  | 2.82347E-12 |
| M5005_Spy0539 | M5005_Spy0539 | ATP-binding protein                                        | 0.692569383  | 0.00966813  |
| M5005_Spy0542 | pepD          | dipeptidase                                                | 0.123574802  | 0.078176188 |
| M5005_Spy0545 | agaS          | galactosamine-6-phosphate deaminase (isomerizing)          | 0.198373773  | 0.003561777 |
| M5005_Spy0553 | gyrB          | DNA gyrase subunit B                                       | 5.490126719  | 0.03292876  |
| M5005_Spy0554 | M5005_Spy0554 | septation ring formation regulator                         | 0.917687423  | 0.089936639 |
| M5005_Spy0560 | M5005_Spy0560 | transcriptional regulator                                  | -0.168989421 | 0.013959393 |
| M5005_Spy0563 | sagB          | streptolysin S biosynthesis protein                        | -0.233676538 | 0.001549324 |
| M5005_Spy0567 | sagF          | streptolysin S biosynthesis protein                        | -0.292561784 | 0.00022828  |
| M5005_Spy0568 | sagG          | streptolysin S export ATP-binding protein                  | -2.996793078 | 2.80862E-12 |
| M5005_Spy0569 | sagH          | streptolysin S export transmembrane protein                | -3.755023247 | 2.38518E-19 |
| M5005_Spy0570 | sagI          | streptolysin S export transmembrane protein                | -4.838027541 | 3.35922E-06 |
| M5005_Spy0573 | lig           | NAD-dependent DNA ligase                                   | -0.962227389 | 0.063056115 |

|               |               |                                                                                           |              |             |
|---------------|---------------|-------------------------------------------------------------------------------------------|--------------|-------------|
| M5005_Spy0591 | M5005_Spy0591 | ABC transporter permease protein                                                          | -0.271919708 | 0.000118696 |
| M5005_Spy0592 | M5005_Spy0592 | ABC transporter ATP-binding protein                                                       | 0.223107764  | 0.080103876 |
| M5005_Spy0608 | rgpFc         | alpha-L-Rha alpha-1,2-L-rhamnosyltransferase/alpha-L-Rha alpha-1,3-L-rhamnosyltransferase | 0.76685673   | 0.050214614 |
| M5005_Spy0609 | M5005_Spy0609 | phosphoglycerol transferase                                                               | -0.330537792 | 2.92346E-08 |
| M5005_Spy0610 | M5005_Spy0610 | glycosyltransferase                                                                       | -0.260047575 | 0.001332251 |
| M5005_Spy0611 | M5005_Spy0611 | hypothetical protein                                                                      | -0.413316355 | 0.000118696 |
| M5005_Spy0623 | M5005_Spy0623 | methyltransferase                                                                         | -0.270538786 | 0.057240245 |
| M5005_Spy0624 | aroD          | 3-dehydroquinate dehydratase                                                              | -0.790123126 | 0.069301282 |
| M5005_Spy0625 | aroF          | chorismate synthase                                                                       | 0.164763093  | 0.06552743  |
| M5005_Spy0628 | folC2         | folylpolyglutamate synthase/dihydrofolate synthase                                        | 0.302915937  | 0.004863907 |
| M5005_Spy0630 | nifS1         | cysteine desulfhydrase                                                                    | -0.785746308 | 8.07078E-16 |
| M5005_Spy0631 | thil          | thiamine biosynthesis protein                                                             | -0.891808276 | 5.69544E-27 |
| M5005_Spy0632 | capA          | capsule biosynthesis protein                                                              | 0.248789323  | 0.00190965  |
| M5005_Spy0639 | pyrR          | pyrR bifunctional protein                                                                 | 0.288980515  | 0.080364615 |
| M5005_Spy0641 | pyrB          | aspartate carbamoyltransferase                                                            | -0.34417952  | 3.8062E-06  |
| M5005_Spy0642 | carA          | carbamoyl-phosphate synthase small chain                                                  | -0.482512662 | 9.85233E-10 |
| M5005_Spy0643 | carB          | carbamoyl-phosphate synthase large chain                                                  | -0.504546485 | 3.92332E-27 |
| M5005_Spy0644 | M5005_Spy0644 | periplasmic component of efflux system                                                    | -1.199493265 | 2.2698E-119 |
| M5005_Spy0645 | M5005_Spy0645 | ABC transporter ATP-binding protein                                                       | -1.003725727 | 5.66253E-50 |
| M5005_Spy0646 | M5005_Spy0646 | ABC transporter permease protein                                                          | -1.080793964 | 1.13135E-58 |
| M5005_Spy0650 | M5005_Spy0650 | hypothetical protein                                                                      | -0.568062657 | 0.019077018 |
| M5005_Spy0651 | M5005_Spy0651 | cell surface protein                                                                      | -0.146485771 | 0.018288297 |
| M5005_Spy0654 | M5005_Spy0654 | transcriptional regulator, TetR family                                                    | -0.158974186 | 0.081707288 |
| M5005_Spy0658 | M5005_Spy0658 | regulatory protein                                                                        | 0.250587274  | 0.003835445 |
| M5005_Spy0659 | apbA          | 2-dehydropantoate 2-reductase                                                             | -0.200916289 | 0.054447704 |
| M5005_Spy0660 | fruR          | fructose repressor                                                                        | -0.348845785 | 0.0019036   |
| M5005_Spy0663 | mur11         | autolysin                                                                                 | -0.294166996 | 0.015606729 |
| M5005_Spy0664 | mur12         | autolysin                                                                                 | -0.179426866 | 0.00226187  |
| M5005_Spy0665 | M5005_Spy0665 | transposase                                                                               | -0.54208821  | 9.04652E-05 |
| M5005_Spy0667 | M5005_Spy0667 | exotoxin type C precursor                                                                 | -0.317119474 | 0.03787804  |
| M5005_Spy0675 | M5005_Spy0675 | hypothetical protein                                                                      | -0.2935379   | 0.054896731 |
| M5005_Spy0678 | M5005_Spy0678 | 5'-nucleotidase                                                                           | -0.126810121 | 0.076743411 |
| M5005_Spy0681 | M5005_Spy0681 | two-component system histidine kinase                                                     | 0.287256033  | 5.34132E-06 |
| M5005_Spy0693 | M5005_Spy0693 | hypothetical protein                                                                      | -0.278946483 | 4.92321E-08 |
| M5005_Spy0697 | arsC          | arsenate reductase family protein                                                         | -0.886984646 | 0.015161945 |
| M5005_Spy0700 | cpsX          | attenuator of transcription, LytR family regulator                                        | 0.19235965   | 0.080103876 |
| M5005_Spy0701 | cpsY          | transcriptional regulator, LysR family                                                    | 0.632360713  | 1.37813E-09 |
| M5005_Spy0703 | pyrF          | orotidine 5'-phosphate decarboxylase                                                      | 0.223381483  | 0.012394136 |
| M5005_Spy0716 | M5005_Spy0716 | hypothetical protein                                                                      | -0.249001769 | 0.054833279 |
| M5005_Spy0719 | M5005_Spy0719 | glutathione S-transferase                                                                 | 0.189793287  | 0.02035695  |
| M5005_Spy0720 | M5005_Spy0720 | putative exfoliative toxin                                                                | 0.231721192  | 0.00226187  |
| M5005_Spy0721 | M5005_Spy0721 | hypothetical protein                                                                      | -0.490745007 | 0.00838298  |
| M5005_Spy0722 | miaA          | tRNA delta(2)-isopentenylpyrophosphate transferase                                        | -0.558768581 | 8.84514E-07 |
| M5005_Spy0728 | apt           | adenine phosphoribosyltransferase                                                         | 1.254715727  | 7.31515E-08 |
| M5005_Spy0730 | nth           | endonuclease III                                                                          | 0.456694225  | 0.009967812 |
| M5005_Spy0732 | M5005_Spy0732 | NIF3-related protein                                                                      | 0.300362579  | 0.064528984 |
| M5005_Spy0736 | cpsFQ         | dTDP-glucose 4,6-dehydratase                                                              | -0.882496835 | 0.093633876 |
| M5005_Spy0742 | M5005_Spy0742 | hypothetical protein                                                                      | -0.315158479 | 0.067323966 |
| M5005_Spy0743 | M5005_Spy0743 | ABC transporter substrate-binding protein                                                 | 0.184722158  | 0.039844253 |
| M5005_Spy0745 | M5005_Spy0745 | ABC transporter permease protein                                                          | 0.222893679  | 0.073831208 |
| M5005_Spy0749 | M5005_Spy0749 | hypothetical protein                                                                      | -0.281725548 | 0.019110027 |
| M5005_Spy0751 | acoA          | pyruvate dehydrogenase E1 component alpha subunit                                         | 1.346770979  | 8.82618E-12 |
| M5005_Spy0752 | acoB          | pyruvate dehydrogenase E1 component beta subunit                                          | 1.30046369   | 2.18003E-05 |
| M5005_Spy0763 | femD          | phosphoglucosamine mutase                                                                 | 0.434777412  | 0.035989381 |
| M5005_Spy0767 | M5005_Spy0767 | 4-nitrophenylphosphatase                                                                  | 0.311027581  | 0.000362317 |
| M5005_Spy0772 | M5005_Spy0772 | hypothetical protein                                                                      | -0.199714385 | 0.097893876 |
| M5005_Spy0776 | lepA          | GTP-binding protein                                                                       | 0.218927122  | 0.059896994 |
| M5005_Spy0779 | M5005_Spy0779 | putative membrane spanning protein                                                        | -0.116513698 | 0.051658108 |
| M5005_Spy0780 | M5005_Spy0780 | PTS system, mannose/fructose family IIA component                                         | 0.365181175  | 0.012493001 |
| M5005_Spy0781 | ptsB          | PTS system, mannose/fructose family IIB component                                         | 0.238802692  | 0.038826054 |
| M5005_Spy0783 | ptsD          | PTS system, mannose/fructose family IID component                                         | 0.318703918  | 0.004175881 |
| M5005_Spy0784 | M5005_Spy0784 | two-component sensor kinase                                                               | -0.165988277 | 0.010618701 |
| M5005_Spy0785 | M5005_Spy0785 | two-component response regulator                                                          | 0.176926985  | 0.089936639 |
| M5005_Spy0790 | gabD          | succinate-semialdehyde dehydrogenase [NADP+]                                              | -0.277852605 | 0.009302731 |
| M5005_Spy0791 | uvrC          | excinuclease ABC subunit C                                                                | -0.490818006 | 9.94957E-15 |
| M5005_Spy0792 | M5005_Spy0792 | NAD(P)H-dependent quinone reductase                                                       | -4.591449118 | 0.000403352 |
| M5005_Spy0793 | M5005_Spy0793 | Xaa-His dipeptidase                                                                       | 0.49924245   | 1.44978E-05 |
| M5005_Spy0797 | M5005_Spy0797 | hypothetical protein                                                                      | -0.472591467 | 0.038826054 |
| M5005_Spy0803 | srtI          | protein involved in lantibiotic production                                                | -0.113585198 | 0.062580786 |
| M5005_Spy0804 | srtR          | nisin biosynthesis two-component response regulator                                       | -0.364818885 | 7.43452E-07 |
| M5005_Spy0805 | srtK          | nisin biosynthesis sensor protein                                                         | -0.409132164 | 1.19398E-05 |
| M5005_Spy0806 | srtA          | lantibiotic precursor                                                                     | -0.30336635  | 0.005448808 |
| M5005_Spy0807 | srtT          | ABC transporter (ATP binding)-lantibiotic associated                                      | -0.172830249 | 0.028614514 |
| M5005_Spy0808 | srtF          | lantibiotic transport ATP-binding protein                                                 | -0.147961448 | 0.034461155 |
| M5005_Spy0809 | srtE          | lantibiotic transport permease protein                                                    | -0.195167556 | 0.035288119 |
| M5005_Spy0810 | srtG          | lantibiotic transport permease protein                                                    | -0.419005932 | 0.000241508 |
| M5005_Spy0817 | dacA1         | D-alanyl-D-alanine carboxypeptidase                                                       | -0.287211373 | 0.001332251 |
| M5005_Spy0820 | folC1         | folylpolyglutamate synthase/dihydrofolate synthase                                        | -4.717898063 | 0.003090914 |
| M5005_Spy0829 | M5005_Spy0829 | spermidine/putrescine-binding protein                                                     | -0.477750882 | 0.053029593 |
| M5005_Spy0830 | dpiA          | transcriptional regulatory protein                                                        | -0.165461731 | 0.023340543 |
| M5005_Spy0832 | malP          | malate-sodium symport                                                                     | 0.129759918  | 0.047608087 |
| M5005_Spy0835 | M5005_Spy0835 | class B acid phosphatase                                                                  | -0.149166912 | 0.02332191  |
| M5005_Spy0838 | M5005_Spy0838 | lipase/acylhydrolase family protein                                                       | -0.251130081 | 0.001983269 |

|               |               |                                                                 |              |             |
|---------------|---------------|-----------------------------------------------------------------|--------------|-------------|
| M5005_Spy0840 | radC          | DNA repair protein                                              | -0.156673248 | 0.031269306 |
| M5005_Spy0841 | M5005_Spy0841 | glutamine amidotransferase, class I                             | -0.317951282 | 0.028997701 |
| M5005_Spy0847 | M5005_Spy0847 | GTP pyrophosphokinase                                           | -0.638723899 | 0.03903346  |
| M5005_Spy0852 | M5005_Spy0852 | short chain dehydrogenase                                       | -0.30914668  | 0.008138086 |
| M5005_Spy0858 | xpt           | xanthine phosphoribosyltransferase                              | -0.201371271 | 0.012493001 |
| M5005_Spy0860 | apbE          | thiamine biosynthesis lipoprotein                               | -1.001686198 | 0.023885916 |
| M5005_Spy0872 | nox           | NADH oxidase H2O-forming                                        | 0.174444631  | 0.015461712 |
| M5005_Spy0874 | gyrA          | DNA gyrase subunit A                                            | -0.987238492 | 0.021907198 |
| M5005_Spy0876 | M5005_Spy0876 | lactoylglutathione lyase                                        | -0.248641795 | 0.00183013  |
| M5005_Spy0878 | M5005_Spy0878 | hypothetical protein                                            | -0.191887855 | 0.045937634 |
| M5005_Spy0884 | smf           | Smf                                                             | -0.161746767 | 0.043837925 |
| M5005_Spy0886 | M5005_Spy0886 | transcriptional regulator, LysR family                          | -0.156037626 | 0.024270271 |
| M5005_Spy0887 | M5005_Spy0887 | transcriptional regulator, LysR family                          | -0.344860984 | 0.000273569 |
| M5005_Spy0892 | satE          | SatE                                                            | 0.158971492  | 0.073831208 |
| M5005_Spy0893 | gid           | glucose inhibited division protein A                            | 0.191298547  | 0.023340543 |
| M5005_Spy0894 | oadA2         | oxaloacetate decarboxylase alpha chain                          | 0.136770458  | 0.068694134 |
| M5005_Spy0895 | M5005_Spy0895 | putative membrane associated protein                            | -0.267701647 | 0.021926363 |
| M5005_Spy0899 | citG          | transcriptional regulator, GntR family                          | -0.155940452 | 0.016254912 |
| M5005_Spy0900 | M5005_Spy0900 | Mg2+/citrate complex secondary transporter                      | -0.112199025 | 0.086037306 |
| M5005_Spy0902 | M5005_Spy0902 | biotin carboxyl carrier protein of oxaloacetate decarboxylase   | 0.204535818  | 0.065627356 |
| M5005_Spy0903 | oadB          | oxaloacetate decarboxylase beta chain                           | 0.306661003  | 0.001004456 |
| M5005_Spy0906 | citE          | citrate lyase beta chain/citryl-CoA lyase subunit               | 0.152234138  | 0.021283451 |
| M5005_Spy0907 | citF          | citrate lyase alpha chain/citrate CoA-transferase               | 0.291146128  | 2.75204E-06 |
| M5005_Spy0908 | citX          | apo-citrate lyase phosphoribosyl-dephospho-CoA transferase      | 0.144659069  | 0.034413833 |
| M5005_Spy0909 | oadA1         | oxaloacetate decarboxylase alpha chain                          | 0.169435659  | 0.006628769 |
| M5005_Spy0911 | M5005_Spy0911 | hypothetical protein                                            | -0.141584281 | 0.078601573 |
| M5005_Spy0914 | M5005_Spy0914 | phage transcriptional repressor                                 | -0.177700247 | 0.009103104 |
| M5005_Spy0918 | M5005_Spy0918 | hypothetical protein                                            | -0.243234013 | 0.000729209 |
| M5005_Spy0921 | M5005_Spy0921 | ABC transporter ATP-binding protein                             | -0.121444385 | 0.056554657 |
| M5005_Spy0923 | M5005_Spy0923 | pyridoxine kinase                                               | -0.216548825 | 0.001150693 |
| M5005_Spy0925 | rnhB          | anaerobic ribonucleoside-triphosphate reductase                 | -0.354341446 | 0.003599192 |
| M5005_Spy0926 | M5005_Spy0926 | cardiolipin synthetase                                          | -2.584797561 | 4.41145E-12 |
| M5005_Spy0929 | M5005_Spy0929 | SIR2 family protein                                             | 0.1953777    | 0.029218989 |
| M5005_Spy0931 | M5005_Spy0931 | glycine cleavage system H protein                               | 0.300217169  | 0.069753844 |
| M5005_Spy0934 | M5005_Spy0934 | lipote-protein ligase A                                         | 0.205622966  | 0.012216566 |
| M5005_Spy0937 | M5005_Spy0937 | transporter                                                     | -1.570665731 | 0.001714623 |
| M5005_Spy0938 | pgmA          | phosphoglucomutase/phosphomannomutase                           | -0.495373701 | 0.005765678 |
| M5005_Spy0939 | M5005_Spy0939 | nucleoside transport system permease protein                    | 0.762944266  | 1.16149E-24 |
| M5005_Spy0940 | M5005_Spy0940 | nucleoside transport system permease protein                    | 0.808308031  | 5.71726E-26 |
| M5005_Spy0941 | M5005_Spy0941 | nucleoside transport ATP-binding protein                        | 0.740973987  | 5.71726E-26 |
| M5005_Spy0942 | M5005_Spy0942 | nucleoside-binding protein                                      | 0.517779639  | 1.17283E-11 |
| M5005_Spy0943 | cdd           | cytidine deaminase                                              | 0.606962135  | 9.0459E-08  |
| M5005_Spy0944 | M5005_Spy0944 | 16S rRNA m(2)G 1207 methyltransferase                           | -0.46763997  | 3.28147E-13 |
| M5005_Spy0947 | ciaH          | sensor protein                                                  | -0.289342227 | 0.000723319 |
| M5005_Spy0949 | pepN          | lysyl aminopeptidase/alanine aminopeptidase                     | 0.189947281  | 0.006829623 |
| M5005_Spy0951 | pstB          | phosphate transport ATP-binding protein                         | -1.599727177 | 7.7655E-100 |
| M5005_Spy0952 | pstB2         | phosphate transport ATP-binding protein                         | -1.85889123  | 5.07094E-53 |
| M5005_Spy0953 | pstA          | phosphate transport system permease protein                     | -1.893478286 | 1.7075E-162 |
| M5005_Spy0954 | pstC          | phosphate transport system permease protein                     | -1.934505396 | 1.37154E-65 |
| M5005_Spy0955 | pstS          | phosphate-binding protein                                       | -2.028958081 | 2.6174E-112 |
| M5005_Spy0961 | truB          | tRNA pseudouridine synthase B                                   | -1.471604692 | 0.003736548 |
| M5005_Spy0970 | M5005_Spy0970 | NAD-dependent K+ or Na+ uptake system component                 | -1.421419043 | 0.002161896 |
| M5005_Spy0971 | M5005_Spy0971 | general stress protein, Gls24 family                            | -0.729582942 | 9.50436E-05 |
| M5005_Spy0972 | M5005_Spy0972 | hypothetical protein                                            | -0.74247025  | 0.051969253 |
| M5005_Spy0973 | M5005_Spy0973 | general stress protein, Gls24 family                            | -0.796444899 | 1.99619E-07 |
| M5005_Spy0975 | M5005_Spy0975 | hypothetical protein                                            | -0.929213758 | 4.86128E-06 |
| M5005_Spy0980 | M5005_Spy0980 | cobalt-zinc-cadmium resistance protein                          | -0.213823413 | 0.038826054 |
| M5005_Spy0981 | cfa           | cAMP factor                                                     | -0.248755992 | 0.000414249 |
| M5005_Spy0982 | M5005_Spy0982 | histidine-binding protein                                       | -0.186238825 | 0.023885916 |
| M5005_Spy0986 | glmS          | glucosamine-fructose-6-phosphate aminotransferase (isomerizing) | 5.006626723  | 0.058546555 |
| M5005_Spy0987 | sipC          | signal peptidase I                                              | -0.739674013 | 1.81062E-27 |
| M5005_Spy0992 | M5005_Spy0992 | ABC transporter ATP-binding protein                             | -1.0011065   | 4.48554E-11 |
| M5005_Spy0993 | M5005_Spy0993 | ABC transporter permease protein                                | -1.100487928 | 1.66809E-09 |
| M5005_Spy0995 | M5005_Spy0995 | phage protein                                                   | -0.369379627 | 0.023340543 |
| M5005_Spy0999 | M5005_Spy0999 | phage protein                                                   | 0.192884927  | 0.020757093 |
| M5005_Spy1000 | M5005_Spy1000 | phage protein                                                   | -0.220096914 | 0.001418424 |
| M5005_Spy1001 | M5005_Spy1001 | phage-associated cell wall hydrolase                            | 0.290821588  | 0.006171991 |
| M5005_Spy1003 | M5005_Spy1003 | phage protein                                                   | -0.388171259 | 8.61926E-05 |
| M5005_Spy1006 | M5005_Spy1006 | phage structural protein                                        | -0.153974239 | 0.027782755 |
| M5005_Spy1021 | M5005_Spy1021 | phage protein                                                   | -0.254826936 | 0.0001313   |
| M5005_Spy1022 | M5005_Spy1022 | portal protein                                                  | -0.163801909 | 0.021926363 |
| M5005_Spy1023 | M5005_Spy1023 | terminase large subunit                                         | -0.241228951 | 0.000337722 |
| M5005_Spy1044 | M5005_Spy1044 | phage protein                                                   | -0.352452909 | 0.011597364 |
| M5005_Spy1046 | M5005_Spy1046 | phage protein                                                   | -0.184063525 | 0.093573571 |
| M5005_Spy1050 | M5005_Spy1050 | phage transcriptional repressor                                 | -0.871526387 | 0.001036328 |
| M5005_Spy1051 | M5005_Spy1051 | phage protein                                                   | -0.200203681 | 0.019927209 |
| M5005_Spy1055 | glgP          | glycogen phosphorylase                                          | -0.390985413 | 3.2408E-15  |
| M5005_Spy1056 | malM          | 4-alpha-glucanotransferase                                      | 0.546280281  | 1.79676E-29 |
| M5005_Spy1057 | malR          | transcriptional regulator, Lacl family                          | 0.470840295  | 8.3561E-12  |
| M5005_Spy1058 | malE          | maltose/maltodextrin-binding protein                            | 0.125967292  | 0.03903346  |
| M5005_Spy1061 | M5005_Spy1061 | transcriptional regulator, Lacl family                          | 0.433144416  | 1.47207E-16 |
| M5005_Spy1063 | malD          | maltodextrin transport system permease protein                  | 0.147614539  | 0.079707588 |
| M5005_Spy1064 | malC          | maltose transport system permease protein                       | -0.135381425 | 0.028997701 |

|               |               |                                                                                 |              |             |
|---------------|---------------|---------------------------------------------------------------------------------|--------------|-------------|
| M5005_Spy1065 | amyA          | alpha-amylase                                                                   | -0.150486893 | 0.020663041 |
| M5005_Spy1066 | amyB          | neopullulanase/cyclomaltodextrinase/maltogenic alpha-amylase                    | -0.270234517 | 3.92313E-06 |
| M5005_Spy1067 | malX          | maltose/maltodextrin-binding protein                                            | -0.419161272 | 9.7197E-15  |
| M5005_Spy1068 | M5005_Spy1068 | transposase                                                                     | -0.595992535 | 2.14565E-09 |
| M5005_Spy1069 | M5005_Spy1069 | esterase                                                                        | -0.185810681 | 0.004770442 |
| M5005_Spy1070 | dltD          | protein precursor                                                               | -2.754178196 | 0.000432419 |
| M5005_Spy1075 | uvrB          | excinuclease ABC subunit B                                                      | -0.614268961 | 8.46179E-13 |
| M5005_Spy1081 | M5005_Spy1081 | PTS system, cellobiose-specific IIA component                                   | 0.211330964  | 0.062755564 |
| M5005_Spy1085 | bglA2         | beta-glucosidase                                                                | 0.225321267  | 0.001714623 |
| M5005_Spy1086 | M5005_Spy1086 | nicotinamide mononucleotide transporter                                         | 0.125600052  | 0.075730336 |
| M5005_Spy1094 | M5005_Spy1094 | transporter, MFS superfamily                                                    | 0.26784177   | 0.003823032 |
| M5005_Spy1097 | M5005_Spy1097 | phosphorylase, Pnp/Udp family                                                   | 0.241880353  | 0.020179413 |
| M5005_Spy1099 | M5005_Spy1099 | transcriptional regulator, LytR family                                          | -0.371112968 | 7.64254E-11 |
| M5005_Spy1102 | M5005_Spy1102 | ribonuclease BN                                                                 | -0.29608233  | 0.039666652 |
| M5005_Spy1108 | metK2         | S-adenosylmethionine synthetase                                                 | -1.470981694 | 0.003090914 |
| M5005_Spy1110 | birA          | biotin operon repressor/biotin--[acetyl-CoA-carboxylase] synthetase             | -0.595948793 | 0.030466932 |
| M5005_Spy1115 | M5005_Spy1115 | putative membrane spanning protein                                              | -0.252840367 | 0.028614514 |
| M5005_Spy1116 | udk           | uridine kinase                                                                  | -0.286922827 | 0.012623158 |
| M5005_Spy1119 | gapN          | NADP-dependent glyceraldehyde-3-phosphate dehydrogenase                         | 5.807651869  | 0.020074681 |
| M5005_Spy1120 | pstI          | phosphoenolpyruvate-protein phosphotransferase                                  | -3.011272175 | 0.006719284 |
| M5005_Spy1133 | surA          | peptidyl-prolyl cis-trans isomerase                                             | -0.39763532  | 0.000388025 |
| M5005_Spy1139 | nagB          | glucosamine-6-phosphate isomerase                                               | -2.093827111 | 2.88467E-45 |
| M5005_Spy1147 | comEC         | COME operon protein 3                                                           | 0.148873576  | 0.01593488  |
| M5005_Spy1151 | M5005_Spy1151 | hypothetical protein with endo/excinuclease domain                              | -0.261493392 | 0.00193561  |
| M5005_Spy1152 | M5005_Spy1152 | kup system potassium uptake protein                                             | 0.128619751  | 0.028614514 |
| M5005_Spy1155 | prfC          | bacterial peptide chain release factor 3 (RF-3)                                 | 0.357879816  | 0.009073766 |
| M5005_Spy1157 | murF          | UDP-N-acetylmuramoylalanine-D-glutamyl-L-lysine-- D-alanyl-D-alanine ligase     | 6.719714196  | 0.013461377 |
| M5005_Spy1159 | recR          | recombination protein                                                           | -1.280897205 | 0.096045264 |
| M5005_Spy1167 | M5005_Spy1167 | lead, cadmium, zinc and mercury transporting ATPase                             | 0.199057926  | 0.022427384 |
| M5005_Spy1170 | M5005_Spy1170 | putative membrane associated protein                                            | -0.340661019 | 8.2749E-05  |
| M5005_Spy1173 | M5005_Spy1173 | phage protein                                                                   | -0.510577256 | 0.04034404  |
| M5005_Spy1184 | M5005_Spy1184 | phage protein                                                                   | -0.297235957 | 0.065808657 |
| M5005_Spy1188 | M5005_Spy1188 | phage protein                                                                   | 0.207693425  | 0.070456533 |
| M5005_Spy1193 | M5005_Spy1193 | phage protein                                                                   | -0.139853802 | 0.020393212 |
| M5005_Spy1198 | M5005_Spy1198 | phage protein                                                                   | -0.2460794   | 0.042029066 |
| M5005_Spy1205 | M5005_Spy1205 | phage protein                                                                   | -0.530447481 | 0.031023338 |
| M5005_Spy1212 | xis           | excisionase                                                                     | -0.283754226 | 0.001323835 |
| M5005_Spy1215 | M5005_Spy1215 | phage protein                                                                   | 0.240319288  | 0.081897455 |
| M5005_Spy1220 | M5005_Spy1220 | phage protein                                                                   | -0.217194686 | 0.001032325 |
| M5005_Spy1222 | int2          | integrase                                                                       | -0.145201209 | 0.020774348 |
| M5005_Spy1223 | M5005_Spy1223 | DNA-binding protein HU                                                          | -0.786453801 | 0.048158486 |
| M5005_Spy1226 | M5005_Spy1226 | degV family protein                                                             | -0.166376836 | 0.083125274 |
| M5005_Spy1229 | argR1         | arginine repressor                                                              | -0.287412646 | 0.070161556 |
| M5005_Spy1238 | artQ          | arginine transport system permease protein                                      | 0.335345657  | 7.87538E-05 |
| M5005_Spy1239 | M5005_Spy1239 | putative cytosolic protein                                                      | -5.991188884 | 8.52842E-06 |
| M5005_Spy1240 | clpE          | ATP-dependent clp protease ATP-binding subunit                                  | -0.311334502 | 2.68547E-05 |
| M5005_Spy1241 | mutT          | mutator protein (7,8-dihydro-8-oxoguanine-triphosphatase)                       | 0.306965042  | 1.40526E-06 |
| M5005_Spy1242 | M5005_Spy1242 | putative cytosolic protein                                                      | -3.825808456 | 3.99866E-18 |
| M5005_Spy1257 | glcK          | glucokinase/Xylose repressor                                                    | 0.463168135  | 0.000616995 |
| M5005_Spy1259 | dpr           | non-specific DNA-binding protein/iron-binding ferritin-like antioxidant protein | 0.54163315   | 0.026754736 |
| M5005_Spy1261 | M5005_Spy1261 | radical SAM family enzyme                                                       | -0.277455862 | 0.000143065 |
| M5005_Spy1269 | asnA          | aspartate--ammonia ligase                                                       | -0.324396241 | 0.00022588  |
| M5005_Spy1271 | M5005_Spy1271 | Xaa-His dipeptidase                                                             | 0.355033327  | 6.96162E-06 |
| M5005_Spy1272 | M5005_Spy1272 | arginine/ornithine antiporter                                                   | 0.34567922   | 2.73948E-10 |
| M5005_Spy1274 | M5005_Spy1274 | acetyltransferase                                                               | 0.352489823  | 0.062755564 |
| M5005_Spy1275 | arcA          | arginine deiminase                                                              | 0.432105002  | 4.41244E-11 |
| M5005_Spy1276 | M5005_Spy1276 | transcription regulator, crp family                                             | 0.242779764  | 0.001036328 |
| M5005_Spy1277 | ahrC2         | arginine repressor                                                              | 0.384121152  | 0.001365761 |
| M5005_Spy1278 | M5005_Spy1278 | hypothetical protein                                                            | 0.405186181  | 0.000362317 |
| M5005_Spy1279 | M5005_Spy1279 | putative cytosolic protein                                                      | 0.303346171  | 0.000263411 |
| M5005_Spy1280 | M5005_Spy1280 | two-component sensor kinase                                                     | 0.119234668  | 0.086037306 |
| M5005_Spy1287 | M5005_Spy1287 | hypothetical protein                                                            | 0.381899297  | 0.00033272  |
| M5005_Spy1292 | valS          | valyl-tRNA synthetase                                                           | 3.391011069  | 0.074713922 |
| M5005_Spy1299 | M5005_Spy1299 | hypothetical protein                                                            | 0.908935502  | 0.060043898 |
| M5005_Spy1304 | lacZ          | beta-galactosidase                                                              | 0.137980874  | 0.048679478 |
| M5005_Spy1305 | M5005_Spy1305 | two-component response regulator                                                | 0.205269508  | 0.040222719 |
| M5005_Spy1306 | M5005_Spy1306 | two-component sensor kinase                                                     | 0.132984775  | 0.059241498 |
| M5005_Spy1307 | M5005_Spy1307 | putative membrane spanning protein                                              | 0.368399167  | 0.046731974 |
| M5005_Spy1308 | M5005_Spy1308 | sugar-binding protein                                                           | 0.145471244  | 0.053891616 |
| M5005_Spy1309 | M5005_Spy1309 | sugar transport system permease protein                                         | 0.354242186  | 0.000513027 |
| M5005_Spy1314 | hyl           | hyaluronoglucosaminidase                                                        | -0.227328213 | 0.014696612 |
| M5005_Spy1316 | M5005_Spy1316 | hypothetical protein                                                            | -0.128551022 | 0.085160895 |
| M5005_Spy1317 | M5005_Spy1317 | alpha-mannosidase                                                               | -0.245505003 | 0.001387193 |
| M5005_Spy1325 | M5005_Spy1325 | ribosome-associated factor Y                                                    | -0.221347596 | 0.041573651 |
| M5005_Spy1326 | comFC         | COMF operon protein 3                                                           | -0.372110262 | 2.10923E-06 |
| M5005_Spy1330 | M5005_Spy1330 | S1-type RNA-binding domain                                                      | -0.74692518  | 0.075490492 |
| M5005_Spy1335 | M5005_Spy1335 | serine/threonine protein kinase                                                 | -6.585073438 | 0.006793532 |
| M5005_Spy1337 | sunL          | 16S rRNA m(5)C 967 methyltransferase                                            | 0.239694789  | 0.053003495 |
| M5005_Spy1348 | M5005_Spy1348 | D-beta-hydroxybutyrate permease                                                 | 0.14496096   | 0.047084545 |
| M5005_Spy1349 | luxS          | autoinducer-2 production protein                                                | 0.343853044  | 0.004009047 |
| M5005_Spy1355 | pbp1A         | multimodular transpeptidase-transglycosylase                                    | -0.357965209 | 0.017686211 |
| M5005_Spy1359 | M5005_Spy1359 | amino acid permease                                                             | -0.304658981 | 0.01702493  |
| M5005_Spy1367 | ftsL          | cell division protein                                                           | -4.551689394 | 0.000108524 |

|               |               |                                                                 |              |             |
|---------------|---------------|-----------------------------------------------------------------|--------------|-------------|
| M5005_Spy1368 | mraW          | S-adenosyl-methyltransferase                                    | 1.67930909   | 0.090073585 |
| M5005_Spy1372 | proB          | ABC transporter permease protein                                | 0.133261314  | 0.058546555 |
| M5005_Spy1373 | M5005_Spy1373 | ABC transporter ATP-binding protein                             | -0.356746012 | 3.41443E-06 |
| M5005_Spy1375 | tkl           | transketolase                                                   | -2.51859695  | 3.09045E-34 |
| M5005_Spy1380 | glpO          | alpha-glycerophosphate oxidase                                  | 0.291621409  | 0.001966032 |
| M5005_Spy1381 | glpK          | glycerol kinase                                                 | -0.387105112 | 0.000176667 |
| M5005_Spy1388 | nagA          | N-acetylglucosamine-6-phosphate deacetylase                     | -2.967080193 | 9.81928E-67 |
| M5005_Spy1399 | M5005_Spy1399 | PTS system, galactose-specific IIC component                    | 0.966600808  | 9.68348E-46 |
| M5005_Spy1400 | M5005_Spy1400 | PTS system, galactose-specific IIB component                    | 0.766318977  | 6.56928E-56 |
| M5005_Spy1401 | M5005_Spy1401 | PTS system, galactose-specific IIA component                    | 0.748829764  | 7.90408E-17 |
| M5005_Spy1402 | lacR1         | lactose phosphotransferase system repressor                     | -0.553815332 | 4.66666E-15 |
| M5005_Spy1407 | M5005_Spy1407 | esterase                                                        | 0.19769693   | 0.000922219 |
| M5005_Spy1415 | sdaD2         | phage-encoded streptodornase                                    | -0.465311301 | 1.02888E-19 |
| M5005_Spy1418 | M5005_Spy1418 | phage protein                                                   | -0.586820285 | 1.06578E-08 |
| M5005_Spy1424 | M5005_Spy1424 | phage endopeptidase                                             | -0.24846314  | 0.005541929 |
| M5005_Spy1429 | M5005_Spy1429 | phage protein                                                   | 0.723358181  | 0.037713588 |
| M5005_Spy1432 | M5005_Spy1432 | phage protein                                                   | -0.242009298 | 0.067313007 |
| M5005_Spy1434 | M5005_Spy1434 | phage protein                                                   | -0.134451994 | 0.064042121 |
| M5005_Spy1439 | M5005_Spy1439 | portal protein                                                  | -1.046023558 | 2.75952E-94 |
| M5005_Spy1440 | M5005_Spy1440 | terminase large subunit                                         | -0.26903225  | 0.01702493  |
| M5005_Spy1444 | M5005_Spy1444 | adenine-specific methyltransferase                              | -0.483602884 | 1.22193E-05 |
| M5005_Spy1445 | M5005_Spy1445 | phage protein                                                   | -3.11670764  | 0.0019036   |
| M5005_Spy1447 | M5005_Spy1447 | phage-related DNA helicase                                      | -0.36668461  | 0.001549324 |
| M5005_Spy1450 | M5005_Spy1450 | phage-encoded DNA polymerase                                    | -0.392703831 | 0.001036328 |
| M5005_Spy1452 | M5005_Spy1452 | phage protein                                                   | -1.357985539 | 0.002521384 |
| M5005_Spy1453 | M5005_Spy1453 | phage protein                                                   | -0.52535912  | 0.000867075 |
| M5005_Spy1456 | M5005_Spy1456 | phage protein                                                   | -5.865683189 | 0.007275635 |
| M5005_Spy1459 | M5005_Spy1459 | phage protein                                                   | 4.948664617  | 0.070190509 |
| M5005_Spy1462 | M5005_Spy1462 | phage protein                                                   | -3.37461592  | 0.002345239 |
| M5005_Spy1467 | int3          | integrase                                                       | 0.162128269  | 0.028614514 |
| M5005_Spy1468 | M5005_Spy1468 | tRNA (m(7)G46) methyltransferase                                | -4.531276109 | 2.1863E-104 |
| M5005_Spy1472 | hit           | bis(5'-nucleosyl)-tetraphosphatase (asymmetrical)               | -0.749819225 | 3.43726E-29 |
| M5005_Spy1473 | M5005_Spy1473 | hypothetical protein                                            | -0.416631681 | 0.093032464 |
| M5005_Spy1479 | manL          | PTS system, mannose-specific IAB component                      | -0.297216685 | 0.003410052 |
| M5005_Spy1481 | manN          | PTS system, mannose-specific IID component                      | -0.23871645  | 0.003859713 |
| M5005_Spy1485 | accA          | acetyl-coenzyme A carboxylase carboxyl transferase subunit beta | 5.150732112  | 0.053003495 |
| M5005_Spy1498 | dnaK          | chaperone protein                                               | -2.761056382 | 0.073631479 |
| M5005_Spy1505 | M5005_Spy1505 | hypothetical protein                                            | 0.231450181  | 0.019244545 |
| M5005_Spy1512 | codY          | transcription pleiotropic repressor                             | -2.430113697 | 0.046340261 |
| M5005_Spy1513 | M5005_Spy1513 | aspartate aminotransferase                                      | -0.291579792 | 5.6449E-05  |
| M5005_Spy1515 | M5005_Spy1515 | hydrolase, HAD superfamily                                      | 0.151260986  | 0.035734291 |
| M5005_Spy1516 | asnB          | L-asparaginase                                                  | 0.266714114  | 0.047444226 |
| M5005_Spy1519 | recG          | ATP-dependent DNA helicase                                      | -1.196217506 | 7.00861E-22 |
| M5005_Spy1527 | M5005_Spy1527 | ferrichrome transport system permease protein                   | 0.362243739  | 0.007434617 |
| M5005_Spy1528 | M5005_Spy1528 | ferrichrome-binding protein                                     | 0.225701691  | 0.035989381 |
| M5005_Spy1531 | isp2          | immunogenic secreted protein                                    | 0.147449983  | 0.042690936 |
| M5005_Spy1538 | pmi           | mannose-6-phosphate isomerase                                   | 0.549596975  | 0.000337974 |
| M5005_Spy1543 | scrB          | sucrose-6-phosphate hydrolase                                   | 0.58307602   | 0.008441112 |
| M5005_Spy1544 | scrR          | sucrose operon repressor                                        | 0.424628928  | 1.48977E-09 |
| M5005_Spy1546 | M5005_Spy1546 | general stress protein, Gls24 family                            | 4.610387445  | 0.096298826 |
| M5005_Spy1554 | ssb3          | phage single-strand DNA binding protein                         | -2.883450906 | 0.016433127 |
| M5005_Spy1556 | M5005_Spy1556 | hypothetical protein                                            | -0.295605182 | 0.078666556 |
| M5005_Spy1558 | M5005_Spy1558 | transcriptional regulator                                       | -0.183045694 | 0.055279479 |
| M5005_Spy1560 | M5005_Spy1560 | phosphatidylglycerophosphatase B                                | -0.601488049 | 4.68211E-12 |
| M5005_Spy1561 | mutS2         | DNA mismatch repair protein                                     | -0.318372284 | 1.31956E-06 |
| M5005_Spy1566 | recD          | exodeoxyribonuclease V alpha chain                              | -0.198012638 | 0.003992761 |
| M5005_Spy1569 | pfl           | formate acetyltransferase                                       | 0.219644111  | 0.051658108 |
| M5005_Spy1571 | M5005_Spy1571 | c3-degrading proteinase                                         | 0.158398807  | 0.012028133 |
| M5005_Spy1575 | norA          | quinolone resistance protein                                    | 0.288128283  | 0.070372434 |
| M5005_Spy1583 | M5005_Spy1583 | putative cytosolic protein                                      | -0.689740143 | 0.06131078  |
| M5005_Spy1585 | deoC          | deoxyribose-phosphate aldolase                                  | -0.176406289 | 0.008518949 |
| M5005_Spy1586 | nupC          | nucleoside permease                                             | 0.210194156  | 0.00127592  |
| M5005_Spy1595 | M5005_Spy1595 | Zn-dependent hydrolase                                          | 4.136269425  | 0.046803536 |
| M5005_Spy1607 | fbp           | fructose-bisphosphate aldolase                                  | 3.187168475  | 0.068861964 |
| M5005_Spy1608 | M5005_Spy1608 | alpha/beta hydrolase                                            | -0.305972667 | 0.025041831 |
| M5005_Spy1611 | rpoE          | DNA-directed RNA polymerase delta chain                         | -1.062584944 | 8.28587E-39 |
| M5005_Spy1612 | ropA          | trigger factor, ppiase                                          | 0.537905124  | 0.005470417 |
| M5005_Spy1617 | M5005_Spy1617 | tRNA pseudouridine synthase A                                   | -1.687984388 | 0.000853296 |
| M5005_Spy1620 | M5005_Spy1620 | glycerate kinase                                                | 0.186255087  | 0.074439808 |
| M5005_Spy1625 | salR          | transcriptional regulatory protein                              | -0.213017119 | 0.004571132 |
| M5005_Spy1626 | M5005_Spy1626 | sensory transduction protein kinase                             | -0.201910317 | 0.025361034 |
| M5005_Spy1628 | M5005_Spy1628 | ABC transporter ATP-binding protein                             | -0.155640457 | 0.068694134 |
| M5005_Spy1636 | lacC2         | tagatose-6-phosphate kinase                                     | -0.235748911 | 0.001214377 |
| M5005_Spy1637 | lacB2         | galactose-6-phosphate isomerase lacB subunit                    | -0.184879789 | 0.0884185   |
| M5005_Spy1638 | lacA2         | galactose-6-phosphate isomerase lacA subunit                    | -0.466057228 | 1.1464E-09  |
| M5005_Spy1639 | lacR2         | lactose phosphotransferase system repressor                     | 0.442227619  | 3.26984E-16 |
| M5005_Spy1641 | M5005_Spy1641 | putative cytosolic protein                                      | -0.193258928 | 0.030466932 |
| M5005_Spy1653 | M5005_Spy1653 | putative membrane associated protein                            | -0.178210109 | 0.056205149 |
| M5005_Spy1654 | M5005_Spy1654 | hypothetical protein                                            | 0.218946555  | 0.027782755 |
| M5005_Spy1658 | cysE          | serine acetyltransferase                                        | 0.284746722  | 0.021035449 |
| M5005_Spy1660 | M5005_Spy1660 | polyribonucleotide nucleotidyltransferase                       | 1.21659417   | 0.007300065 |
| M5005_Spy1661 | M5005_Spy1661 | transaldolase                                                   | 0.320638041  | 0.012028133 |
| M5005_Spy1664 | M5005_Spy1664 | transcription antiterminator, BglG family                       | 0.129232287  | 0.033876806 |

|               |               |                                                      |              |             |
|---------------|---------------|------------------------------------------------------|--------------|-------------|
| M5005_Spy1666 | M5005_Spy1666 | SSU ribosomal protein S15P                           | 1.26756869   | 0.044442389 |
| M5005_Spy1678 | M5005_Spy1678 | thioredoxin                                          | 0.532943513  | 0.042744784 |
| M5005_Spy1683 | lrp           | leucine rich protein                                 | 0.26514934   | 0.054447704 |
| M5005_Spy1684 | ska           | streptokinase                                        | -0.167414356 | 0.00396604  |
| M5005_Spy1692 | M5005_Spy1692 | PTS system, glucose-specific IIBC component          | 0.22754629   | 0.004130506 |
| M5005_Spy1695 | M5005_Spy1695 | ribosomal protein L11 methyltransferase              | 0.378942638  | 0.039960084 |
| M5005_Spy1699 | M5005_Spy1699 | ATPase, AAA family                                   | 0.438937934  | 3.33963E-07 |
| M5005_Spy1701 | flaR          | DNA topology modulation protein flar-related protein | 0.219567905  | 0.002521455 |
| M5005_Spy1704 | dppA          | dipeptide-binding protein                            | 0.169272735  | 0.016433127 |
| M5005_Spy1706 | dppC          | dipeptide transport system permease protein          | 0.311227603  | 0.000724689 |
| M5005_Spy1709 | M5005_Spy1709 | hypothetical protein                                 | 0.609290595  | 0.076397832 |
| M5005_Spy1716 | M5005_Spy1716 | transposase                                          | 0.285978288  | 0.000215362 |
| M5005_Spy1723 | isp           | immunogenic secreted protein                         | 0.187114534  | 0.014814538 |
| M5005_Spy1726 | M5005_Spy1726 | ABC transporter permease protein                     | 0.41960124   | 1.14975E-10 |
| M5005_Spy1727 | M5005_Spy1727 | ABC transporter ATP-binding protein                  | 0.456661447  | 3.48731E-11 |
| M5005_Spy1728 | M5005_Spy1728 | periplasmic component of efflux system               | 0.597386975  | 1.89224E-25 |
| M5005_Spy1733 | M5005_Spy1733 | hypothetical protein                                 | -0.327011341 | 0.00396604  |
| M5005_Spy1734 | spi           | streptopain protease inhibitor                       | -1.306111591 | 0.055924712 |
| M5005_Spy1737 | rgg           | transcriptional regulator                            | -0.287939227 | 5.13485E-05 |
| M5005_Spy1741 | gldA          | glycerol dehydrogenase                               | 0.301455488  | 0.006304499 |
| M5005_Spy1744 | M5005_Spy1744 | PTS system, cellobiose-specific IIC component        | 0.318130964  | 5.43431E-06 |
| M5005_Spy1747 | M5005_Spy1747 | sorbitol operon regulator                            | 0.173643909  | 0.04604258  |
| M5005_Spy1748 | M5005_Spy1748 | transcriptional regulator, DeoR family               | -0.229936107 | 0.003190623 |
| M5005_Spy1749 | M5005_Spy1749 | pyruvate formate-lyase activating enzyme             | 0.184752698  | 0.081288026 |
| M5005_Spy1753 | pbp2A         | multimodular transpeptidase-transglycosylase         | -1.489990102 | 1.67134E-39 |
| M5005_Spy1754 | M5005_Spy1754 | translation initiation inhibitor                     | 0.679504841  | 1.75313E-20 |
| M5005_Spy1758 | M5005_Spy1758 | putative dipeptidase B                               | 0.166753885  | 0.020774348 |
| M5005_Spy1770 | hutI          | imidazolonepropionase                                | -0.394015218 | 1.09926E-06 |
| M5005_Spy1771 | hutU          | urocanate hydratase                                  | 0.265960905  | 0.000724689 |
| M5005_Spy1772 | M5005_Spy1772 | glutamate formiminotransferase                       | 0.276809073  | 4.05381E-06 |
| M5005_Spy1779 | M5005_Spy1779 | transcriptional regulator, LuxR family               | 0.261823917  | 8.61926E-05 |
| M5005_Spy1783 | dexS          | trehalose-6-phosphate hydrolase                      | -0.412219696 | 0.031653124 |
| M5005_Spy1784 | M5005_Spy1784 | PTS system, trehalose-specific IIBC component        | 0.199426863  | 0.012515326 |
| M5005_Spy1787 | M5005_Spy1787 | glyoxalase family protein                            | 0.184634433  | 0.004600307 |
| M5005_Spy1788 | yaaA          | protein yaaA                                         | 0.271256921  | 0.001549324 |
| M5005_Spy1794 | M5005_Spy1794 | putative membrane spanning protein                   | -0.249876842 | 0.011433773 |
| M5005_Spy1795 | M5005_Spy1795 | putative cytosolic protein                           | -1.000465879 | 0.01862386  |
| M5005_Spy1799 | recA          | RecA                                                 | -0.69730192  | 0.089030926 |
| M5005_Spy1802 | ruvA          | holliday junction DNA helicase                       | -2.752251314 | 0.02362407  |
| M5005_Spy1805 | mutS          | DNA mismatch repair protein                          | -0.172856862 | 0.016835327 |
| M5005_Spy1807 | argR2         | arginine repressor                                   | 0.540279525  | 0.001549324 |
| M5005_Spy1808 | argS          | arginyl-tRNA synthetase                              | -0.434441451 | 0.011862309 |
| M5005_Spy1810 | M5005_Spy1810 | putative membrane spanning protein                   | -0.57868553  | 5.24865E-20 |
| M5005_Spy1811 | M5005_Spy1811 | putative membrane spanning protein                   | -0.37349165  | 0.053447917 |
| M5005_Spy1813 | aspS          | aspartyl-tRNA synthetase                             | -4.834405166 | 0.059571138 |
| M5005_Spy1815 | rpmF          | LSU ribosomal protein L32P                           | -6.916976722 | 0.001147592 |
| M5005_Spy1817 | cadD          | cadmium resistance protein                           | 0.199311254  | 0.023764653 |
| M5005_Spy1818 | cadC          | cadmium efflux system accessory protein              | 0.586704766  | 6.96365E-09 |
| M5005_Spy1820 | M5005_Spy1820 | ftsK/SpoIIIE family                                  | 0.308328803  | 0.002005886 |
| M5005_Spy1828 | M5005_Spy1828 | phage infection protein                              | 0.386702347  | 1.36339E-05 |
| M5005_Spy1834 | M5005_Spy1834 | hypothetical protein                                 | -4.003417166 | 0.015006992 |
| M5005_Spy1837 | M5005_Spy1837 | phosphoesterase, DHH family protein                  | -4.225291276 | 6.28895E-17 |
| M5005_Spy1842 | sdhA          | L-serine dehydratase                                 | 0.371627958  | 4.40495E-09 |
| M5005_Spy1843 | M5005_Spy1843 | transglycosylase SLT domain family protein           | 0.177933795  | 0.060683246 |
| M5005_Spy1849 | M5005_Spy1849 | zinc protease                                        | 0.186953924  | 0.042739332 |
| M5005_Spy1850 | M5005_Spy1850 | zinc protease                                        | 0.206005312  | 0.028349113 |
| M5005_Spy1851 | hasA          | hyaluronan synthase                                  | 0.173996812  | 0.005514679 |
| M5005_Spy1854 | M5005_Spy1854 | putative cytosolic protein                           | 0.426090392  | 0.05897268  |
| M5005_Spy1856 | M5005_Spy1856 | glucose uptake protein-like protein                  | 0.137265613  | 0.079117191 |
| M5005_Spy1857 | guaB          | inosine-5'-monophosphate dehydrogenase               | 0.414805974  | 0.000169353 |
| M5005_Spy1862 | M5005_Spy1862 | ABC transporter, permease protein                    | -0.254089421 | 0.004770442 |
| M5005_Spy1863 | M5005_Spy1863 | transposase                                          | 0.394988955  | 0.027103422 |
| M5005_Spy1866 | parB          | chromosome partitioning protein                      | -0.179182668 | 0.03784202  |

\* fitness score is defined as log2 fold changes in sequence read counts between input and output pools. Only genes with statistically significant change (q value < 0.1) are listed.
