# Supplementary material for: Novel Genes Required for the Fitness of Streptococcus pyogenes in Human Saliva
Source: PubMed Central journal article supplement (PMC5663985; doi:10.1128/mspheredirect.00460-17), 2017-11-01
Supplement: sph006172393st7.pdf [file sph006172393st7.pdf]

TABLE S6 Fitness score of each gene in the M1 GAS genome after 48 hour saliva incubation.

| locus_tag     | gene_name     | function                                                                          | Fitness score* | q.value     |
|---------------|---------------|-----------------------------------------------------------------------------------|----------------|-------------|
| M5005_Spy0004 | M5005_Spy0004 | GTP-binding protein                                                               | -0.80121639    | 0.026443415 |
| M5005_Spy0009 | M5005_Spy0009 | hypothetical protein                                                              | -6.467121039   | 0.00052947  |
| M5005_Spy0013 | ftsH          | cell division protein                                                             | -0.989293892   | 0.002280046 |
| M5005_Spy0014 | M5005_Spy0014 | amino acid permease                                                               | -0.244946209   | 0.005182553 |
| M5005_Spy0017 | sibA          | secreted protein                                                                  | -6.628150267   | 3.95358E-05 |
| M5005_Spy0019 | recO          | DNA repair protein                                                                | -0.810889535   | 0.060294579 |
| M5005_Spy0022 | M5005_Spy0022 | phosphoribosylaminoimidazole-succinocarboxamide synthase                          | 0.463506302    | 1.74504E-08 |
| M5005_Spy0023 | M5005_Spy0023 | phosphoribosylformylglycinamide synthase                                          | 0.193846214    | 0.01281588  |
| M5005_Spy0024 | purF          | amidophosphoribosyltransferase                                                    | 0.696199804    | 3.81893E-22 |
| M5005_Spy0025 | purM          | phosphoribosylformylglycinamide cyclo-ligase                                      | 0.320996766    | 0.000314478 |
| M5005_Spy0033 | purB          | adenylosuccinate lyase                                                            | 0.362710759    | 2.66928E-05 |
| M5005_Spy0035 | ruvB          | holliday junction DNA helicase                                                    | -5.388536847   | 0.005013446 |
| M5005_Spy0038 | M5005_Spy0038 | acyltransferase family                                                            | -5.077912819   | 0.034134532 |
| M5005_Spy0040 | adhA          | alcohol dehydrogenase                                                             | 0.487378041    | 0.000153791 |
| M5005_Spy0041 | M5005_Spy0041 | Na <sup>+</sup> driven multidrug efflux pump                                      | 0.266866586    | 0.003751017 |
| M5005_Spy0065 | adk           | adenylate kinase                                                                  | -2.475594045   | 0.041836533 |
| M5005_Spy0075 | M5005_Spy0075 | 4-diphosphocytidyl-2-C-methyl-D-erythritol kinase                                 | 0.277208137    | 0.040827722 |
| M5005_Spy0076 | M5005_Spy0076 | 4-diphosphocytidyl-2-C-methyl-D-erythritol kinase                                 | 0.325246039    | 0.055392029 |
| M5005_Spy0077 | adcR          | transcriptional regulator, MarR family                                            | 0.900675715    | 0.000103813 |
| M5005_Spy0078 | adcC          | high-affinity zinc uptake system ATP-binding protein                              | 0.282251128    | 0.000187604 |
| M5005_Spy0079 | adcB          | high-affinity zinc uptake system membrane protein                                 | 0.263326621    | 0.00125906  |
| M5005_Spy0084 | rpoC          | DNA-directed RNA polymerase beta' chain                                           | 0.457230017    | 0.095575452 |
| M5005_Spy0085 | M5005_Spy0085 | putative DNA binding protein                                                      | -1.201021059   | 0.085926054 |
| M5005_Spy0089 | M5005_Spy0089 | comG operon protein 4                                                             | -0.373618704   | 0.016956917 |
| M5005_Spy0092 | M5005_Spy0092 | comG operon protein 6                                                             | 0.210116192    | 0.079110579 |
| M5005_Spy0097 | pepA          | glutamyl aminopeptidase                                                           | 0.235203908    | 0.015581204 |
| M5005_Spy0098 | M5005_Spy0098 | hypothetical protein                                                              | 0.42939843     | 0.068725633 |
| M5005_Spy0101 | M5005_Spy0101 | tRNA binding domain protein                                                       | 0.373718916    | 2.65764E-05 |
| M5005_Spy0102 | M5005_Spy0102 | single-strand DNA binding protein                                                 | 0.212853957    | 0.073437748 |
| M5005_Spy0103 | M5005_Spy0103 | deoxyadenosine kinase/deoxyguanosine kinase                                       | 0.408374505    | 0.000123443 |
| M5005_Spy0104 | M5005_Spy0104 | tRNA-dihydrouridine synthase                                                      | -1.724483441   | 1.81124E-32 |
| M5005_Spy0105 | M5005_Spy0105 | 33 kDa chaperonin                                                                 | -1.051651544   | 1.8081E-08  |
| M5005_Spy0107 | M5005_Spy0107 | fibronectin-binding protein                                                       | 0.280174385    | 0.000326299 |
| M5005_Spy0109 | M5005_Spy0109 | fibronectin-binding protein                                                       | 0.19814323     | 0.01281588  |
| M5005_Spy0112 | M5005_Spy0112 | transposase                                                                       | 0.336676534    | 0.05576E-07 |
| M5005_Spy0113 | M5005_Spy0113 | transposase                                                                       | 0.293925013    | 0.000829247 |
| M5005_Spy0116 | atoE          | short-chain fatty acids transporter                                               | 0.22101831     | 0.002562473 |
| M5005_Spy0119 | M5005_Spy0119 | acetyl-CoA acetyltransferase                                                      | 0.370482102    | 4.89397E-06 |
| M5005_Spy0121 | M5005_Spy0121 | acetyl-CoA:acetacetyl-CoA transferase beta subunit                                | 0.393715791    | 0.011829084 |
| M5005_Spy0122 | M5005_Spy0122 | putative DNA-binding protein                                                      | -1.227186208   | 7.96851E-14 |
| M5005_Spy0124 | sloR          | transcriptional regulator                                                         | 0.383862604    | 1.61404E-06 |
| M5005_Spy0131 | ntpA          | V-type sodium ATP synthase subunit A                                              | 0.162451945    | 0.091708441 |
| M5005_Spy0132 | ntpB          | V-type sodium ATP synthase subunit B                                              | 0.254761582    | 0.014345671 |
| M5005_Spy0136 | purA          | adenylosuccinate synthetase                                                       | 0.438147889    | 0.023036067 |
| M5005_Spy0139 | nga           | NAD glycohydrolase                                                                | 0.173657187    | 0.025149723 |
| M5005_Spy0142 | M5005_Spy0142 | hypothetical protein                                                              | 0.420822992    | 0.010120335 |
| M5005_Spy0143 | M5005_Spy0143 | hypothetical protein                                                              | 0.485076154    | 0.073437748 |
| M5005_Spy0144 | M5005_Spy0144 | hypothetical protein                                                              | -0.559263662   | 0.000266666 |
| M5005_Spy0147 | leuS          | leucyl-tRNA synthetase                                                            | -5.800450033   | 0.003807562 |
| M5005_Spy0148 | M5005_Spy0148 | PTS system, 3-keto-L-gulonate specific IIC component                              | 0.236265258    | 0.02858806  |
| M5005_Spy0150 | M5005_Spy0150 | PTS system, 3-keto-L-gulonate specific IIA component                              | 0.38901477     | 0.042981232 |
| M5005_Spy0153 | araD          | L-ribulose-5-phosphate 4-epimerase                                                | 0.641949316    | 1.27144E-05 |
| M5005_Spy0158 | opuABC        | glycine betaine-binding protein/glycine betaine transport system permease protein | 0.258706707    | 0.031763716 |
| M5005_Spy0160 | M5005_Spy0160 | CoA binding protein                                                               | 0.598663149    | 0.076120107 |
| M5005_Spy0161 | perR          | ferric uptake regulation protein                                                  | 0.408142232    | 0.034134532 |
| M5005_Spy0169 | M5005_Spy0169 | malonate permease                                                                 | 0.471727932    | 1.24953E-11 |
| M5005_Spy0175 | tgt           | queuine tRNA-ribosyltransferase                                                   | 0.262396654    | 0.023202172 |
| M5005_Spy0176 | M5005_Spy0176 | zinc finger protein                                                               | 0.294550917    | 0.011970461 |
| M5005_Spy0177 | M5005_Spy0177 | bioY protein                                                                      | 0.182170037    | 0.073437748 |
| M5005_Spy0178 | M5005_Spy0178 | metal-dependent hydrolase                                                         | 0.411832661    | 0.000131456 |
| M5005_Spy0180 | M5005_Spy0180 | S-layer homology domain                                                           | 0.226477301    | 0.002553307 |
| M5005_Spy0182 | speG          | exotoxin type G precursor                                                         | -0.306100467   | 0.003242166 |
| M5005_Spy0183 | M5005_Spy0183 | putative membrane associated protein                                              | 0.475894873    | 1.63466E-05 |
| M5005_Spy0196 | M5005_Spy0196 | multidrug resistance ABC transporter ATP-binding and permease protein             | 1.033497918    | 7.29201E-17 |
| M5005_Spy0197 | M5005_Spy0197 | multidrug resistance ABC transporter ATP-binding and permease protein             | 0.722724919    | 6.83084E-10 |
| M5005_Spy0198 | M5005_Spy0198 | putative cytosolic protein                                                        | 0.363978533    | 0.027759554 |
| M5005_Spy0199 | M5005_Spy0199 | deoxyuridine 5'-triphosphate nucleotidohydrolase                                  | 1.015124317    | 0.050478912 |
| M5005_Spy0200 | radA          | DNA repair protein                                                                | 0.293524189    | 0.020591145 |
| M5005_Spy0201 | M5005_Spy0201 | carbonic anhydrase                                                                | 0.884250218    | 2.11032E-06 |
| M5005_Spy0205 | fasC          | sensory transduction protein kinase                                               | -0.163852014   | 0.073437748 |
| M5005_Spy0208 | M5005_Spy0208 | 60 kDa inner membrane protein YIDC                                                | 0.492884799    | 0.001013129 |
| M5005_Spy0209 | M5005_Spy0209 | jag protein                                                                       | 0.508362754    | 0.033839732 |
| M5005_Spy0212 | M5005_Spy0212 | N-acetylmannosamine-6-phosphate 2-epimerase                                       | 0.455620545    | 0.009955499 |
| M5005_Spy0213 | M5005_Spy0213 | N-acetylneuraminate-binding protein                                               | 0.397488606    | 4.46295E-05 |
| M5005_Spy0214 | M5005_Spy0214 | N-acetylneuraminate transport system permease protein                             | 0.322255752    | 9.78105E-05 |
| M5005_Spy0217 | nanH          | N-acetylneuraminate lyase                                                         | 0.504756214    | 0.000115354 |
| M5005_Spy0218 | M5005_Spy0218 | N-acetylmannosamine kinase                                                        | 0.601263302    | 0.001769122 |
| M5005_Spy0224 | rpe           | ribulose-phosphate 3-epimerase                                                    | -2.083383598   | 6.64893E-05 |
| M5005_Spy0225 | M5005_Spy0225 | thiamin pyrophosphokinase                                                         | -2.337037891   | 4.48623E-08 |
| M5005_Spy0229 | prgA          | surface exclusion protein                                                         | 0.347619408    | 0.005855709 |
| M5005_Spy0240 | M5005_Spy0240 | undecaprenyl-phosphate alpha-N-acetylglucosaminophosphotransferase                | -1.515247992   | 1.76367E-08 |
| M5005_Spy0241 | rgpG          | putative cytosolic protein                                                        | -0.884096547   | 4.26258E-09 |

|               |               |                                                                                     |              |             |
|---------------|---------------|-------------------------------------------------------------------------------------|--------------|-------------|
| M5005_Spy0246 | M5005_Spy0246 | ABC transporter-associated protein                                                  | 0.406650426  | 0.02192047  |
| M5005_Spy0247 | M5005_Spy0247 | D-alanyl-D-alanine carboxypeptidase                                                 | 0.778085762  | 5.14257E-26 |
| M5005_Spy0249 | oppA          | oligopeptide-binding protein                                                        | -0.79729279  | 0.018141862 |
| M5005_Spy0251 | oppC          | oligopeptide transport system permease protein                                      | -1.003417326 | 0.001602549 |
| M5005_Spy0253 | oppF          | oligopeptide transport ATP-binding protein                                          | -0.701962833 | 0.0177399   |
| M5005_Spy0267 | M5005_Spy0267 | putative cytosolic protein                                                          | 0.27203195   | 0.000324183 |
| M5005_Spy0268 | M5005_Spy0268 | hypothetical protein                                                                | -0.431157455 | 0.0336946   |
| M5005_Spy0270 | M5005_Spy0270 | ABC transporter substrate-binding protein                                           | -1.283741621 | 0.037893538 |
| M5005_Spy0271 | M5005_Spy0271 | ABC transporter substrate-binding protein                                           | 0.708441769  | 1.69254E-27 |
| M5005_Spy0272 | M5005_Spy0272 | ABC transporter ATP-binding protein                                                 | 0.589353106  | 7.40574E-11 |
| M5005_Spy0273 | M5005_Spy0273 | ABC transporter permease protein                                                    | 0.610197338  | 3.01508E-16 |
| M5005_Spy0274 | braB          | branched-chain amino acid transport system carrier protein                          | 0.421796002  | 2.67003E-12 |
| M5005_Spy0280 | M5005_Spy0280 | heat shock protein                                                                  | 0.4537848    | 0.030400319 |
| M5005_Spy0284 | M5005_Spy0284 | putative regulatory protein                                                         | 0.716586026  | 0.094935422 |
| M5005_Spy0292 | M5005_Spy0292 | aminodeoxychorismate lyase family                                                   | -3.178649659 | 0.001602549 |
| M5005_Spy0293 | greA          | transcription elongation factor                                                     | -3.671640444 | 0.000647673 |
| M5005_Spy0300 | M5005_Spy0300 | hydrolase, HAD superfamily                                                          | 1.219908623  | 4.68589E-08 |
| M5005_Spy0301 | M5005_Spy0301 | integral membrane protein                                                           | -0.639476931 | 0.00292796  |
| M5005_Spy0306 | M5005_Spy0306 | CBS domain containing protein                                                       | -0.4484368   | 0.099476807 |
| M5005_Spy0308 | M5005_Spy0308 | putative cytosolic protein                                                          | -0.454277169 | 0.070987323 |
| M5005_Spy0312 | M5005_Spy0312 | 23S rRNA methyltransferase                                                          | 0.458124661  | 0.001962543 |
| M5005_Spy0314 | M5005_Spy0314 | phosphatidyglycerophosphatase B-like protein                                        | -0.470570153 | 9.93959E-06 |
| M5005_Spy0316 | M5005_Spy0316 | SAM-dependent methyltransferase                                                     | 0.333100392  | 0.039741746 |
| M5005_Spy0322 | fluB          | ferrichrome transport system permease protein                                       | 0.217962872  | 0.046276251 |
| M5005_Spy0326 | M5005_Spy0326 | export protein for polysaccharides and teichoic acids                               | -0.789552653 | 0.001909207 |
| M5005_Spy0327 | upp           | uracil phosphoribosyltransferase                                                    | -3.760793283 | 3.56E-47    |
| M5005_Spy0330 | tmk           | thymidylate kinase                                                                  | -5.474524159 | 0.005126851 |
| M5005_Spy0336 | M5005_Spy0336 | putative membrane associated protein                                                | 0.227719554  | 0.066639105 |
| M5005_Spy0339 | exoA          | exodeoxyribonuclease III                                                            | -0.521764974 | 0.001201726 |
| M5005_Spy0347 | nrdF1         | ribonucleoside-diphosphate reductase beta chain                                     | 0.414548993  | 0.01183171  |
| M5005_Spy0349 | nrdE1         | ribonucleoside-diphosphate reductase alpha chain                                    | 0.239585762  | 0.00231244  |
| M5005_Spy0355 | M5005_Spy0355 | hypothetical protein                                                                | -0.413641052 | 0.033509226 |
| M5005_Spy0356 | speJ          | exotoxin type J precursor                                                           | -0.531416664 | 8.08557E-06 |
| M5005_Spy0360 | M5005_Spy0360 | NAD-dependent oxidoreductase                                                        | 0.560109837  | 0.073777816 |
| M5005_Spy0362 | gcaD          | glucosamine-1-phosphate acetyltransferase/UDP-N-acetylglucosamine pyrophosphorylase | -2.819901279 | 0.027283575 |
| M5005_Spy0382 | mrsA2         | peptide methionine sulfoxide reductase                                              | -0.450389941 | 0.063082975 |
| M5005_Spy0386 | phoH          | phoH protein                                                                        | 0.251675584  | 0.008742256 |
| M5005_Spy0392 | M5005_Spy0392 | hypothetical protein                                                                | -0.275849052 | 0.097700924 |
| M5005_Spy0401 | M5005_Spy0401 | putative cytosolic protein                                                          | -0.745819735 | 0.023429239 |
| M5005_Spy0402 | M5005_Spy0402 | hypothetical protein                                                                | 0.212113026  | 0.045483892 |
| M5005_Spy0403 | M5005_Spy0403 | hypothetical protein                                                                | 0.345460377  | 0.011247255 |
| M5005_Spy0404 | M5005_Spy0404 | hypothetical protein                                                                | 0.333799383  | 0.015896016 |
| M5005_Spy0408 | fpg           | formamidopyrimidine-DNA glycosylase                                                 | 0.77133238   | 0.000104062 |
| M5005_Spy0410 | M5005_Spy0410 | ATPase                                                                              | 0.371146259  | 0.005101339 |
| M5005_Spy0413 | secG          | protein translocase subunit                                                         | -5.454139643 | 0.010122892 |
| M5005_Spy0414 | M5005_Spy0414 | exoribonuclease II                                                                  | 0.658883991  | 0.07552E-10 |
| M5005_Spy0416 | M5005_Spy0416 | glutaminyl-peptide cyclotransferase                                                 | 0.146665752  | 0.087758496 |
| M5005_Spy0418 | M5005_Spy0418 | permease                                                                            | 1.195384928  | 0.012376206 |
| M5005_Spy0421 | gloA          | lactoylglutathione lyase                                                            | -0.348835937 | 0.055819524 |
| M5005_Spy0422 | M5005_Spy0422 | NAD(P)H-dependent quinone reductase                                                 | 0.318253322  | 0.089536422 |
| M5005_Spy0424 | ccpA          | catabolite control protein A                                                        | 5.44809319   | 0.085908597 |
| M5005_Spy0427 | thrS          | threonyl-tRNA synthetase                                                            | 0.743032579  | 0.059036931 |
| M5005_Spy0430 | M5005_Spy0430 | ABC transporter permease protein                                                    | 0.324537781  | 0.038329821 |
| M5005_Spy0436 | vickK         | two-component sensor histidine kinase                                               | -0.409116947 | 0.097553316 |
| M5005_Spy0441 | aroE2         | shikimate 5-dehydrogenase                                                           | -0.240832379 | 0.00420541  |
| M5005_Spy0442 | M5005_Spy0442 | putative cytosolic protein                                                          | -0.503253364 | 0.000112234 |
| M5005_Spy0447 | M5005_Spy0447 | glycosyltransferase involved in cell wall biogenesis                                | -0.18654923  | 0.050478912 |
| M5005_Spy0448 | M5005_Spy0448 | hypothetical protein                                                                | -0.864731121 | 0.002763543 |
| M5005_Spy0449 | M5005_Spy0449 | UDP-glucose 6-dehydrogenase                                                         | -0.251396648 | 0.02086061  |
| M5005_Spy0450 | mefE          | macrolide-efflux protein                                                            | -0.246618577 | 0.00473631  |
| M5005_Spy0459 | M5005_Spy0459 | portal protein                                                                      | 0.199630433  | 0.042981232 |
| M5005_Spy0460 | M5005_Spy0460 | hypothetical protein                                                                | 0.359757774  | 0.008286162 |
| M5005_Spy0462 | M5005_Spy0462 | hypothetical protein                                                                | -0.3496676   | 0.011235629 |
| M5005_Spy0463 | M5005_Spy0463 | putative cytosolic protein                                                          | -0.319129954 | 0.016477617 |
| M5005_Spy0465 | M5005_Spy0465 | hypothetical protein                                                                | -0.350703968 | 0.055819524 |
| M5005_Spy0466 | M5005_Spy0466 | hypothetical protein                                                                | -0.559105426 | 1.95809E-08 |
| M5005_Spy0476 | bglA          | 6-phospho-beta-glucosidase                                                          | 0.139432888  | 0.074138854 |
| M5005_Spy0480 | M5005_Spy0480 | transcription accessory protein                                                     | 0.254495367  | 0.003921628 |
| M5005_Spy0485 | lgt           | prolipoprotein diacylglycerol transferase                                           | -1.514213018 | 2.90969E-13 |
| M5005_Spy0486 | M5005_Spy0486 | hypothetical protein                                                                | -1.335010684 | 1.60421E-48 |
| M5005_Spy0491 | M5005_Spy0491 | peptidase family U32                                                                | 0.195959898  | 0.035799135 |
| M5005_Spy0495 | lysS          | lysyl-tRNA synthetase                                                               | 5.566998795  | 0.075621278 |
| M5005_Spy0497 | M5005_Spy0497 | phosphoglycerate mutase                                                             | 0.24300318   | 0.042251224 |
| M5005_Spy0500 | M5005_Spy0500 | N-acetylmuramoyl-L-alanine amidase                                                  | 2.009170538  | 0.003074125 |
| M5005_Spy0504 | pepF          | oligoendopeptidase F                                                                | 0.231640968  | 0.012708056 |
| M5005_Spy0513 | M5005_Spy0513 | putative cytosolic protein                                                          | -0.399169698 | 3.83489E-05 |
| M5005_Spy0517 | regR          | transcriptional regulator, LacI family                                              | 0.150030807  | 0.09943065  |
| M5005_Spy0518 | M5005_Spy0518 | oligohyaluronate lyase                                                              | 0.173131629  | 0.013228998 |
| M5005_Spy0520 | M5005_Spy0520 | PTS system, N-acetylgalactosamine-specific IIC component                            | 0.204210298  | 0.036622746 |
| M5005_Spy0522 | M5005_Spy0522 | unsaturated glucuronyl hydrolase                                                    | 0.150878671  | 0.095827026 |
| M5005_Spy0524 | idnO          | gluconate 5-dehydrogenase                                                           | -0.248533492 | 0.037022899 |
| M5005_Spy0525 | M5005_Spy0525 | galactose-6-phosphate isomerase LacB subunit                                        | -0.486542277 | 0.004543723 |
| M5005_Spy0536 | dinG          | ATP-dependent helicase                                                              | 0.860612947  | 1.64063E-51 |
| M5005_Spy0539 | M5005_Spy0539 | ATP-binding protein                                                                 | 1.216549546  | 0.000218713 |
| M5005_Spy0542 | pepD          | dipeptidase                                                                         | 0.17046382   | 0.066246537 |

|               |               |                                                      |              |             |
|---------------|---------------|------------------------------------------------------|--------------|-------------|
| M5005_Spy0545 | agaS          | galactosamine-6-phosphate deaminase (isomerizing)    | 0.187969276  | 0.045050329 |
| M5005_Spy0547 | M5005_Spy0547 | phosphoesterase, DHH family protein                  | -3.021810625 | 0.083049626 |
| M5005_Spy0554 | M5005_Spy0554 | separation ring formation regulator                  | 1.590734331  | 0.009463789 |
| M5005_Spy0560 | M5005_Spy0560 | transcriptional regulator                            | -0.16372523  | 0.055481599 |
| M5005_Spy0561 | epf           | putative extracellular matrix binding protein        | -0.130974269 | 0.052587559 |
| M5005_Spy0566 | sagE          | streptolysin S putative self-immunity protein        | -0.886178576 | 5.0364E-08  |
| M5005_Spy0567 | sagF          | streptolysin S biosynthesis protein                  | -0.646069417 | 1.02794E-09 |
| M5005_Spy0568 | sagG          | streptolysin S export ATP-binding protein            | -3.591807255 | 1.01347E-10 |
| M5005_Spy0569 | sagH          | streptolysin S export transmembrane protein          | -9.550753286 | 3.97519E-45 |
| M5005_Spy0570 | sagI          | streptolysin S export transmembrane protein          | -3.535902059 | 0.000896931 |
| M5005_Spy0582 | atpC          | ATP synthase epsilon chain                           | -3.619434894 | 0.035600914 |
| M5005_Spy0583 | M5005_Spy0583 | putative membrane associated protein                 | -0.482292413 | 0.008864751 |
| M5005_Spy0585 | epuA          | epuA protein                                         | -3.431252691 | 0.010310805 |
| M5005_Spy0588 | pheT          | phenylalanyl-tRNA synthetase beta chain              | 3.374952552  | 0.048432699 |
| M5005_Spy0591 | M5005_Spy0591 | ABC transporter permease protein                     | -0.356290488 | 0.000625482 |
| M5005_Spy0601 | M5005_Spy0601 | putative cytosolic protein                           | 0.450310749  | 0.018874614 |
| M5005_Spy0606 | rgpDc         | polysaccharide export ATP-binding protein            | -2.056855802 | 0.020685526 |
| M5005_Spy0609 | M5005_Spy0609 | phosphoglycerol transferase                          | -0.208803679 | 0.006397367 |
| M5005_Spy0611 | M5005_Spy0611 | hypothetical protein                                 | -0.741203306 | 1.43172E-08 |
| M5005_Spy0623 | M5005_Spy0623 | methyltransferase                                    | -0.337974689 | 0.062642017 |
| M5005_Spy0627 | gor           | glutathione reductase                                | -0.140512191 | 0.042358766 |
| M5005_Spy0628 | folC2         | folylpolyglutamate synthase/dihydrofolate synthase   | 0.258789027  | 0.061712435 |
| M5005_Spy0630 | nifS1         | cysteine desulfhydrase                               | -4.486916794 | 4.85637E-16 |
| M5005_Spy0631 | thil          | thiamine biosynthesis protein                        | -4.590172489 | 1.08352E-65 |
| M5005_Spy0632 | capA          | capsule biosynthesis protein                         | 0.184018221  | 0.051535364 |
| M5005_Spy0641 | pyrB          | aspartate carbamoyltransferase                       | -0.288579385 | 0.015988407 |
| M5005_Spy0642 | carA          | carbamoyl-phosphate synthase small chain             | -0.631877871 | 9.22589E-08 |
| M5005_Spy0643 | carB          | carbamoyl-phosphate synthase large chain             | -0.706332579 | 1.17224E-30 |
| M5005_Spy0644 | M5005_Spy0644 | periplasmic component of efflux system               | -1.541440308 | 4.1128E-99  |
| M5005_Spy0645 | M5005_Spy0645 | ABC transporter ATP-binding protein                  | -1.44457496  | 8.63787E-42 |
| M5005_Spy0646 | M5005_Spy0646 | ABC transporter permease protein                     | -1.584508519 | 1.48656E-95 |
| M5005_Spy0647 | M5005_Spy0647 | glycerophosphoryl diester phosphodiesterase          | -0.185580246 | 0.017530482 |
| M5005_Spy0650 | M5005_Spy0650 | hypothetical protein                                 | -1.15478348  | 4.72271E-06 |
| M5005_Spy0651 | M5005_Spy0651 | cell surface protein                                 | -0.17118654  | 0.013345994 |
| M5005_Spy0656 | trmD          | tRNA (guanine-N(1)-)-methyltransferase               | -1.153304497 | 0.043052855 |
| M5005_Spy0659 | apbA          | 2-dehydropanoate 2-reductase                         | -0.240377318 | 0.062493676 |
| M5005_Spy0662 | fruA          | PTS system, fructose-specific IIBC component         | 0.491315856  | 0.001298911 |
| M5005_Spy0665 | M5005_Spy0665 | transposase                                          | -0.658091204 | 2.65764E-05 |
| M5005_Spy0667 | M5005_Spy0667 | exotoxin type C precursor                            | -0.513485414 | 0.008731135 |
| M5005_Spy0668 | mac           | IgG-degrading protease                               | -0.138720984 | 0.086878004 |
| M5005_Spy0678 | M5005_Spy0678 | 5'-nucleotidase                                      | -0.158651615 | 0.022373836 |
| M5005_Spy0681 | M5005_Spy0681 | two-component system histidine kinase                | 0.497114507  | 2.31717E-14 |
| M5005_Spy0693 | M5005_Spy0693 | hypothetical protein                                 | -0.682978656 | 7.96851E-14 |
| M5005_Spy0694 | cipl          | ATP-dependent protease ATP-binding subunit           | -0.203670826 | 0.012695731 |
| M5005_Spy0697 | arsC          | arsenate reductase family protein                    | -1.103526379 | 0.039499256 |
| M5005_Spy0701 | cpsY          | transcriptional regulator, LysR family               | 0.451992162  | 0.000726224 |
| M5005_Spy0702 | M5005_Spy0702 | hypothetical protein                                 | -0.537928537 | 0.00578271  |
| M5005_Spy0703 | pyrF          | orotidine 5'-phosphate decarboxylase                 | 0.227778564  | 0.032126133 |
| M5005_Spy0715 | M5005_Spy0715 | SSU ribosomal protein S1P                            | 2.815455688  | 0.029015736 |
| M5005_Spy0717 | M5005_Spy0717 | rhodanese-related sulfurtransferase                  | -0.193034028 | 0.03428942  |
| M5005_Spy0718 | M5005_Spy0718 | hypothetical protein                                 | -0.66768531  | 0.015455493 |
| M5005_Spy0719 | M5005_Spy0719 | glutathione S-transferase                            | 0.326122642  | 0.001070897 |
| M5005_Spy0720 | M5005_Spy0720 | putative exfoliative toxin                           | 0.374509326  | 0.000854963 |
| M5005_Spy0722 | miaA          | tRNA delta(2)-isopentenylpyrophosphate transferase   | -0.897445585 | 1.79528E-06 |
| M5005_Spy0723 | hfIX          | GTP-binding protein                                  | 0.282690168  | 0.083792854 |
| M5005_Spy0728 | apt           | adenine phosphoribosyltransferase                    | -1.269625217 | 0.011695203 |
| M5005_Spy0732 | M5005_Spy0732 | NIF3-related protein                                 | 0.47300846   | 0.007023517 |
| M5005_Spy0736 | cpsFQ         | dTDP-glucose 4,6-dehydratase                         | -1.388990268 | 0.050082517 |
| M5005_Spy0739 | M5005_Spy0739 | tetratricopeptide repeat family protein              | -0.220365503 | 0.01052467  |
| M5005_Spy0743 | M5005_Spy0743 | ABC transporter substrate-binding protein            | 0.19731534   | 0.079479868 |
| M5005_Spy0745 | M5005_Spy0745 | ABC transporter permease protein                     | 0.428030981  | 0.023036067 |
| M5005_Spy0757 | hylA          | hyaluronate lyase precursor                          | -0.184658465 | 0.018862339 |
| M5005_Spy0759 | M5005_Spy0759 | putative membrane associated protein                 | -2.577094924 | 0.007148767 |
| M5005_Spy0767 | M5005_Spy0767 | 4-nitrophenylphosphatase                             | 0.308412199  | 0.004047161 |
| M5005_Spy0769 | M5005_Spy0769 | putative cytosolic protein                           | -0.274591418 | 3.75238E-05 |
| M5005_Spy0770 | M5005_Spy0770 | putative cytosolic protein                           | -0.23246321  | 0.015180111 |
| M5005_Spy0772 | M5005_Spy0772 | hypothetical protein                                 | -0.436729708 | 3.75238E-05 |
| M5005_Spy0775 | M5005_Spy0775 | nucleoside diphosphate kinase                        | -0.552164962 | 0.00646147  |
| M5005_Spy0777 | M5005_Spy0777 | collagen-like surface protein                        | -0.458186186 | 0.001668183 |
| M5005_Spy0779 | M5005_Spy0779 | putative membrane spanning protein                   | -0.163138512 | 0.041869067 |
| M5005_Spy0780 | M5005_Spy0780 | PTS system, mannose/fructose family IIA component    | 0.454006654  | 0.037326927 |
| M5005_Spy0781 | ptsB          | PTS system, mannose/fructose family IIB component    | 0.611672318  | 7.63204E-06 |
| M5005_Spy0782 | ptsC          | PTS system, mannose/fructose family IIC component    | 0.376551959  | 0.000569725 |
| M5005_Spy0783 | ptsD          | PTS system, mannose/fructose family IID component    | 0.331255596  | 0.019975057 |
| M5005_Spy0790 | gabD          | succinate-semialdehyde dehydrogenase [NADP+]         | -0.284347021 | 0.02086061  |
| M5005_Spy0791 | uvrC          | excinuclease ABC subunit C                           | -0.445433229 | 2.20381E-05 |
| M5005_Spy0793 | M5005_Spy0793 | Xaa-His dipeptidase                                  | 0.560703965  | 0.000100943 |
| M5005_Spy0802 | M5005_Spy0802 | relaxase                                             | -0.381411232 | 0.06865672  |
| M5005_Spy0803 | srtI          | protein involved in lantibiotic production           | -0.319651566 | 4.02023E-06 |
| M5005_Spy0804 | srtR          | nisin biosynthesis two-component response regulator  | -0.509964755 | 9.90401E-11 |
| M5005_Spy0805 | srtK          | nisin biosynthesis sensor protein                    | -0.593047294 | 3.99619E-12 |
| M5005_Spy0806 | srtA          | lantibiotic precursor                                | -0.302245633 | 0.031801553 |
| M5005_Spy0807 | srtT          | ABC transporter (ATP binding)-lantibiotic associated | -0.287940337 | 0.001915724 |
| M5005_Spy0808 | srtF          | lantibiotic transport ATP-binding protein            | -0.217577442 | 0.009049016 |
| M5005_Spy0809 | srtE          | lantibiotic transport permease protein               | -0.310343937 | 0.00050868  |

|               |               |                                                                         |              |             |
|---------------|---------------|-------------------------------------------------------------------------|--------------|-------------|
| M5005_Spy0810 | srtG          | lantibiotic transport permease protein                                  | -0.732801902 | 1.81742E-10 |
| M5005_Spy0817 | dacA1         | D-alanyl-D-alanine carboxypeptidase                                     | -0.646428424 | 2.21266E-11 |
| M5005_Spy0826 | potA          | spermidine/putrescine transport system ATP-binding protein              | -1.626790119 | 0.001197982 |
| M5005_Spy0829 | M5005_Spy0829 | spermidine/putrescine-binding protein                                   | -0.961070303 | 0.002665322 |
| M5005_Spy0830 | dpiA          | transcriptional regulatory protein                                      | -0.20632639  | 0.024495548 |
| M5005_Spy0834 | M5005_Spy0834 | Zn-dependent alcohol dehydrogenase                                      | -0.212902628 | 0.006286012 |
| M5005_Spy0835 | M5005_Spy0835 | class B acid phosphatase                                                | -0.201184949 | 0.009524881 |
| M5005_Spy0837 | M5005_Spy0837 | chloride channel protein                                                | -0.185223605 | 0.039954176 |
| M5005_Spy0838 | M5005_Spy0838 | lipase/acylhydrolase family protein                                     | -0.55727827  | 4.33802E-06 |
| M5005_Spy0840 | radC          | DNA repair protein                                                      | -0.227820748 | 0.005101339 |
| M5005_Spy0841 | M5005_Spy0841 | glutamine amidotransferase, class I                                     | -0.707558395 | 0.000125584 |
| M5005_Spy0852 | M5005_Spy0852 | short chain dehydrogenase                                               | -0.256792483 | 0.090248662 |
| M5005_Spy0858 | xpt           | xanthine phosphoribosyltransferase                                      | -0.268954242 | 0.018862339 |
| M5005_Spy0872 | nox           | NADH oxidase H <sub>2</sub> O-forming                                   | -0.59864277  | 7.62002E-09 |
| M5005_Spy0873 | ldh           | L-lactate dehydrogenase                                                 | -0.477887123 | 0.019613879 |
| M5005_Spy0874 | gyrA          | DNA gyrase subunit A                                                    | -0.977681224 | 0.029248331 |
| M5005_Spy0876 | M5005_Spy0876 | lactoylglutathione lyase                                                | -0.25003312  | 0.038977515 |
| M5005_Spy0877 | M5005_Spy0877 | hypothetical protein                                                    | -0.473604404 | 0.031736637 |
| M5005_Spy0878 | M5005_Spy0878 | hypothetical protein                                                    | -0.234939345 | 0.080297955 |
| M5005_Spy0879 | M5005_Spy0879 | hypothetical protein                                                    | -0.261789326 | 0.019374036 |
| M5005_Spy0891 | satD          | SatD                                                                    | 0.617325194  | 0.045483892 |
| M5005_Spy0893 | gid           | glucose inhibited division protein A                                    | -0.259273813 | 0.048432699 |
| M5005_Spy0895 | M5005_Spy0895 | putative membrane associated protein                                    | -0.389309652 | 0.064991662 |
| M5005_Spy0898 | M5005_Spy0898 | 2-(5"-triphosphoribosyl)-3'-dephosphocoenzyme-A synthase                | -0.188588206 | 0.043052855 |
| M5005_Spy0899 | citG          | transcriptional regulator, GntR family                                  | -0.337749688 | 1.58332E-05 |
| M5005_Spy0902 | M5005_Spy0902 | biotin carboxyl carrier protein of oxaloacetate decarboxylase           | 0.366176653  | 0.012105096 |
| M5005_Spy0903 | oadB          | oxaloacetate decarboxylase beta chain                                   | 0.307217067  | 0.011247255 |
| M5005_Spy0907 | citF          | citrate lyase alpha chain/citrate CoA-transferase                       | 0.171550105  | 0.050478912 |
| M5005_Spy0909 | oadA1         | oxaloacetate decarboxylase alpha chain                                  | 0.216740059  | 0.00420541  |
| M5005_Spy0910 | citC          | (citrate [pro-3S]-lyase)-ligase                                         | -0.333546645 | 2.57351E-05 |
| M5005_Spy0911 | M5005_Spy0911 | hypothetical protein                                                    | -0.277163007 | 0.003043587 |
| M5005_Spy0912 | M5005_Spy0912 | hypothetical protein                                                    | -0.856426057 | 0.079110579 |
| M5005_Spy0914 | M5005_Spy0914 | phage transcriptional repressor                                         | -0.346738044 | 9.02856E-06 |
| M5005_Spy0917 | M5005_Spy0917 | transcriptional regulator, GntR family                                  | -3.369771849 | 0.00210549  |
| M5005_Spy0918 | M5005_Spy0918 | hypothetical protein                                                    | -0.397583243 | 0.000129472 |
| M5005_Spy0919 | guaA          | GMP synthase (glutamine-hydrolyzing)                                    | -2.644873012 | 0.079479868 |
| M5005_Spy0921 | M5005_Spy0921 | ABC transporter ATP-binding protein                                     | -0.177911404 | 0.025445763 |
| M5005_Spy0922 | pdxK          | putative membrane spanning protein                                      | -0.204543515 | 0.064346731 |
| M5005_Spy0923 | M5005_Spy0923 | pyridoxine kinase                                                       | -0.255226652 | 0.005013446 |
| M5005_Spy0924 | M5005_Spy0924 | transcriptional regulator, GntR family                                  | -0.206589577 | 0.003163037 |
| M5005_Spy0925 | rhbB          | anaerobic ribonucleoside-triphosphate reductase                         | -0.367195648 | 0.015540508 |
| M5005_Spy0926 | M5005_Spy0926 | cardiolipin synthetase                                                  | -4.518570737 | 1.87905E-05 |
| M5005_Spy0933 | M5005_Spy0933 | putative NADH-dependent flavin oxidoreductase                           | -0.269177519 | 0.018819632 |
| M5005_Spy0934 | M5005_Spy0934 | lipoate-protein ligase A                                                | 0.172382542  | 0.091852654 |
| M5005_Spy0937 | M5005_Spy0937 | transporter                                                             | -1.497022595 | 0.03428942  |
| M5005_Spy0938 | pgmA          | phosphoglucomutase/phosphomannomutase                                   | -0.704754428 | 0.020334567 |
| M5005_Spy0939 | M5005_Spy0939 | nucleoside transport system permease protein                            | 1.423525894  | 4.01779E-91 |
| M5005_Spy0940 | M5005_Spy0940 | nucleoside transport system permease protein                            | 1.522236924  | 7.0464E-117 |
| M5005_Spy0941 | M5005_Spy0941 | nucleoside transport ATP-binding protein                                | 1.466779159  | 9.4611E-102 |
| M5005_Spy0942 | M5005_Spy0942 | nucleoside-binding protein                                              | 1.113322223  | 7.93514E-49 |
| M5005_Spy0943 | cdd           | cytidine deaminase                                                      | 1.143622623  | 1.06445E-31 |
| M5005_Spy0944 | M5005_Spy0944 | 16S rRNA m(2)G 1207 methyltransferase                                   | -0.620482362 | 7.22081E-11 |
| M5005_Spy0945 | coaA          | pantothenate kinase                                                     | -5.221473982 | 0.022902762 |
| M5005_Spy0947 | ciaH          | sensor protein                                                          | -0.474748144 | 3.00238E-06 |
| M5005_Spy0951 | pstB          | phosphate transport ATP-binding protein                                 | -2.978192892 | 2.6596E-117 |
| M5005_Spy0952 | pstB2         | phosphate transport ATP-binding protein                                 | -3.039122372 | 8.19558E-91 |
| M5005_Spy0953 | pstA          | phosphate transport system permease protein                             | -3.66352396  | 3.76273E-82 |
| M5005_Spy0954 | pstC          | phosphate transport system permease protein                             | -3.731565246 | 2.41396E-27 |
| M5005_Spy0955 | pstS          | phosphate-binding protein                                               | -3.418296477 | 1.20833E-65 |
| M5005_Spy0961 | truB          | tRNA pseudouridine synthase B                                           | -2.988818399 | 0.008611858 |
| M5005_Spy0962 | M5005_Spy0962 | hypothetical protein                                                    | -0.334517118 | 0.009641165 |
| M5005_Spy0970 | M5005_Spy0970 | NAD-dependent K <sup>+</sup> or Na <sup>+</sup> uptake system component | -2.489910656 | 0.003229991 |
| M5005_Spy0971 | M5005_Spy0971 | general stress protein, Gls24 family                                    | -1.314912395 | 7.44134E-07 |
| M5005_Spy0972 | M5005_Spy0972 | hypothetical protein                                                    | -1.147445632 | 0.025445763 |
| M5005_Spy0973 | M5005_Spy0973 | general stress protein, Gls24 family                                    | -0.928622544 | 1.00356E-06 |
| M5005_Spy0975 | M5005_Spy0975 | hypothetical protein                                                    | -1.850186941 | 2.2057E-06  |
| M5005_Spy0977 | pcrA          | DNA helicase II                                                         | -6.171575411 | 0.000202935 |
| M5005_Spy0980 | M5005_Spy0980 | cobalt-zinc-cadmium resistance protein                                  | -0.484768716 | 5.37384E-06 |
| M5005_Spy0981 | cfa           | cAMP factor                                                             | -0.490437364 | 6.58601E-08 |
| M5005_Spy0982 | M5005_Spy0982 | histidine-binding protein                                               | -0.197637301 | 0.052582081 |
| M5005_Spy0987 | sipC          | signal peptidase I                                                      | -1.84149263  | 1.3023E-51  |
| M5005_Spy0992 | M5005_Spy0992 | ABC transporter ATP-binding protein                                     | -1.509443047 | 6.36708E-09 |
| M5005_Spy0993 | M5005_Spy0993 | ABC transporter permease protein                                        | -1.477594628 | 7.95215E-08 |
| M5005_Spy0995 | M5005_Spy0995 | phage protein                                                           | -0.377219036 | 0.050065503 |
| M5005_Spy0998 | M5005_Spy0998 | phage protein                                                           | -0.262429119 | 0.074605928 |
| M5005_Spy1000 | M5005_Spy1000 | phage protein                                                           | -0.274441447 | 0.001201726 |
| M5005_Spy1001 | M5005_Spy1001 | phage-associated cell wall hydrolase                                    | 0.424829892  | 0.000451039 |
| M5005_Spy1002 | M5005_Spy1002 | N-acetylmuramoyl-L-alanine amidase                                      | -0.305979042 | 0.062600297 |
| M5005_Spy1021 | M5005_Spy1021 | phage protein                                                           | -0.624056329 | 2.90969E-13 |
| M5005_Spy1022 | M5005_Spy1022 | portal protein                                                          | -0.473504708 | 9.63722E-09 |
| M5005_Spy1023 | M5005_Spy1023 | terminase large subunit                                                 | -0.635879032 | 2.22189E-16 |
| M5005_Spy1044 | M5005_Spy1044 | phage protein                                                           | -0.319188699 | 0.085908597 |
| M5005_Spy1050 | M5005_Spy1050 | phage transcriptional repressor                                         | -1.354754083 | 3.5842E-05  |
| M5005_Spy1051 | M5005_Spy1051 | phage protein                                                           | -0.280017355 | 0.001109135 |
| M5005_Spy1055 | glgP          | glycogen phosphorylase                                                  | -0.163806986 | 0.022373836 |

|               |               |                                                                           |              |             |
|---------------|---------------|---------------------------------------------------------------------------|--------------|-------------|
| M5005_Spy1056 | malM          | 4-alpha-glucanotransferase                                                | 0.936798644  | 4.06672E-54 |
| M5005_Spy1057 | malR          | transcriptional regulator, LacI family                                    | 0.278212091  | 0.000168493 |
| M5005_Spy1058 | malE          | maltose/maltodextrin-binding protein                                      | 0.313247685  | 6.64893E-05 |
| M5005_Spy1059 | malF          | maltose transport system permease protein                                 | 0.367270557  | 1.46348E-07 |
| M5005_Spy1060 | malG          | maltose transport system permease protein                                 | 0.258151957  | 0.004640916 |
| M5005_Spy1061 | M5005_Spy1061 | transcriptional regulator, LacI family                                    | 0.618085185  | 1.3616E-21  |
| M5005_Spy1065 | amyA          | alpha-amylase                                                             | -0.274386065 | 2.62039E-05 |
| M5005_Spy1066 | amyB          | neopullulanase/cyclomaltodextrinase/maltogenic alpha-amylase              | -0.579233429 | 4.25792E-15 |
| M5005_Spy1067 | malX          | maltose/maltodextrin-binding protein                                      | -0.923463181 | 2.79824E-34 |
| M5005_Spy1068 | M5005_Spy1068 | transposase                                                               | -0.915354586 | 1.02556E-10 |
| M5005_Spy1069 | M5005_Spy1069 | esterase                                                                  | -0.236876084 | 0.018862339 |
| M5005_Spy1075 | uvrB          | excinuclease ABC subunit B                                                | -0.578960835 | 6.39446E-09 |
| M5005_Spy1076 | glnH          | transporter                                                               | 4.977975137  | 0.034134532 |
| M5005_Spy1078 | M5005_Spy1078 | hypothetical protein                                                      | -2.257774081 | 0.039513967 |
| M5005_Spy1081 | M5005_Spy1081 | PTS system, cellobiose-specific IIA component                             | 0.359129573  | 0.022636552 |
| M5005_Spy1083 | M5005_Spy1083 | transcription antiterminator, BglG family                                 | 0.161968481  | 0.015915663 |
| M5005_Spy1084 | M5005_Spy1084 | outer surface protein                                                     | 0.21339749   | 0.013905271 |
| M5005_Spy1085 | bgIA2         | beta-glucosidase                                                          | 0.480840127  | 2.64073E-08 |
| M5005_Spy1086 | M5005_Spy1086 | nicotinamide mononucleotide transporter                                   | 0.56485107   | 8.0465E-15  |
| M5005_Spy1087 | M5005_Spy1087 | putative cytosolic protein                                                | 0.884612135  | 0.068385305 |
| M5005_Spy1094 | M5005_Spy1094 | transporter, MFS superfamily                                              | 0.259696899  | 0.008742256 |
| M5005_Spy1095 | M5005_Spy1095 | putative cytosolic protein                                                | -0.20114759  | 0.088303192 |
| M5005_Spy1097 | M5005_Spy1097 | phosphorylase, Pnp/Udp family                                             | 0.235713751  | 0.050203386 |
| M5005_Spy1099 | M5005_Spy1099 | transcriptional regulator, LytR family                                    | -0.584428981 | 1.33375E-18 |
| M5005_Spy1102 | M5005_Spy1102 | ribonuclease BN                                                           | -0.447898576 | 0.03208786  |
| M5005_Spy1108 | metK2         | S-adenosylmethionine synthetase                                           | -2.665666795 | 0.000187604 |
| M5005_Spy1110 | birA          | biotin operon repressor/biotin-[acetyl-CoA-carboxylase] synthetase        | -1.40299824  | 0.003061224 |
| M5005_Spy1115 | M5005_Spy1115 | putative membrane spanning protein                                        | -0.386317245 | 0.001229649 |
| M5005_Spy1119 | gapN          | NADP-dependent glyceraldehyde-3-phosphate dehydrogenase                   | 6.441865579  | 0.025186074 |
| M5005_Spy1129 | M5005_Spy1129 | CAAX amino terminal protease family                                       | -0.220385518 | 0.01058867  |
| M5005_Spy1130 | M5005_Spy1130 | putative membrane spanning protein                                        | -0.183858675 | 0.05984632  |
| M5005_Spy1133 | surA          | peptidyl-prolyl cis-trans isomerase                                       | -0.551867045 | 0.000192463 |
| M5005_Spy1137 | M5005_Spy1137 | putative competence protein/transcription factor                          | -0.267886336 | 0.071907398 |
| M5005_Spy1139 | nagB          | glucosamine-6-phosphate isomerase                                         | -4.193665393 | 1.07975E-14 |
| M5005_Spy1147 | comEC         | COME operon protein 3                                                     | 0.217555709  | 0.001629878 |
| M5005_Spy1151 | M5005_Spy1151 | hypothetical protein with endo/excinuclease domain                        | -0.354245713 | 0.000873811 |
| M5005_Spy1157 | murF          | UDP-N-acetylmuramoylalanine-D-glutamyl-lysine-- D-alanyl-D-alanine ligase | 5.556998795  | 0.075621278 |
| M5005_Spy1165 | pyrD          | dihydroorotate dehydrogenase                                              | -0.281950298 | 0.006286012 |
| M5005_Spy1167 | M5005_Spy1167 | lead, cadmium, zinc and mercury transporting ATPase                       | 0.276071356  | 0.011358486 |
| M5005_Spy1170 | M5005_Spy1170 | putative membrane associated protein                                      | -0.494774633 | 2.98226E-06 |
| M5005_Spy1171 | M5005_Spy1171 | phage-associated cell wall hydrolase                                      | 0.210612451  | 0.024969828 |
| M5005_Spy1174 | M5005_Spy1174 | phage protein                                                             | 0.385565848  | 0.020320816 |
| M5005_Spy1182 | M5005_Spy1182 | phage protein                                                             | -0.731757122 | 0.008286162 |
| M5005_Spy1188 | M5005_Spy1188 | phage protein                                                             | 0.290216255  | 0.045335182 |
| M5005_Spy1197 | M5005_Spy1197 | phage protein                                                             | -0.456008396 | 0.003538408 |
| M5005_Spy1203 | M5005_Spy1203 | phage protein                                                             | 0.389134188  | 0.001668183 |
| M5005_Spy1215 | M5005_Spy1215 | phage protein                                                             | 0.495964939  | 0.002686892 |
| M5005_Spy1220 | M5005_Spy1220 | phage protein                                                             | -0.226785558 | 0.005190239 |
| M5005_Spy1222 | int2          | integrase                                                                 | -0.148565939 | 0.041659261 |
| M5005_Spy1223 | M5005_Spy1223 | DNA-binding protein HU                                                    | -2.174913445 | 0.048130396 |
| M5005_Spy1226 | M5005_Spy1226 | degV family protein                                                       | -0.630511253 | 1.32692E-07 |
| M5005_Spy1235 | M5005_Spy1235 | phosphoglucomutase                                                        | 0.225470105  | 0.023982661 |
| M5005_Spy1236 | phr           | deoxyribodipyrimidine photolyase                                          | -0.16361355  | 0.07534827  |
| M5005_Spy1237 | artP          | arginine transport ATP-binding protein                                    | -0.190283184 | 0.065660389 |
| M5005_Spy1238 | artQ          | arginine transport system permease protein                                | 0.259577814  | 0.027982524 |
| M5005_Spy1240 | clpE          | ATP-dependent clp protease ATP-binding subunit                            | -0.323440964 | 0.000274659 |
| M5005_Spy1242 | M5005_Spy1242 | putative cytosolic protein                                                | -7.608444821 | 1.51381E-33 |
| M5005_Spy1255 | typA          | GTP-binding protein                                                       | -4.575433519 | 0.000830429 |
| M5005_Spy1269 | asnA          | aspartate--ammonia ligase                                                 | -0.251033505 | 0.020141515 |
| M5005_Spy1270 | arcC          | carbamate kinase                                                          | -0.482305522 | 0.039741746 |
| M5005_Spy1271 | M5005_Spy1271 | Xaa-His dipeptidase                                                       | 0.502225237  | 4.92346E-07 |
| M5005_Spy1272 | M5005_Spy1272 | arginine/ornithine antiporter                                             | 0.161242981  | 0.054643931 |
| M5005_Spy1273 | arcB          | ornithine carbamoyltransferase                                            | -1.319030567 | 1.8134E-11  |
| M5005_Spy1279 | M5005_Spy1279 | putative cytosolic protein                                                | 0.429928638  | 7.50195E-07 |
| M5005_Spy1280 | M5005_Spy1280 | two-component sensor kinase                                               | 0.224361638  | 0.008122161 |
| M5005_Spy1287 | M5005_Spy1287 | hypothetical protein                                                      | 0.472912603  | 0.000537535 |
| M5005_Spy1293 | M5005_Spy1293 | hypothetical protein                                                      | -0.334049905 | 0.049929831 |
| M5005_Spy1297 | M5005_Spy1297 | phospho-2-dehydro-3-deoxyheptonate aldolase                               | -0.540603823 | 0.084059288 |
| M5005_Spy1301 | M5005_Spy1301 | putative cytosolic protein                                                | 0.378482422  | 0.000125584 |
| M5005_Spy1304 | lacZ          | beta-galactosidase                                                        | 0.408229233  | 5.58481E-08 |
| M5005_Spy1305 | M5005_Spy1305 | two-component response regulator                                          | 0.4667239    | 0.000112969 |
| M5005_Spy1306 | M5005_Spy1306 | two-component sensor kinase                                               | 0.488308793  | 2.92151E-09 |
| M5005_Spy1307 | M5005_Spy1307 | putative membrane spanning protein                                        | 0.840468479  | 3.92899E-08 |
| M5005_Spy1308 | M5005_Spy1308 | sugar-binding protein                                                     | 0.361881858  | 1.17645E-05 |
| M5005_Spy1309 | M5005_Spy1309 | sugar transport system permease protein                                   | 0.546001949  | 0.000169225 |
| M5005_Spy1310 | M5005_Spy1310 | sugar transport system permease protein                                   | 0.553540433  | 5.52214E-07 |
| M5005_Spy1317 | M5005_Spy1317 | alpha-mannosidase                                                         | -0.301693882 | 9.69997E-05 |
| M5005_Spy1318 | rocA          | sensory transduction protein kinase                                       | 1.398347665  | 0.084124674 |
| M5005_Spy1319 | M5005_Spy1319 | tRNA (uracil-5-)-methyltransferase                                        | -0.132432433 | 0.099630691 |
| M5005_Spy1320 | recX          | regulatory protein                                                        | -0.194478815 | 0.022641037 |
| M5005_Spy1325 | M5005_Spy1325 | ribosome-associated factor Y                                              | -1.099584576 | 4.04882E-23 |
| M5005_Spy1326 | comFC         | COMF operon protein 3                                                     | -0.405790057 | 4.83685E-06 |
| M5005_Spy1328 | M5005_Spy1328 | Xaa-Pro dipeptidase                                                       | -0.231903753 | 0.070341295 |
| M5005_Spy1329 | cysM          | cysteine synthase                                                         | 0.288006618  | 0.000647673 |
| M5005_Spy1333 | yvqE          | two-component sensor protein                                              | 0.366821548  | 0.013230485 |

|               |               |                                                                 |              |             |
|---------------|---------------|-----------------------------------------------------------------|--------------|-------------|
| M5005_Spy1344 | atoB          | acetyl-CoA acetyltransferase                                    | -0.444354546 | 0.015527665 |
| M5005_Spy1348 | M5005_Spy1348 | D-beta-hydroxybutyrate permease                                 | 0.218834135  | 0.015540508 |
| M5005_Spy1349 | luxS          | autoinducer-2 production protein                                | 0.29427768   | 0.018862339 |
| M5005_Spy1355 | pbp1A         | multimodular transpeptidase-transglycosylase                    | -0.561682942 | 0.013925526 |
| M5005_Spy1356 | pepC          | aminopeptidase C                                                | 0.169469573  | 0.064346731 |
| M5005_Spy1359 | M5005_Spy1359 | amino acid permease                                             | -0.561029009 | 0.002763543 |
| M5005_Spy1366 | M5005_Spy1366 | division specific D,D-transpeptidase/cell division protein ftsI | 3.371976055  | 0.097918619 |
| M5005_Spy1372 | proB          | ABC transporter permease protein                                | 0.233415478  | 0.002429291 |
| M5005_Spy1373 | M5005_Spy1373 | ABC transporter ATP-binding protein                             | -0.202126916 | 0.093583862 |
| M5005_Spy1375 | tkt           | transketolase                                                   | -3.962639533 | 6.29298E-36 |
| M5005_Spy1377 | M5005_Spy1377 | trans-acting positive regulator                                 | -0.477973153 | 0.000888004 |
| M5005_Spy1380 | glpO          | alpha-glycerophosphate oxidase                                  | 0.240273589  | 0.035634592 |
| M5005_Spy1381 | glpK          | glycerol kinase                                                 | -0.433757478 | 0.002733999 |
| M5005_Spy1382 | M5005_Spy1382 | putative membrane associated protein                            | -0.344693195 | 0.080866813 |
| M5005_Spy1388 | nagA          | N-acetylglucosamine-6-phosphate deacetylase                     | -7.212465674 | 5.2677E-157 |
| M5005_Spy1389 | M5005_Spy1389 | sodium-dependent phosphate transporter                          | -0.148806118 | 0.066687474 |
| M5005_Spy1391 | M5005_Spy1391 | degV family protein                                             | 1.736095736  | 0.052582081 |
| M5005_Spy1399 | M5005_Spy1399 | PTS system, galactose-specific IIC component                    | 0.784935252  | 7.88432E-18 |
| M5005_Spy1400 | M5005_Spy1400 | PTS system, galactose-specific IIB component                    | 0.490815896  | 1.04592E-13 |
| M5005_Spy1401 | M5005_Spy1401 | PTS system, galactose-specific IIA component                    | 0.383376922  | 0.003497479 |
| M5005_Spy1402 | lacR1         | lactose phosphotransferase system repressor                     | -1.366480206 | 7.25676E-31 |
| M5005_Spy1407 | M5005_Spy1407 | esterase                                                        | 0.226700319  | 0.001668183 |
| M5005_Spy1415 | sdaD2         | phage-encoded streptodornase                                    | -0.253198709 | 0.009657764 |
| M5005_Spy1418 | M5005_Spy1418 | phage protein                                                   | -0.497771868 | 0.000246481 |
| M5005_Spy1419 | M5005_Spy1419 | phage protein                                                   | 0.424467921  | 0.018862339 |
| M5005_Spy1420 | M5005_Spy1420 | phage protein                                                   | -0.846504521 | 0.005417691 |
| M5005_Spy1423 | M5005_Spy1423 | hyaluronoglucosaminidase                                        | 0.275804483  | 0.001902523 |
| M5005_Spy1431 | M5005_Spy1431 | phage protein                                                   | 0.67520532   | 0.018862339 |
| M5005_Spy1438 | M5005_Spy1438 | phage protein                                                   | -0.281395691 | 0.00229437  |
| M5005_Spy1439 | M5005_Spy1439 | portal protein                                                  | -1.439983846 | 8.4564E-127 |
| M5005_Spy1440 | M5005_Spy1440 | terminase large subunit                                         | -0.412153157 | 0.006194723 |
| M5005_Spy1444 | M5005_Spy1444 | adenine-specific methyltransferase                              | -0.311112327 | 0.039954176 |
| M5005_Spy1445 | M5005_Spy1445 | phage protein                                                   | -4.664231618 | 0.001085592 |
| M5005_Spy1449 | M5005_Spy1449 | DNA primase                                                     | 0.217251909  | 0.085116271 |
| M5005_Spy1456 | M5005_Spy1456 | phage protein                                                   | -4.990186237 | 0.042209046 |
| M5005_Spy1462 | M5005_Spy1462 | phage protein                                                   | -5.267644344 | 1.66913E-05 |
| M5005_Spy1465 | M5005_Spy1465 | phage protein                                                   | -0.424735962 | 0.001915724 |
| M5005_Spy1467 | int3          | integrase                                                       | 0.180163013  | 0.06865672  |
| M5005_Spy1468 | M5005_Spy1468 | tRNA (m(7)G46) methyltransferase                                | -13.00104577 | 3.2463E-165 |
| M5005_Spy1472 | hit           | bis(5'-nucleosyl)-tetraphosphatase (asymmetrical)               | -1.211067462 | 1.12156E-35 |
| M5005_Spy1473 | M5005_Spy1473 | hypothetical protein                                            | -0.974893093 | 1.96627E-05 |
| M5005_Spy1479 | manL          | PTS system, mannose-specific IIAB component                     | -0.702215056 | 1.36384E-08 |
| M5005_Spy1480 | manM          | PTS system, mannose-specific IIC component                      | -0.937929851 | 2.97938E-06 |
| M5005_Spy1481 | manN          | PTS system, mannose-specific IID component                      | -0.83889263  | 1.93122E-17 |
| M5005_Spy1498 | dnaK          | chaperone protein                                               | -5.236670412 | 0.022641037 |
| M5005_Spy1500 | hrcA          | heat-inducible transcription repressor                          | -3.599239831 | 0.005039853 |
| M5005_Spy1504 | M5005_Spy1504 | putative membrane spanning protein                              | 0.366307101  | 0.02192047  |
| M5005_Spy1509 | M5005_Spy1509 | pyruvate, phosphate dikinase                                    | 0.817043773  | 0.027317056 |
| M5005_Spy1512 | codY          | transcription pleiotropic repressor                             | -2.959789517 | 0.039513967 |
| M5005_Spy1513 | M5005_Spy1513 | aspartate aminotransferase                                      | -0.368993456 | 0.000189285 |
| M5005_Spy1515 | M5005_Spy1515 | hydrolase, HAD superfamily                                      | 0.172917017  | 0.060336408 |
| M5005_Spy1516 | asnB          | L-asparaginase                                                  | 0.455509504  | 0.000307381 |
| M5005_Spy1519 | recG          | ATP-dependent DNA helicase                                      | -1.11657301  | 6.08348E-11 |
| M5005_Spy1527 | M5005_Spy1527 | ferrichrome transport system permease protein                   | 0.618036991  | 5.33413E-05 |
| M5005_Spy1538 | pmi           | mannose-6-phosphate isomerase                                   | 0.628777823  | 0.00138895  |
| M5005_Spy1539 | scrK          | fructokinase                                                    | 0.414684224  | 0.010664926 |
| M5005_Spy1550 | uvrA          | excinuclease ABC subunit A                                      | -0.236775662 | 0.06826675  |
| M5005_Spy1558 | M5005_Spy1558 | transcriptional regulator                                       | -0.301444678 | 0.001966332 |
| M5005_Spy1560 | M5005_Spy1560 | phosphatidyglycerophosphate B                                   | -1.2080037   | 5.63962E-24 |
| M5005_Spy1561 | mutS2         | DNA mismatch repair protein                                     | -0.584722062 | 3.65797E-09 |
| M5005_Spy1567 | M5005_Spy1567 | hypothetical protein                                            | -0.286061264 | 0.090397294 |
| M5005_Spy1568 | dinP          | DNA polymerase IV                                               | 0.202610587  | 0.030632061 |
| M5005_Spy1573 | glpF2         | aquaporin                                                       | 1.611622487  | 0.050478912 |
| M5005_Spy1577 | pepXP         | Xaa-Pro dipeptidyl-peptidase                                    | 0.340952     | 0.004979884 |
| M5005_Spy1582 | dnaQ          | DNA polymerase III, epsilon chain                               | 0.307848822  | 0.009955499 |
| M5005_Spy1584 | M5005_Spy1584 | NAD(FAD)-utilizing dehydrogenase                                | 0.441960562  | 0.000317167 |
| M5005_Spy1585 | deoC          | deoxyribose-phosphate aldolase                                  | -0.233869603 | 0.02175804  |
| M5005_Spy1586 | nupC          | nucleoside permease                                             | 0.223529451  | 0.009561789 |
| M5005_Spy1587 | udp           | uridine phosphorylase                                           | 0.270827675  | 0.012740525 |
| M5005_Spy1595 | M5005_Spy1595 | Zn-dependent hydrolase                                          | 5.022470538  | 0.064532535 |
| M5005_Spy1602 | M5005_Spy1602 | putative kinase related to hydroxyacetone kinase                | -2.352861447 | 0.080939509 |
| M5005_Spy1608 | M5005_Spy1608 | alpha/beta hydrolase                                            | -0.580446044 | 0.003265802 |
| M5005_Spy1610 | pyrG          | CTP synthase                                                    | -0.142100121 | 0.052582081 |
| M5005_Spy1611 | ropE          | DNA-directed RNA polymerase delta chain                         | -1.41963475  | 2.98726E-16 |
| M5005_Spy1612 | ropA          | trigger factor, ppiase                                          | 0.70095093   | 0.002163563 |
| M5005_Spy1616 | thiD          | phosphomethylpyrimidine kinase/hydroxymethylpyrimidine kinase   | -2.492894758 | 0.095126277 |
| M5005_Spy1617 | M5005_Spy1617 | tRNA pseudouridine synthase A                                   | -2.283340962 | 0.0177399   |
| M5005_Spy1625 | salR          | transcriptional regulatory protein                              | -0.20136515  | 0.02883937  |
| M5005_Spy1626 | M5005_Spy1626 | sensory transduction protein kinase                             | -0.194677778 | 0.054116435 |
| M5005_Spy1632 | lacG          | 6-phospho-beta-galactosidase                                    | 0.258338563  | 0.000218513 |
| M5005_Spy1636 | lacC2         | tagatose-6-phosphate kinase                                     | -0.404226621 | 0.000283646 |
| M5005_Spy1638 | lacA2         | galactose-6-phosphate isomerase lacA subunit                    | -0.328668168 | 0.012289529 |
| M5005_Spy1639 | lacR2         | lactose phosphotransferase system repressor                     | 0.494478436  | 1.25242E-14 |
| M5005_Spy1640 | M5005_Spy1640 | DNA-damage-inducible protein J                                  | 0.283527932  | 0.015794251 |
| M5005_Spy1649 | M5005_Spy1649 | putative membrane spanning protein                              | 0.355707135  | 0.00206804  |

|               |               |                                                                           |              |              |
|---------------|---------------|---------------------------------------------------------------------------|--------------|--------------|
| M5005_Spy1651 | M5005_Spy1651 | putative cytosolic protein                                                | 0.259398798  | 0.081912993  |
| M5005_Spy1659 | M5005_Spy1659 | hypothetical protein                                                      | 0.453523068  | 0.073437748  |
| M5005_Spy1660 | M5005_Spy1660 | polyribonucleotide nucleotidyltransferase                                 | 1.245338181  | 0.020348967  |
| M5005_Spy1664 | M5005_Spy1664 | transcription antiterminator, BglG family                                 | 0.362199458  | 5.73456E-06  |
| M5005_Spy1669 | def           | peptide deformylase                                                       | 3.26014419   | 0.051298786  |
| M5005_Spy1680 | pulA          | pullulanase                                                               | 0.224386848  | 0.013551182  |
| M5005_Spy1682 | msmK          | multiple sugar transport ATP-binding protein                              | 0.797553942  | 2.07391E-22  |
| M5005_Spy1683 | lrp           | leucine rich protein                                                      | 0.737409202  | 1.98177E-09  |
| M5005_Spy1685 | M5005_Spy1685 | D-tyrosyl-tRNA(Tyr) deacylase                                             | 0.53485458   | 0.005929472  |
| M5005_Spy1692 | M5005_Spy1692 | PTS system, glucose-specific IIBC component                               | 0.597116861  | 2.77651E-07  |
| M5005_Spy1695 | M5005_Spy1695 | ribosomal protein L11 methyltransferase                                   | 0.559880437  | 0.022636552  |
| M5005_Spy1697 | M5005_Spy1697 | para-aminobenzoate synthetase component I/4-amino-4-deoxychorismate lyase | 0.239293096  | 0.012376206  |
| M5005_Spy1699 | M5005_Spy1699 | ATPase, AAA family                                                        | 0.683634362  | 4.99451E-13  |
| M5005_Spy1700 | M5005_Spy1700 | acetyltransferase                                                         | 0.278100883  | 0.070666156  |
| M5005_Spy1701 | flaR          | DNA topology modulation protein flar-related protein                      | 0.309190756  | 0.000449019  |
| M5005_Spy1702 | smeZ          | mitogenic exotoxin Z                                                      | -0.256644386 | 0.01183171   |
| M5005_Spy1704 | dppA          | dipeptide-binding protein                                                 | 0.177291251  | 0.084144004  |
| M5005_Spy1705 | dppB          | dipeptide transport system permease protein                               | 0.295792923  | 0.001602549  |
| M5005_Spy1706 | dppC          | dipeptide transport system permease protein                               | 0.416414853  | 0.000248447  |
| M5005_Spy1707 | dppD          | dipeptide transport ATP-binding protein                                   | 0.326891016  | 0.000693831  |
| M5005_Spy1708 | dppE          | dipeptide transport ATP-binding protein                                   | 0.264083142  | 0.020320816  |
| M5005_Spy1710 | M5005_Spy1710 | streptococcal histidine triad protein                                     | 0.185034073  | 0.029788019  |
| M5005_Spy1716 | M5005_Spy1716 | transposase                                                               | 0.393492466  | 3.31866E-05  |
| M5005_Spy1719 | emm10         | M protein                                                                 | -0.607432361 | 1.24953E-11  |
| M5005_Spy1720 | mga           | trans-acting positive regulator                                           | -0.416490412 | 1.91766E-11  |
| M5005_Spy1723 | isp           | immunogenic secreted protein                                              | 0.2862176    | 0.002852784  |
| M5005_Spy1726 | M5005_Spy1726 | ABC transporter permease protein                                          | 0.696430374  | 1.04083E-20  |
| M5005_Spy1727 | M5005_Spy1727 | ABC transporter ATP-binding protein                                       | 0.594670157  | 7.12678E-14  |
| M5005_Spy1728 | M5005_Spy1728 | periplasmic component of efflux system                                    | 0.830880895  | 4.61118E-26  |
| M5005_Spy1730 | M5005_Spy1730 | hypothetical protein                                                      | 0.331111849  | 0.001354501  |
| M5005_Spy1733 | M5005_Spy1733 | hypothetical protein                                                      | -0.571358682 | 0.001602549  |
| M5005_Spy1735 | speB          | streptococcal pyrogenic exotoxin B                                        | -0.448614901 | 1.46348E-07  |
| M5005_Spy1737 | rgg           | transcriptional regulator                                                 | -0.60803916  | 1.01158E-12  |
| M5005_Spy1741 | gidA          | glycerol dehydrogenase                                                    | 0.477242048  | 0.001350488  |
| M5005_Spy1744 | M5005_Spy1744 | PTS system, cellobiose-specific IIC component                             | 0.332225662  | 3.53777E-05  |
| M5005_Spy1749 | M5005_Spy1749 | pyruvate formate-lyase activating enzyme                                  | 0.273188698  | 0.036267549  |
| M5005_Spy1753 | pbp2A         | multimodular transpeptidase-transglycosylase                              | -1.701073932 | 1.21918E-38  |
| M5005_Spy1754 | M5005_Spy1754 | translation initiation inhibitor                                          | 0.578133079  | 8.59764E-09  |
| M5005_Spy1758 | M5005_Spy1758 | putative dipeptidase B                                                    | 0.224893912  | 0.012922985  |
| M5005_Spy1763 | clpC          | negative regulator of genetic competence                                  | 0.527358057  | 0.002822606  |
| M5005_Spy1764 | ctsR          | transcriptional regulator                                                 | -2.112263538 | 0.017323405  |
| M5005_Spy1769 | ahpF          | peroxiredoxin reductase (NAD(P)H)                                         | -1.608013058 | 4.78705E-08  |
| M5005_Spy1770 | hutI          | imidazolonepropionase                                                     | -0.658878789 | 7.49962E-08  |
| M5005_Spy1771 | hutU          | urocanate hydratase                                                       | 0.223761645  | 0.025186074  |
| M5005_Spy1772 | M5005_Spy1772 | glutamate formiminotransferase                                            | 0.535045256  | 1.59808E-11  |
| M5005_Spy1773 | M5005_Spy1773 | formiminotetrahydrofolate cyclodeaminase                                  | 0.452499942  | 0.000502414  |
| M5005_Spy1774 | fts2          | formate-tetrahydrofolate ligase                                           | 0.293682962  | 0.092294308  |
| M5005_Spy1776 | M5005_Spy1776 | amino acid permease                                                       | 0.287974874  | 0.054082194  |
| M5005_Spy1778 | hutG          | formiminoglutamase                                                        | 0.311724949  | 0.056344786  |
| M5005_Spy1779 | M5005_Spy1779 | transcriptional regulator, LuxR family                                    | 0.36470297   | 8.17407E-06  |
| M5005_Spy1781 | M5005_Spy1781 | protein translation elongation factor Ts                                  | -5.108954746 | 0.012376206  |
| M5005_Spy1782 | pepO          | neutral endopeptidase                                                     | -0.229625995 | 0.05278458   |
| M5005_Spy1783 | dexS          | trehalose-6-phosphate hydrolase                                           | -1.191324288 | 1.63034E-05  |
| M5005_Spy1787 | M5005_Spy1787 | glyoxalase family protein                                                 | 0.160235378  | 0.1079360043 |
| M5005_Spy1788 | yaaA          | protein yaaA                                                              | 0.255043352  | 0.01895794   |
| M5005_Spy1790 | M5005_Spy1790 | acetyltransferase                                                         | 0.449027849  | 0.047012372  |
| M5005_Spy1795 | M5005_Spy1795 | putative cytosolic protein                                                | -1.386113921 | 0.015769961  |
| M5005_Spy1797 | M5005_Spy1797 | putative cytosolic protein                                                | 0.729447051  | 0.079431343  |
| M5005_Spy1807 | argR2         | arginine repressor                                                        | 0.732316047  | 5.52603E-05  |
| M5005_Spy1808 | argS          | arginyl-tRNA synthetase                                                   | -0.673288887 | 0.001422107  |
| M5005_Spy1809 | uviB          | bacteriocin                                                               | -0.291216386 | 0.016747596  |
| M5005_Spy1810 | M5005_Spy1810 | putative membrane spanning protein                                        | -1.971145625 | 5.58352E-60  |
| M5005_Spy1811 | M5005_Spy1811 | putative membrane spanning protein                                        | -0.472299452 | 0.062886601  |
| M5005_Spy1817 | cadD          | cadmium resistance protein                                                | 0.249493028  | 0.041999538  |
| M5005_Spy1820 | M5005_Spy1820 | ftsK/SpoIIIE family                                                       | 0.386963026  | 0.001421108  |
| M5005_Spy1823 | M5005_Spy1823 | integral membrane protein                                                 | -0.916375635 | 0.019816437  |
| M5005_Spy1828 | M5005_Spy1828 | phage infection protein                                                   | 0.268573588  | 0.020320816  |
| M5005_Spy1834 | M5005_Spy1834 | hypothetical protein                                                      | -5.17957345  | 0.018862339  |
| M5005_Spy1837 | M5005_Spy1837 | phosphoesterase, DHH family protein                                       | -7.356812768 | 3.8605E-29   |
| M5005_Spy1840 | trmU          | tRNA (5-methylaminomethyl-2-thiouridylate)-methyltransferase              | -5.815019933 | 0.010094839  |
| M5005_Spy1842 | sdhA          | L-serine dehydratase                                                      | 0.557134673  | 3.0844E-06   |
| M5005_Spy1843 | M5005_Spy1843 | transglycosylase SLT domain family protein                                | 0.434316506  | 0.000318608  |
| M5005_Spy1848 | M5005_Spy1848 | putative membrane associated protein                                      | 4.837011797  | 0.065629818  |
| M5005_Spy1851 | hasA          | hyaluronan synthase                                                       | 0.214319893  | 0.001422107  |
| M5005_Spy1852 | hasB          | UDP-glucose 6-dehydrogenase                                               | -0.233693097 | 0.001201726  |
| M5005_Spy1853 | hasC          | UTP--glucose-1-phosphate uridylyltransferase                              | 0.324775405  | 5.05641E-05  |
| M5005_Spy1856 | M5005_Spy1856 | glucose uptake protein-like protein                                       | -0.22040789  | 0.015259435  |
| M5005_Spy1857 | guaB          | inosine-5'-monophosphate dehydrogenase                                    | 0.882414252  | 2.46744E-24  |
| M5005_Spy1862 | M5005_Spy1862 | ABC transporter, permease protein                                         | -0.5200987   | 2.46798E-09  |
| M5005_Spy1864 | M5005_Spy1864 | putative cytosolic protein                                                | -0.253255289 | 0.027283575  |
| M5005_Spy1866 | parB          | chromosome partitioning protein                                           | -0.305944422 | 0.006097699  |

\* fitness score is defined as log2 fold changes in sequence read counts between input and output pools. Only genes with statistically significant change (q value < 0.1) are listed.
