# Supplementary material for: Novel Genes Required for the Fitness of Streptococcus pyogenes in Human Saliva
Source: PubMed Central journal article supplement (PMC5663985; doi:10.1128/mspheredirect.00460-17), 2017-11-01
Supplement: sph006172393st8.pdf [file sph006172393st8.pdf]

**TABLE S7 Primers used in this study.**

| <b>Primer name</b>                  | <b>Sequence</b>                                                                 | <b>Remarks</b>               |
|-------------------------------------|---------------------------------------------------------------------------------|------------------------------|
| Spy0644-1                           | GCGT <u>GGATCCC</u> AGTCAGCTTATGATACTGCTGTTA                                    | BamHI site is underlined     |
| Spy0644-2                           | GCGT <u>GGATCCC</u> CTGGTTGAGAGGACTTATAATATCA                                   | BamHI site is underlined     |
| lacR.1-1                            | GTCC <u>GGATCCC</u> CTGATATGACAGTTTCGTAGAGACTT                                  | BamHI site is underlined     |
| lacR.1-2                            | GTCCGGATCCAGCTAGCTTTTGAATCTCTCCTTCA                                             | BamHI site is underlined     |
| Spy0646-1                           | GTCCGGATCCCACGAAGTGAAGCCAGAGTGGTTA                                              | BamHI site is underlined     |
| Spy0646-2                           | GTCCGGATCCTTCTCTAGTTTCGCTCTGTGACAGAT                                            | BamHI site is underlined     |
| carB-1                              | GTCCGGATCCTTGGTGGAACTGGTGGAGGAATATG                                             | BamHI site is underlined     |
| carB-2                              | GTCCGGATCCATCAATCTTGGTCAAGCTCTCAAGT                                             | BamHI site is underlined     |
| nifS1-1                             | GTCCGGATCCGCGTCTCGCATTTTAGAAGCTTCC                                              | BamHI site is underlined     |
| nifS1-2                             | GTCCGGATCCATCTGGGTAAGCGGACAAAGATTTG                                             | BamHI site is underlined     |
| pstS-1                              | GTCCGGATCCCTACAACCCTTAGTAGAAGCAGTAG                                             | BamHI site is underlined     |
| pstS-2                              | GTCCGGATCCATTTGCCTTAAACCCATTTAATTGC                                             | BamHI site is underlined     |
| Indexing PCR primer 1               | CAAGCAGAAGACGGCATAACGAGATCGGTT <u>CGCCTTA</u> ACACTCTTTCCCTACACGACGCTCTTCCGATCT | Index sequence is underlined |
| Indexing PCR primer 2               | CAAGCAGAAGACGGCATAACGAGATCGGTT <u>CTAGTACG</u> ACTCTTTCCCTACACGACGCTCTTCCGATCT  | Index sequence is underlined |
| Indexing PCR primer 4               | CAAGCAGAAGACGGCATAACGAGATCGGTT <u>GCTCAGGA</u> AACTCTTTCCCTACACGACGCTCTTCCGATCT | Index sequence is underlined |
| Indexing PCR primer 3               | CAAGCAGAAGACGGCATAACGAGATCGGTT <u>TCTGCC</u> TAACTCTTTCCCTACACGACGCTCTTCCGATCT  | Index sequence is underlined |
| Indexing PCR primer 5               | CAAGCAGAAGACGGCATAACGAGATCGGTT <u>AGGAGTCC</u> AACTCTTTCCCTACACGACGCTCTTCCGATCT | Index sequence is underlined |
| Indexing PCR primer 6               | CAAGCAGAAGACGGCATAACGAGATCGGTT <u>CATGCCTA</u> AACTCTTTCCCTACACGACGCTCTTCCGATCT | Index sequence is underlined |
| Indexing PCR primer 7               | CAAGCAGAAGACGGCATAACGAGATCGGTT <u>GTAGAGAG</u> AACTCTTTCCCTACACGACGCTCTTCCGATCT | Index sequence is underlined |
| Indexing PCR primer 8               | CAAGCAGAAGACGGCATAACGAGATCGGTT <u>CTCTCTG</u> AACTCTTTCCCTACACGACGCTCTTCCGATCT  | Index sequence is underlined |
| Adaptor primer 1                    | P-GATCGGAAGAGCACACGTCT                                                          | P = Phosphorylation          |
| Adaptor primer 2                    | ACACTCTTTCCCTACACGACGCTCTTCCGATC*                                               | * = Phosphorothioate bond    |
| Specific ISS1 primer                | AATGATACGGCGACCACCGAGATCTACACGTTTCATTGATATATCCTCGCTG                            |                              |
| Custom read 1 sequencing primer     | GTTTCATTGATATATCCTCGCTGTCATTTTTATTTCATTTTACACTAAAATAGACTTAT                     |                              |
| Custom index read sequencing primer | AGATCGGAAGAGCGTCGTGTAGGGAAAGAGTGT                                               |                              |

Note: Adaptor primer 1 and Adaptor primer 2 (Oligonucleotide sequences © 2007 - 2012 Illumina, Inc. all rights reserved)
